# Supplementary material for: Core-size and geometry versus toxicity in small amino terminated PAMAM dendrimers
Source: Royal Society of Chemistry journal article supplement (doi:10.1039/d4ra02020k), 2024-01-01
Supplement: d4ra02020k1.pdf [file d4ra02020k1.pdf]

## Supplementary material

### Core-size and geometry versus toxicity in small amino terminated PAMAM dendrimers.

Claus Bøge Hansen<sup>a</sup>, Anna Janaszewska<sup>b</sup>, Monika Dąbrzalska<sup>b</sup>, Monika Marcinkowska<sup>b</sup>, Barbara Klajnert-Maculewicz<sup>b</sup>, Jørn Bolstad Christensen<sup>a\*</sup>

<sup>a</sup> Department of Chemistry, Faculty of Science, University of Copenhagen, Thorvaldsensvej 40, DK-1871 Frederiksberg, Denmark; [jbc@chem.ku.dk](mailto:jbc@chem.ku.dk)

<sup>b</sup> Department of General Biophysics, Faculty of Biology and Environmental Protection, University of Lodz, 141/143 Pomorska Street, 90-236 Lodz, Poland

### NMR- and ESMS-spectra of the compounds synthesized

Compound 1: Page 2-5

Compound 2: Page 6 – 9

Compound 3: Page 10 – 13

Compound 4: Page 14 – 17

Compound 5: Page 18 – 21

Compound 6: Page 22 – 25

Compound 7: Page 26 – 29

Compound 8: Page 30 – 33

Compound 9: Page 34 – 37

Compound 10: Page 38 – 41

Compound 11: Page 42 – 45

Compound 12: Page 46 – 49

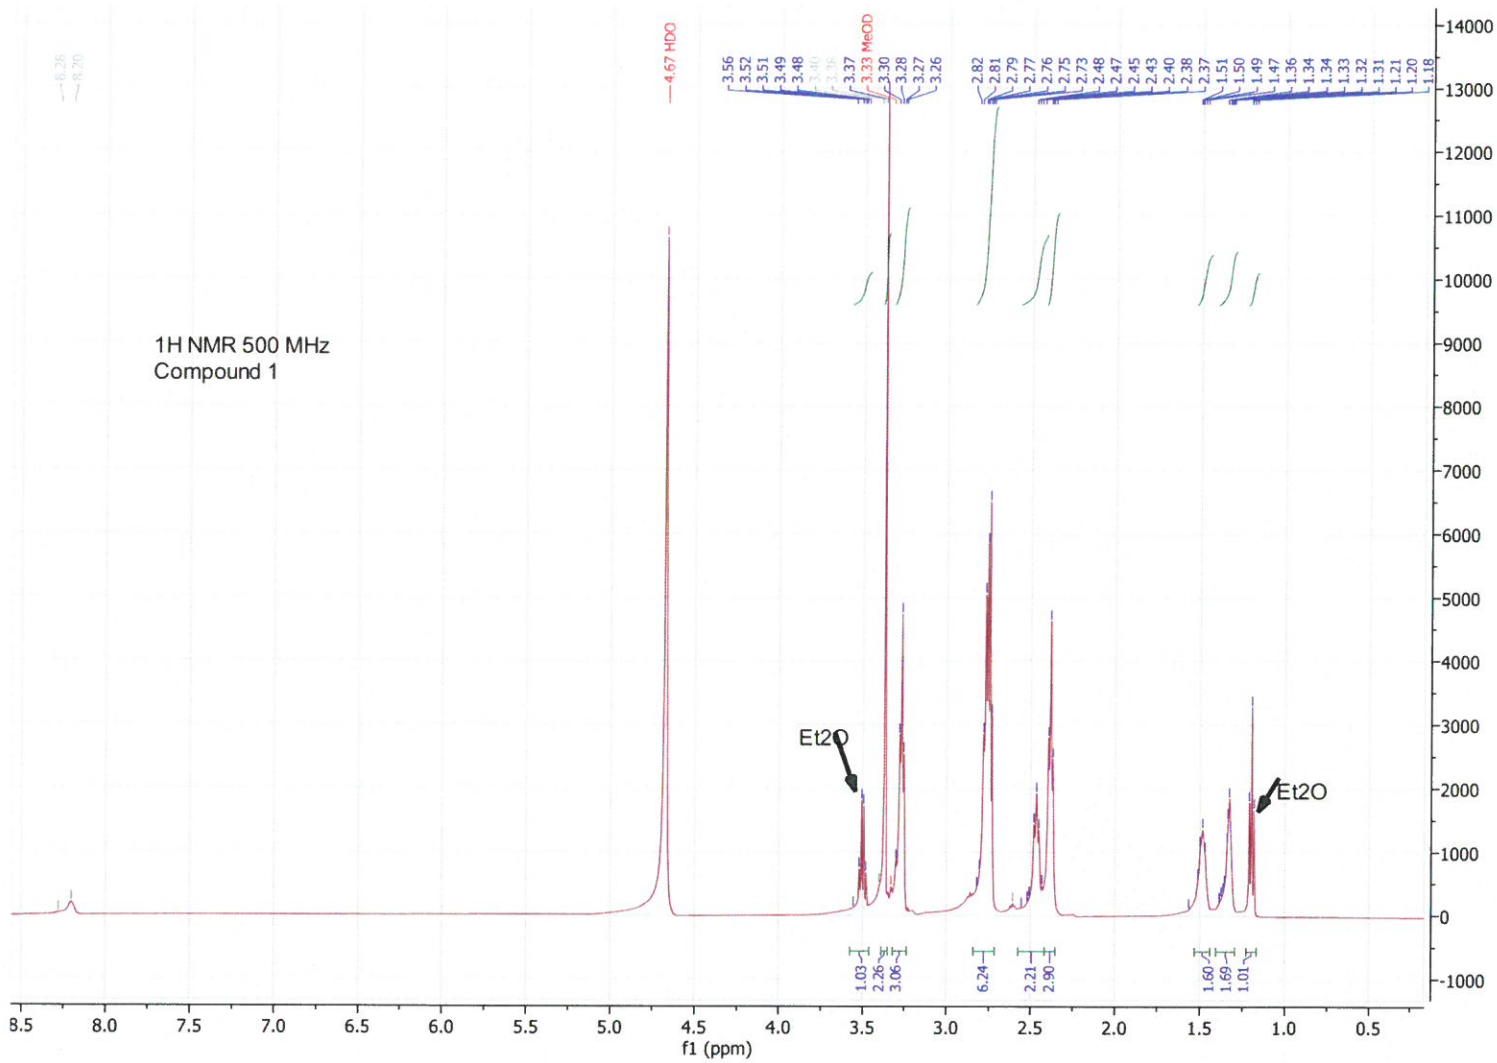

COSY NMR 500 MHz  
Compound 1

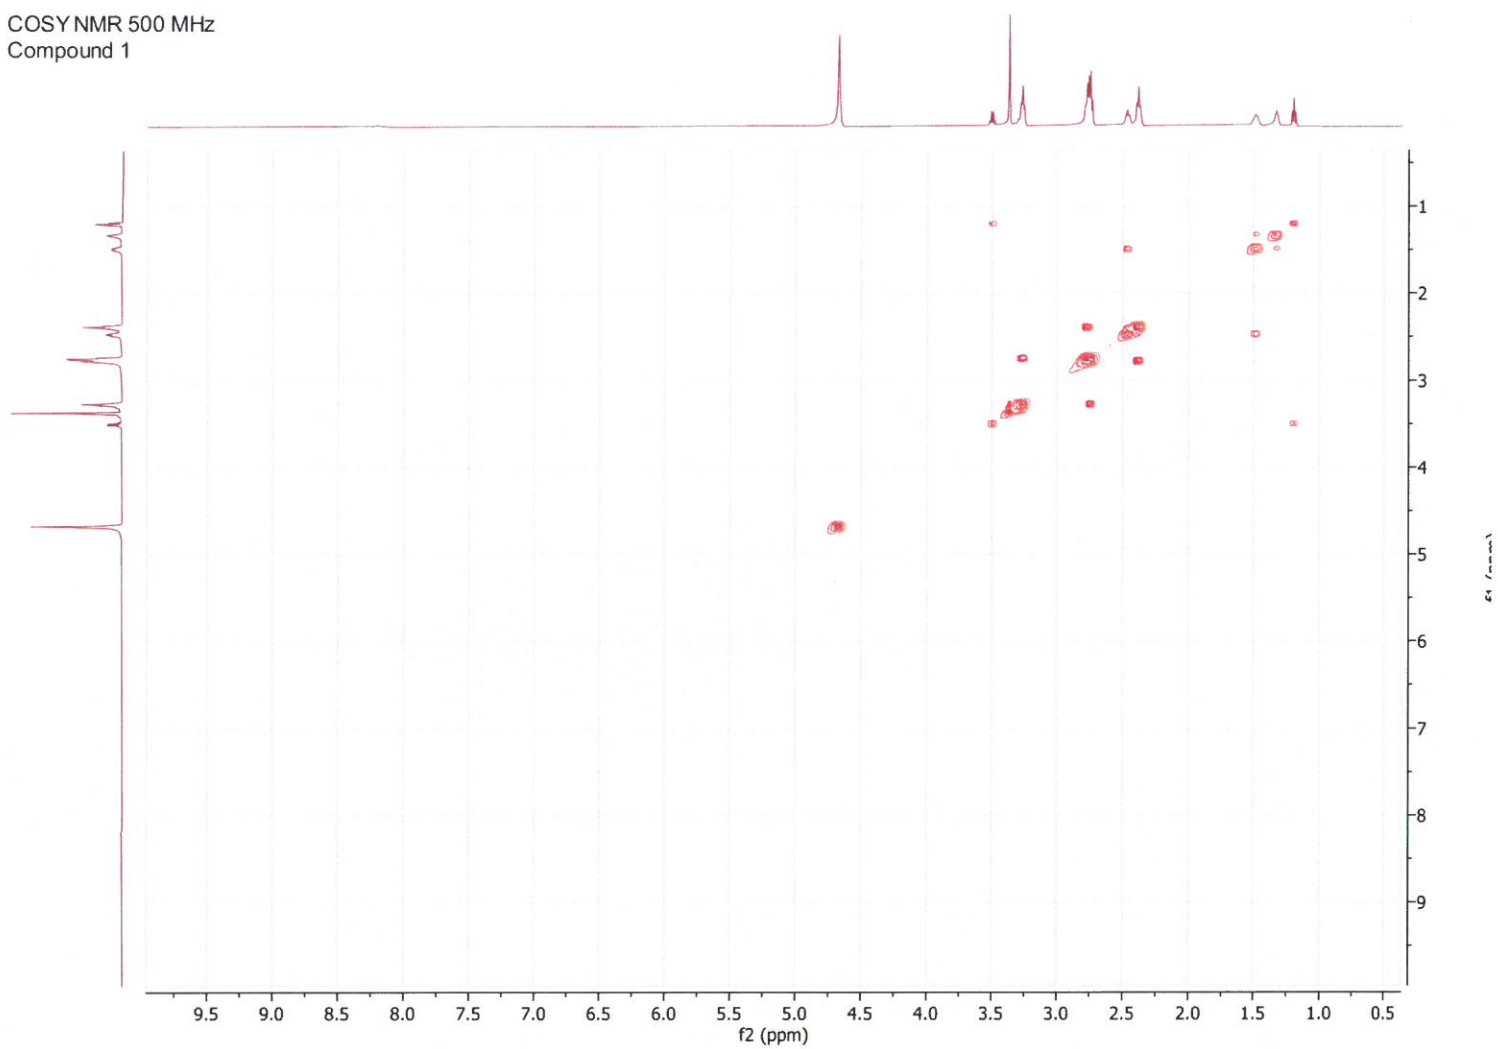

13C NMR 125 MHz  
Compound 1

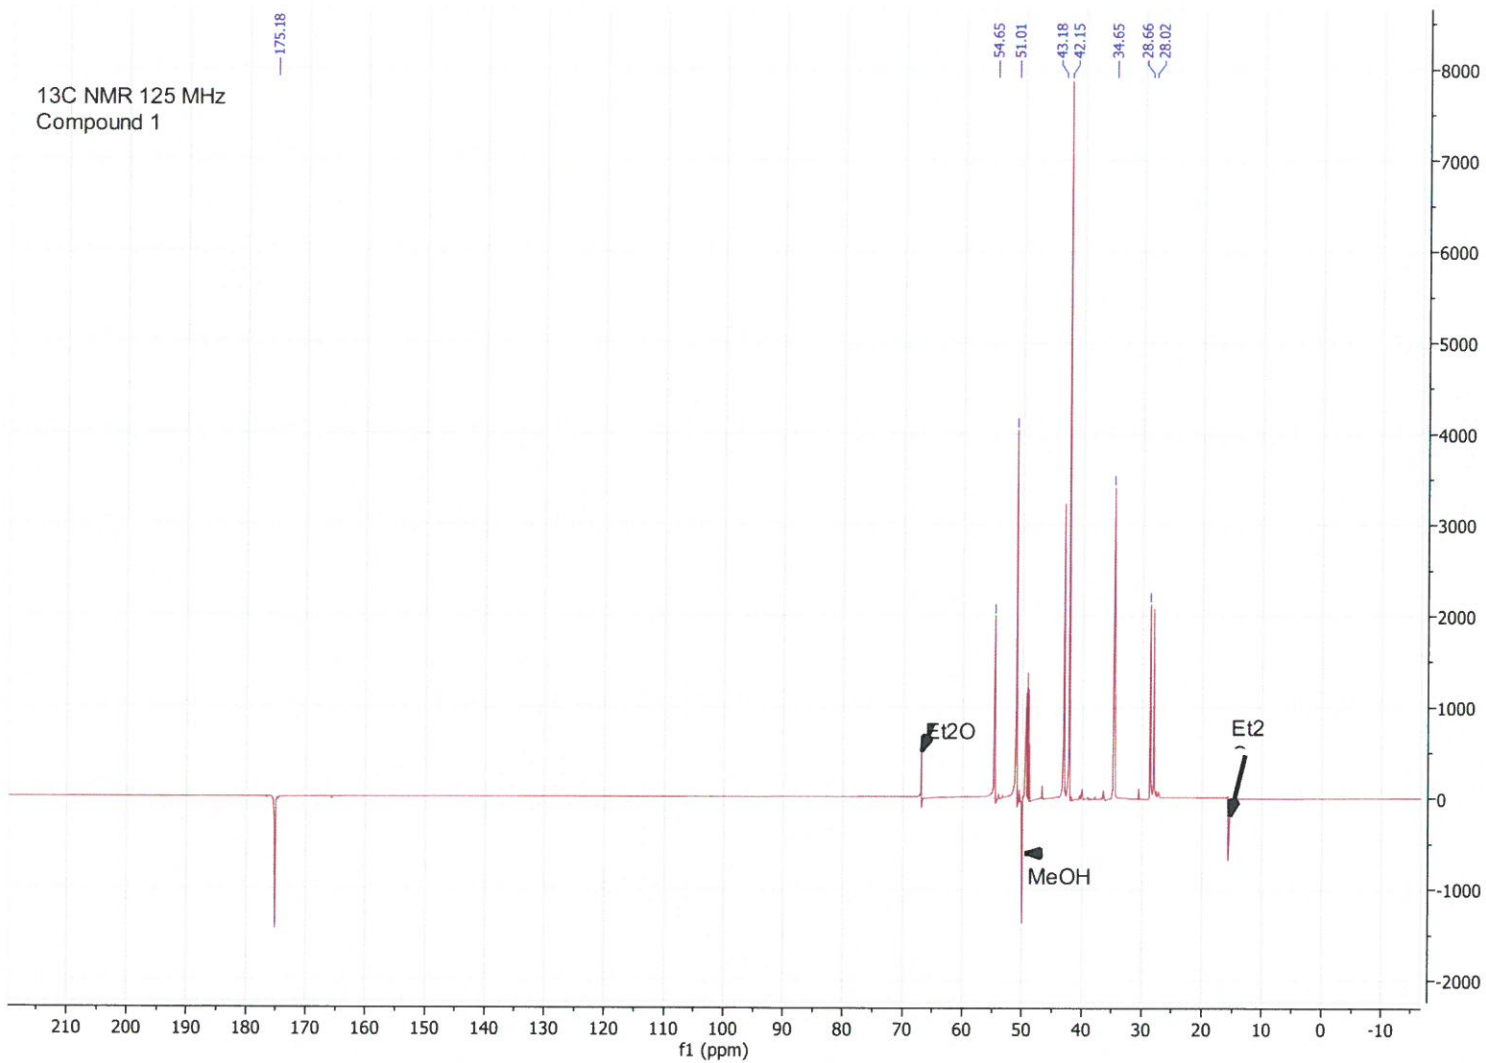

Compound 1

Window Display Report

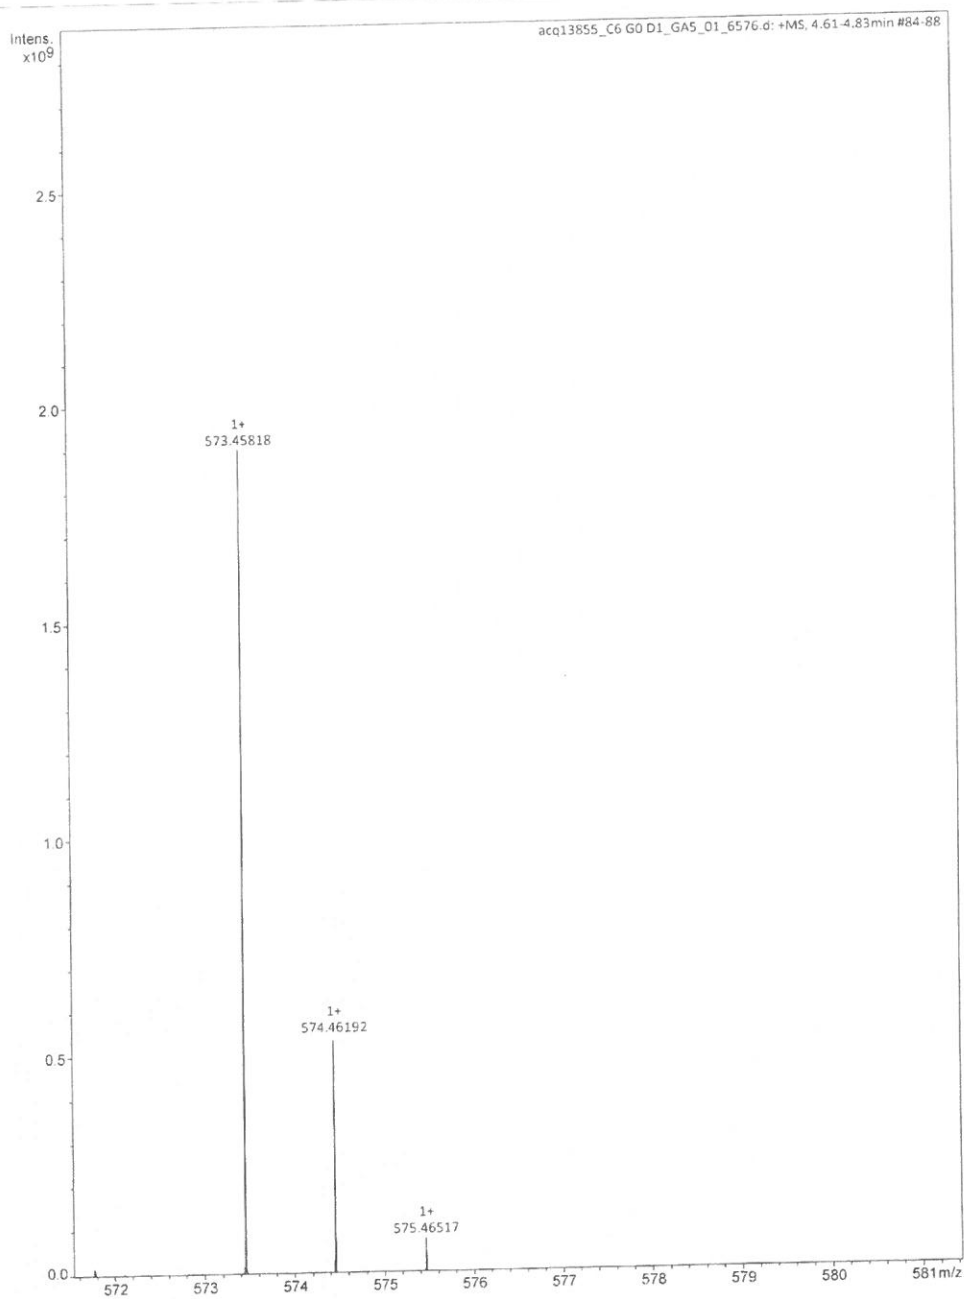

5

1H NMR 500 MHz in CD3OD  
Compound 2

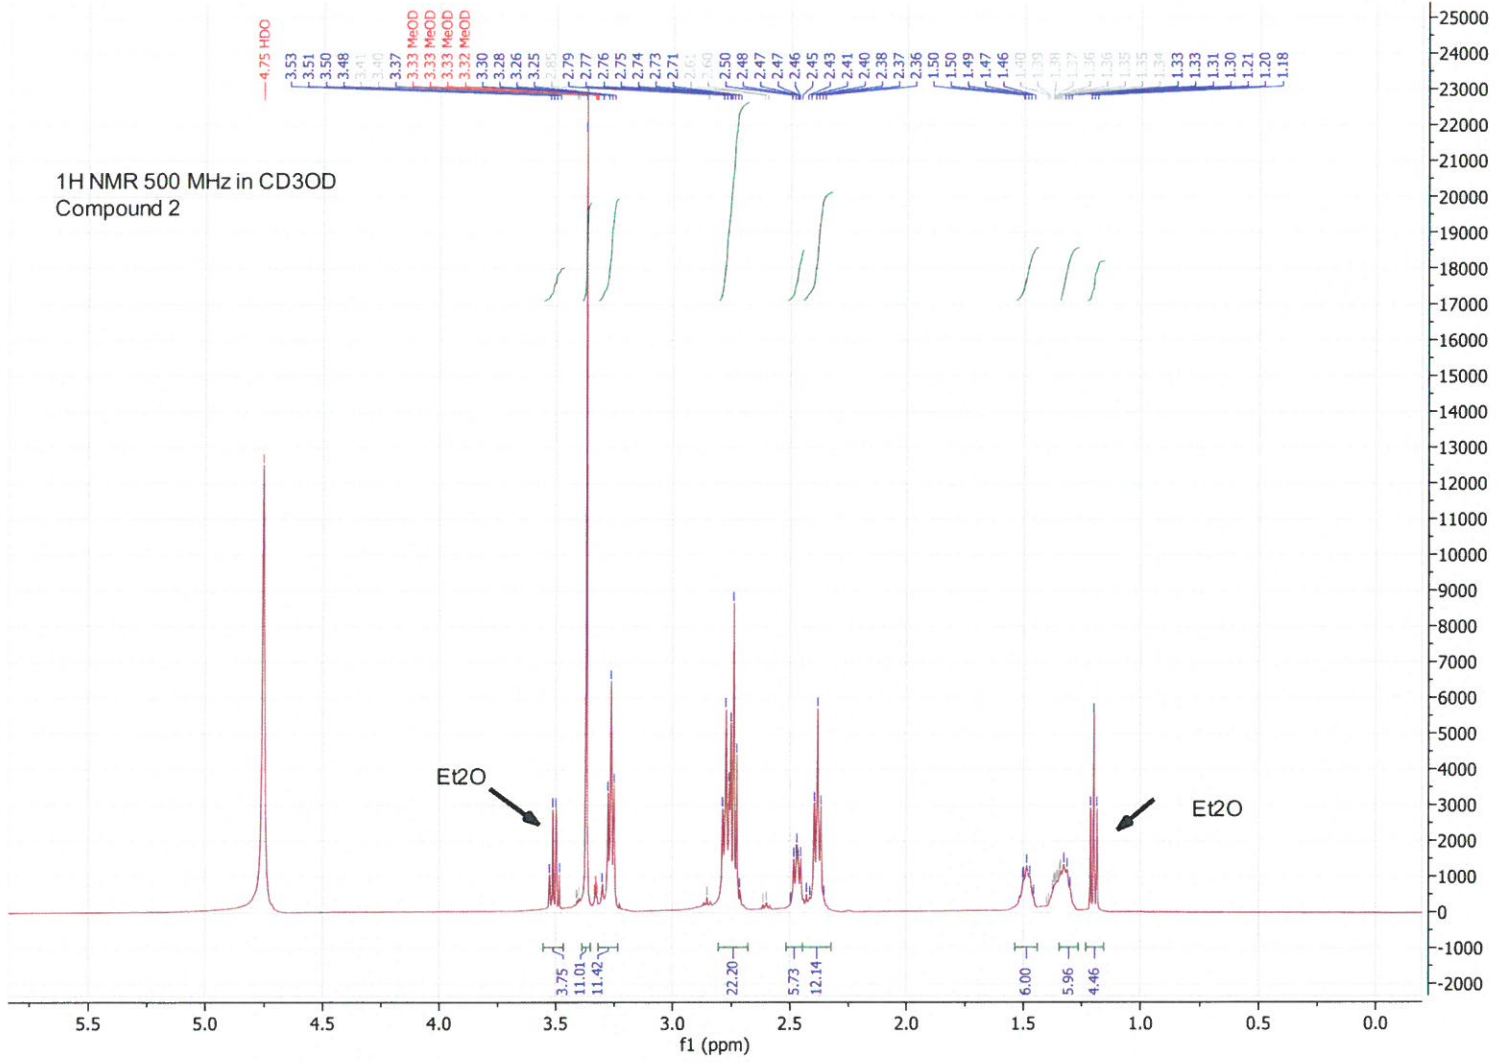

COSY NMR 500 MHz in CD3OD  
Compound 2

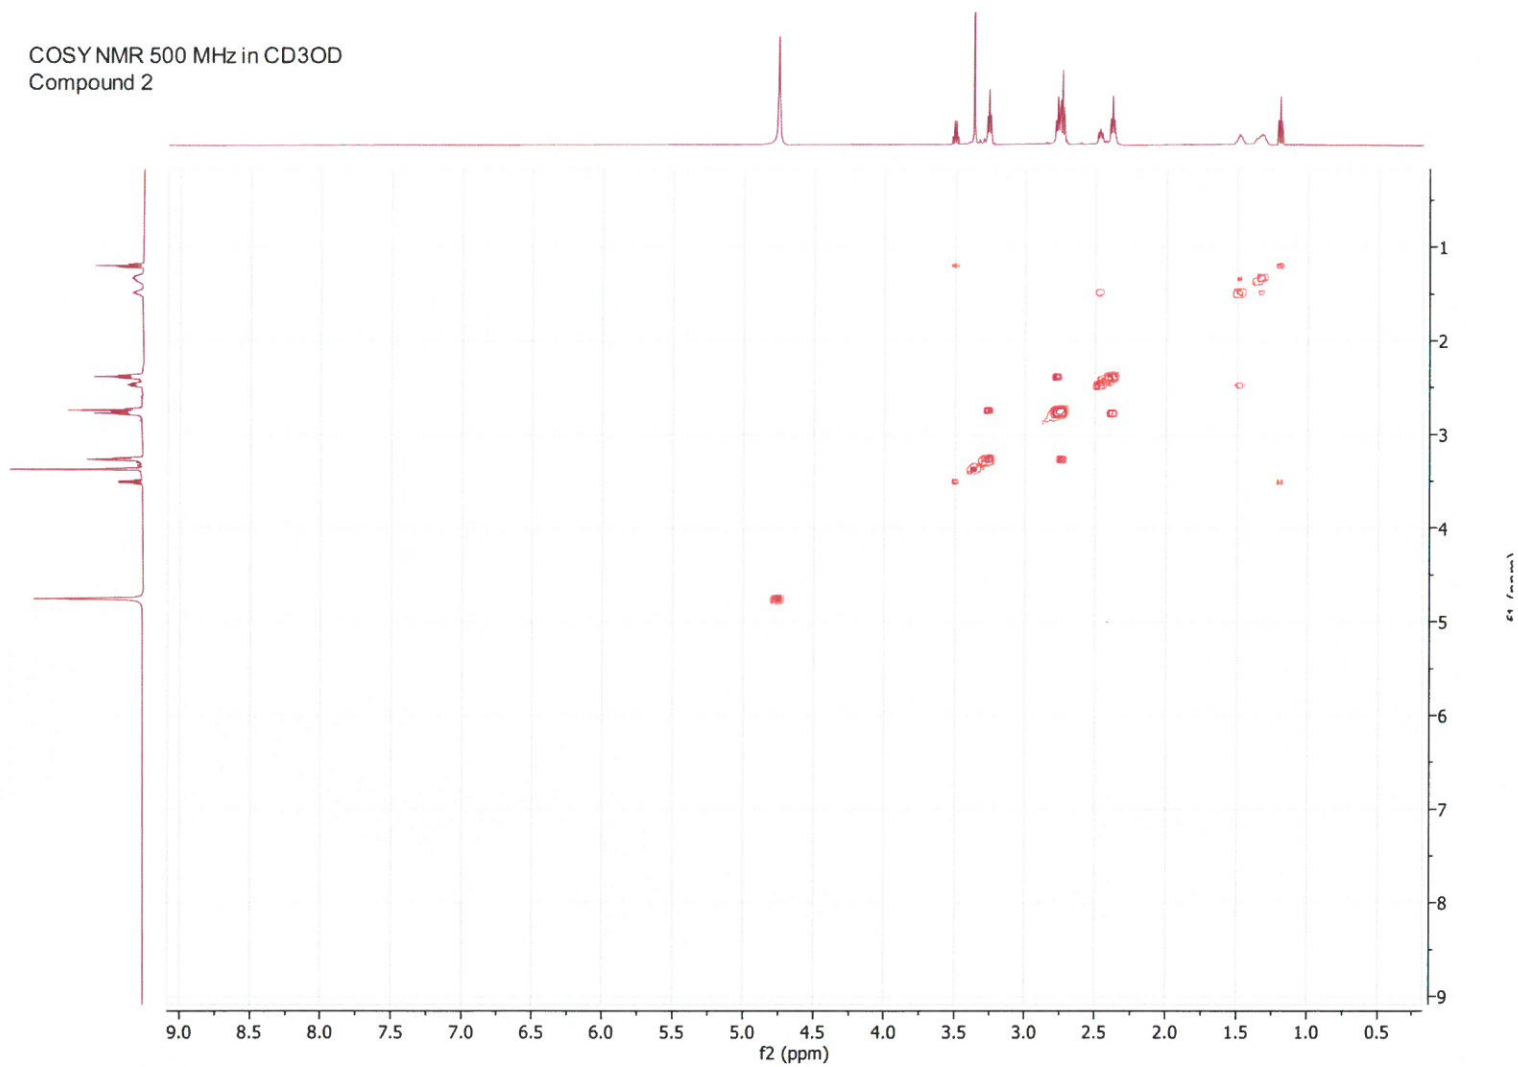

13C NMR 125 MHz in CD3OD  
Compound 2

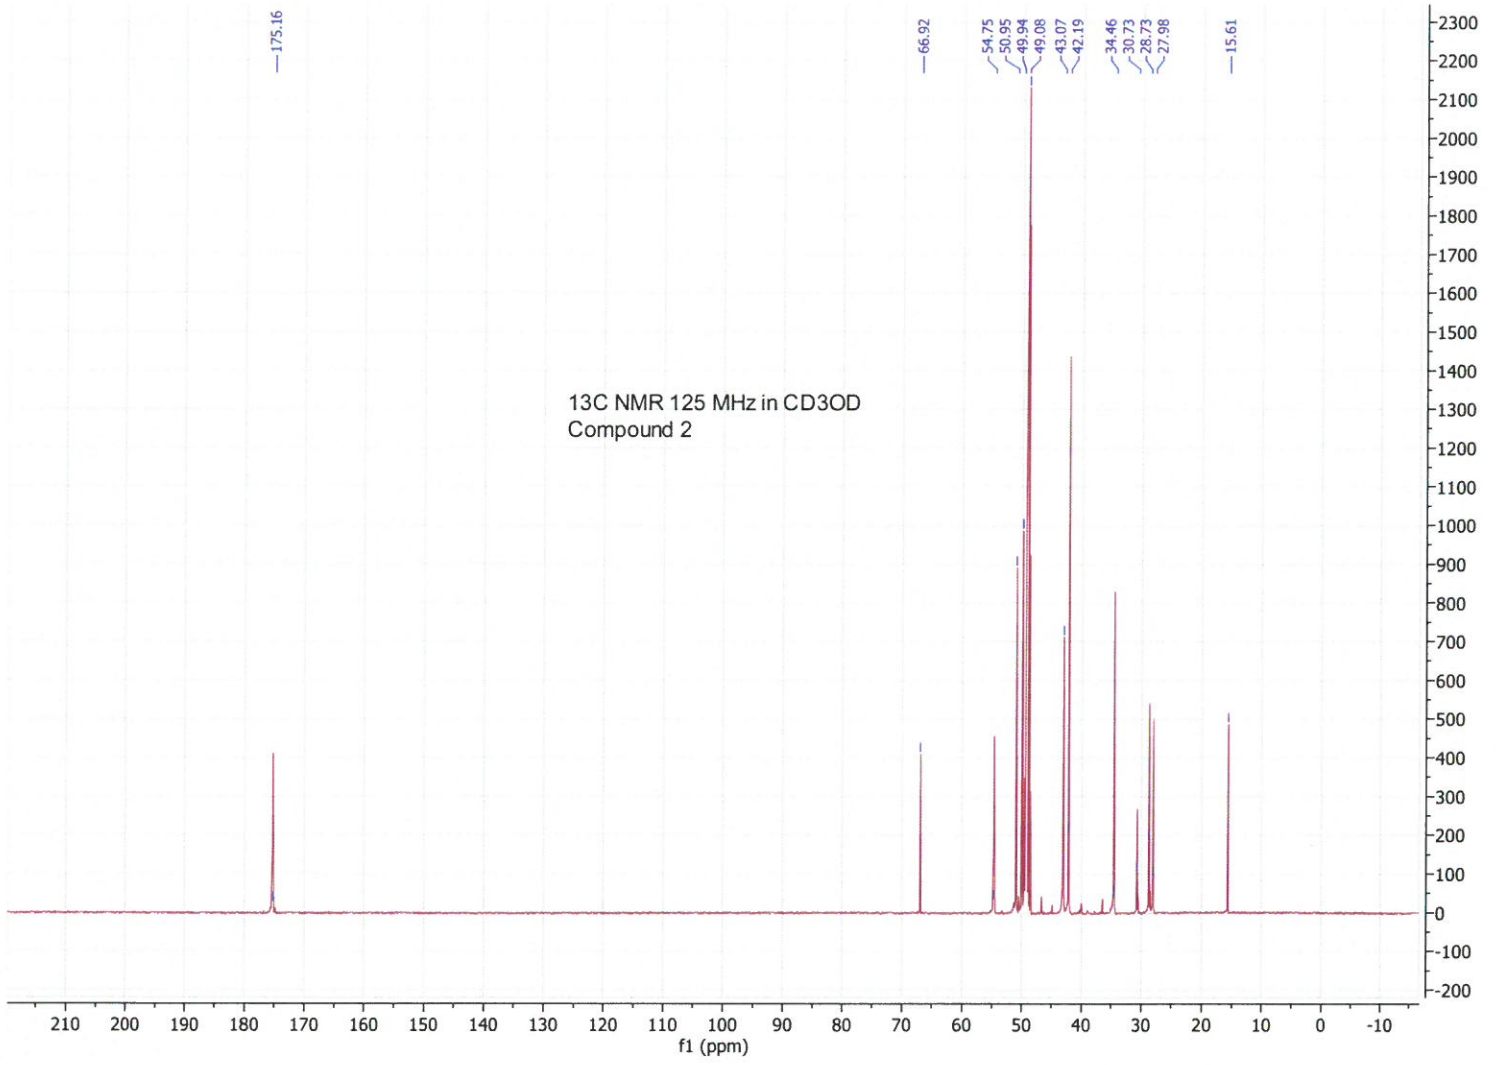

8



Compound 2

Window Display Report

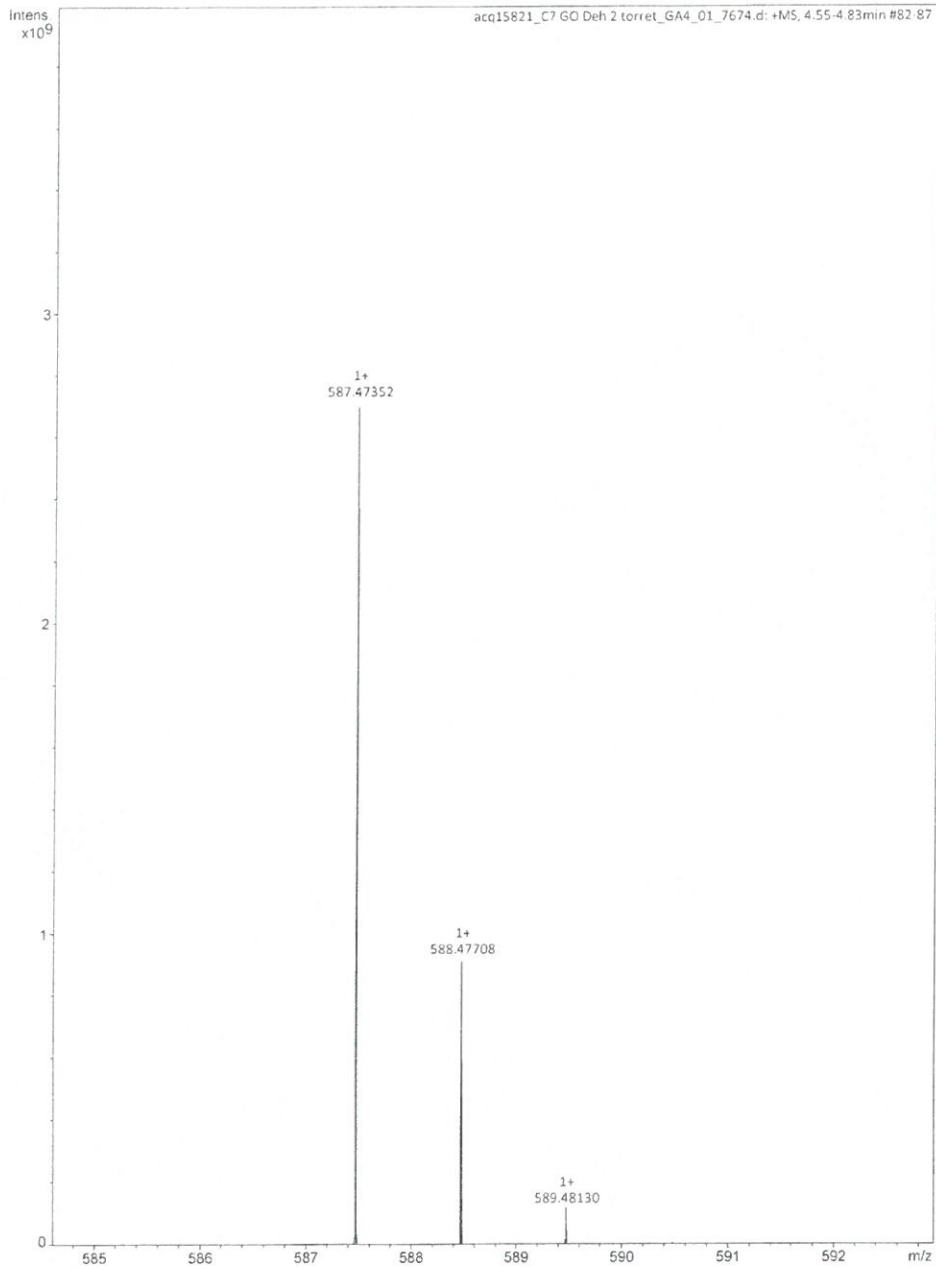

9

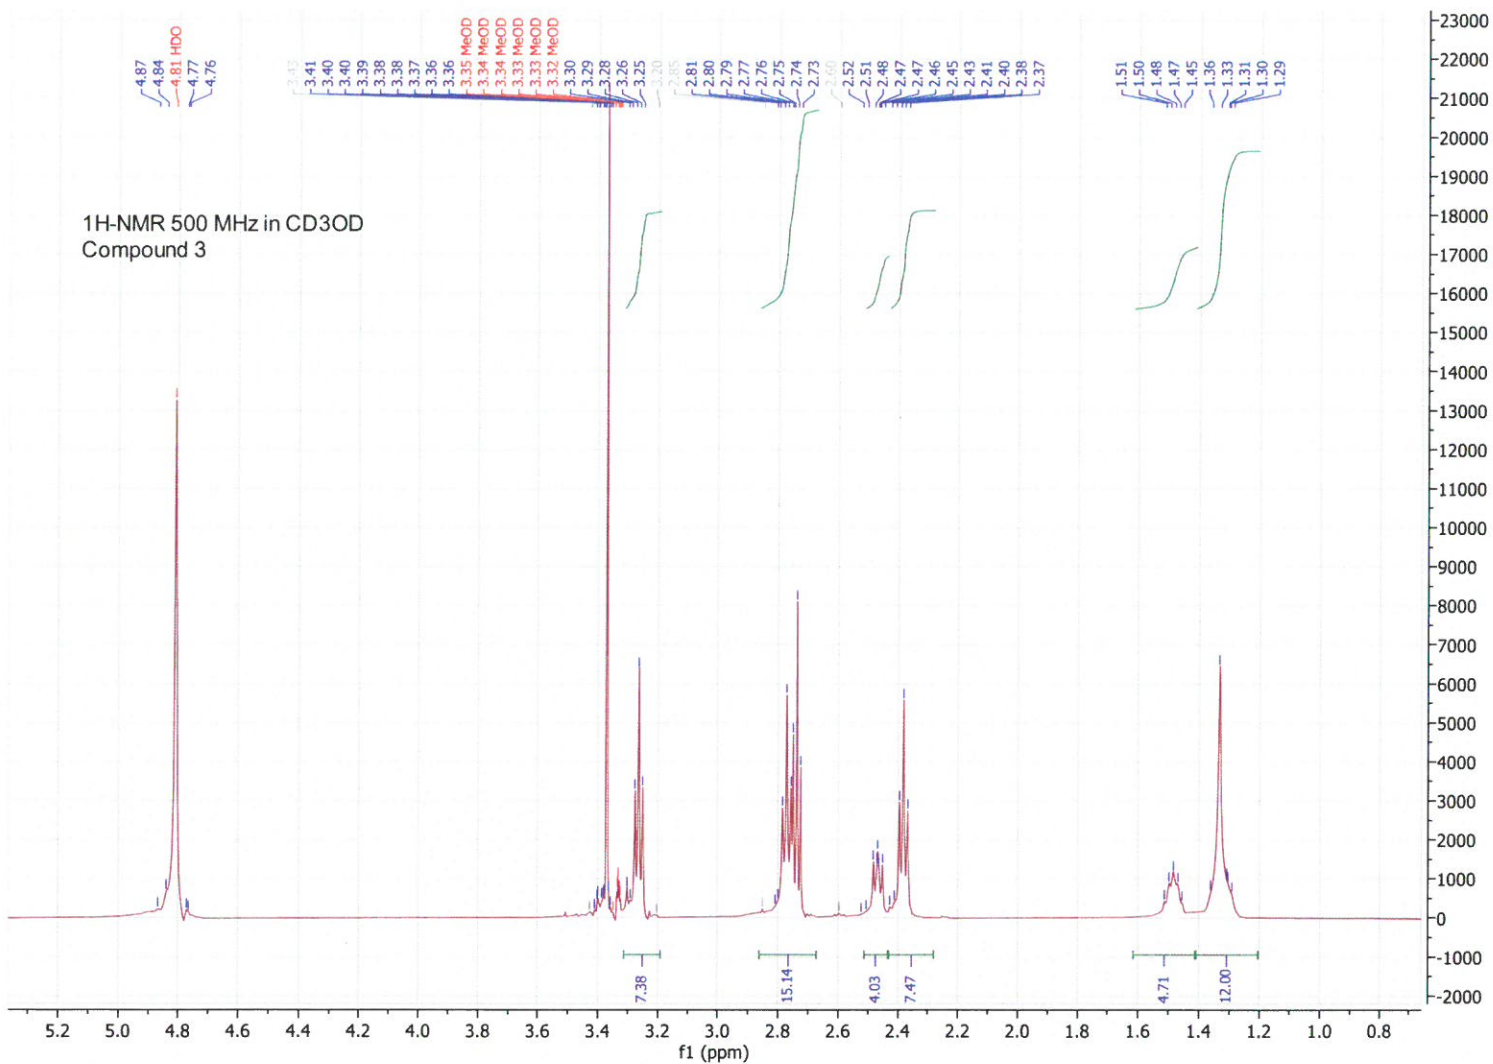

COSY NMR 500 MHz in CD3OD  
Compound 3

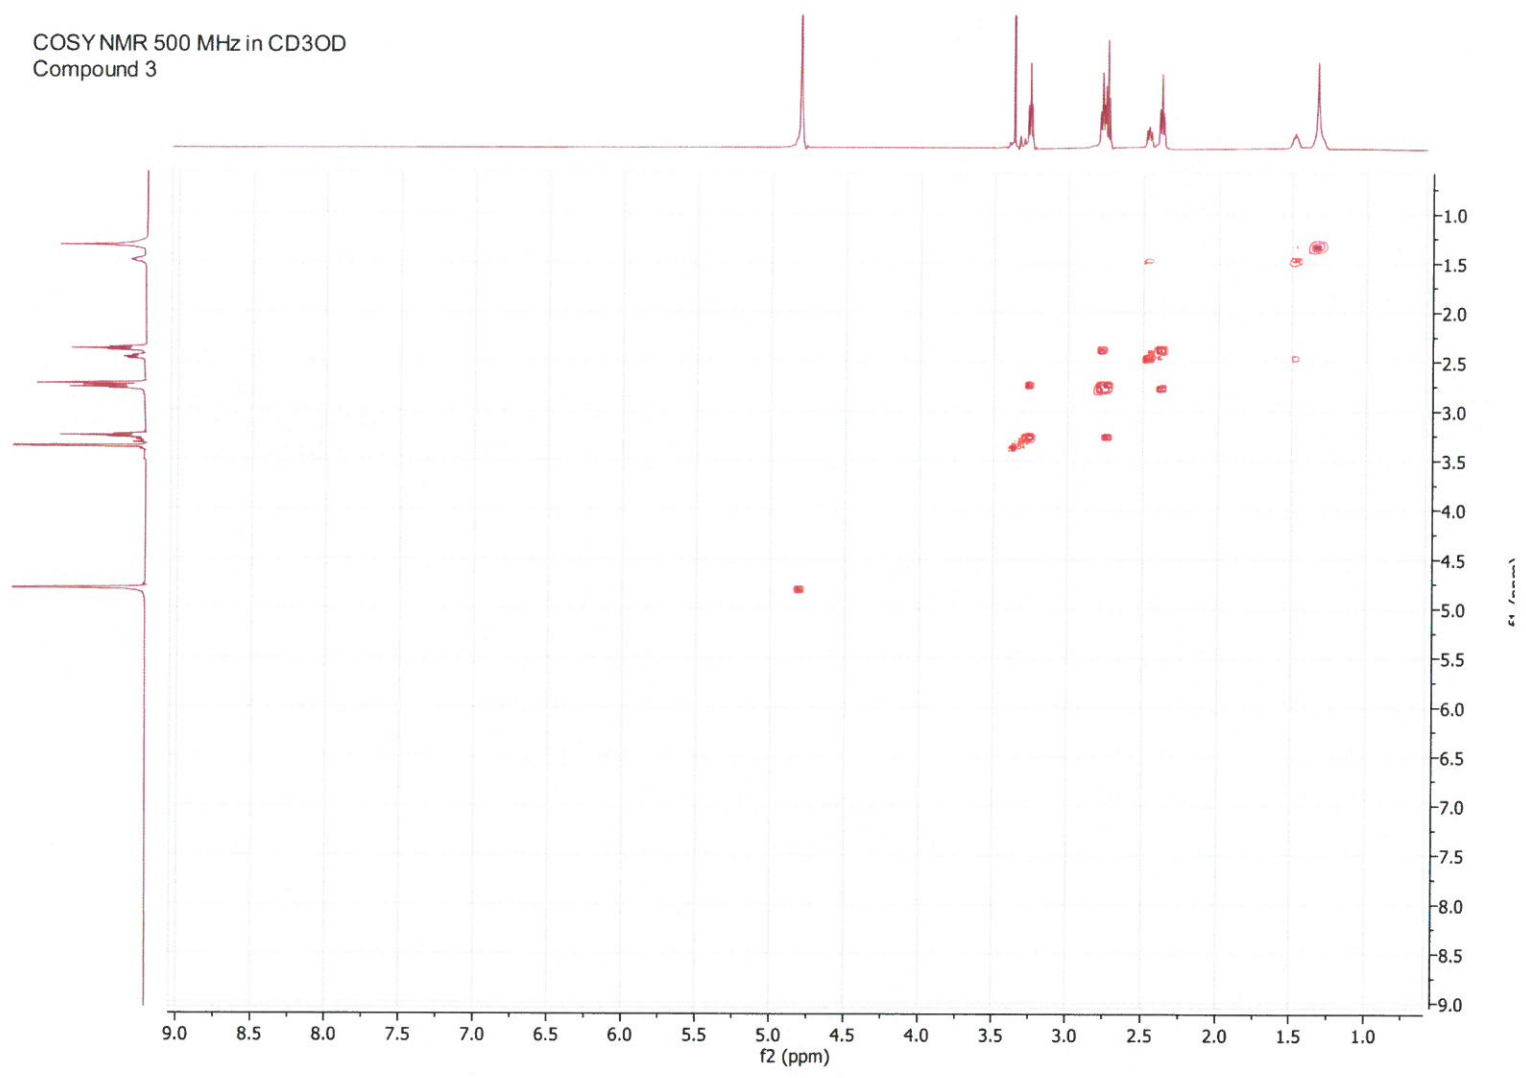

13C-NMR 125 MHz in CD3OD  
Compound 3

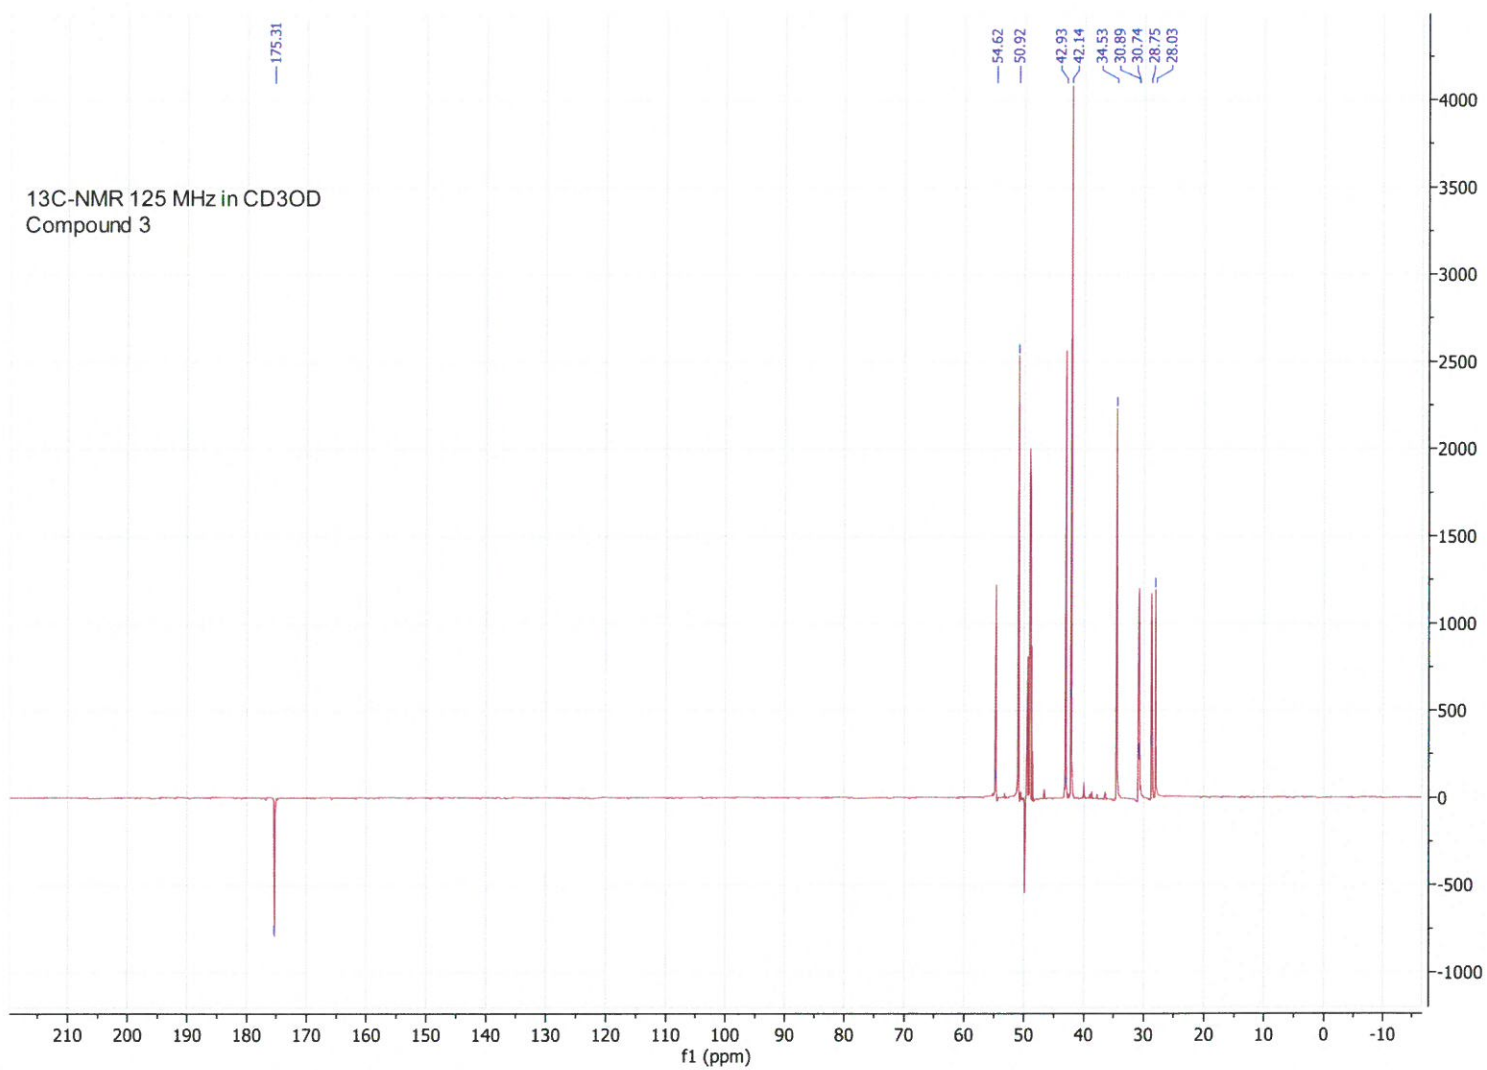

Compound 3

Window Display Report

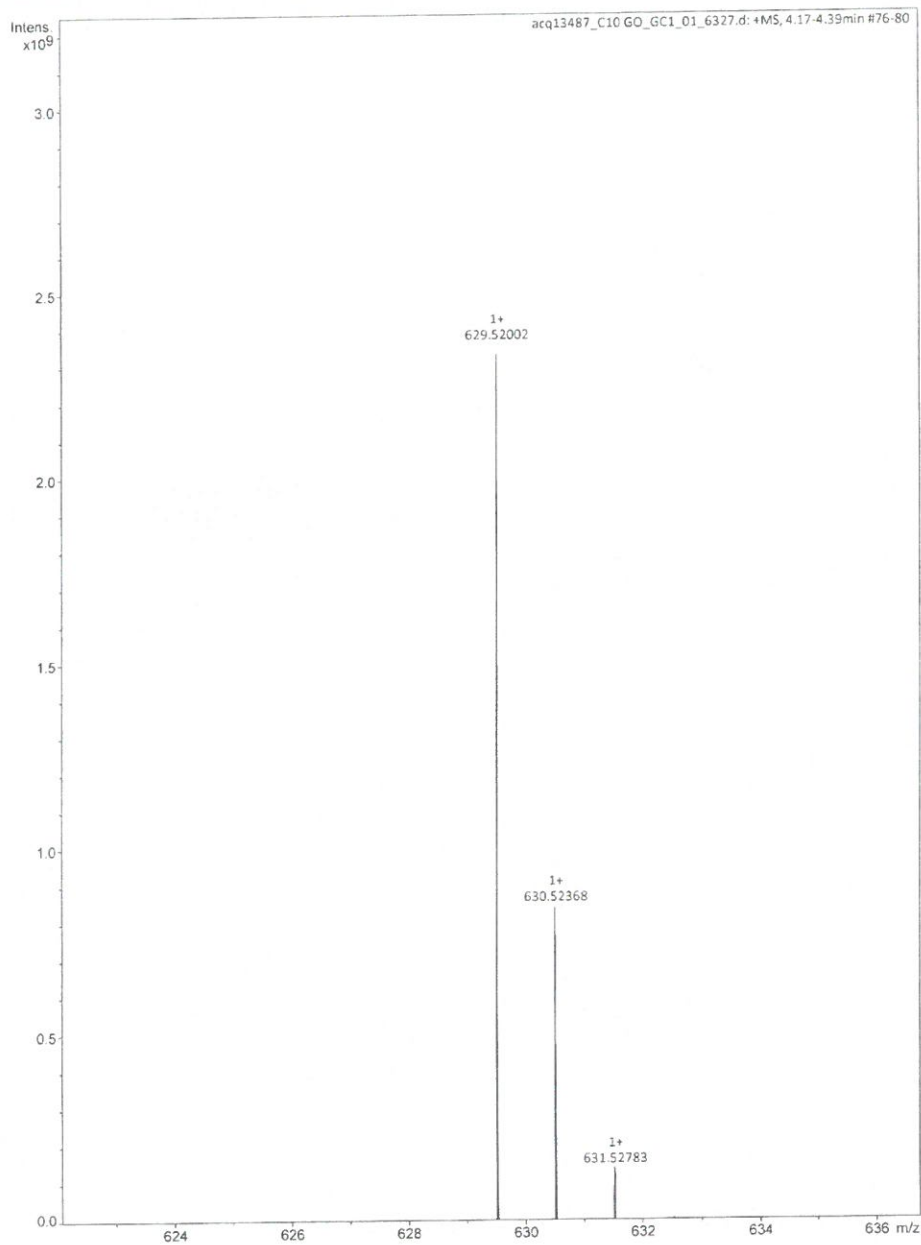

13

1H NMR 500 MHz CD3OD  
Compound 4

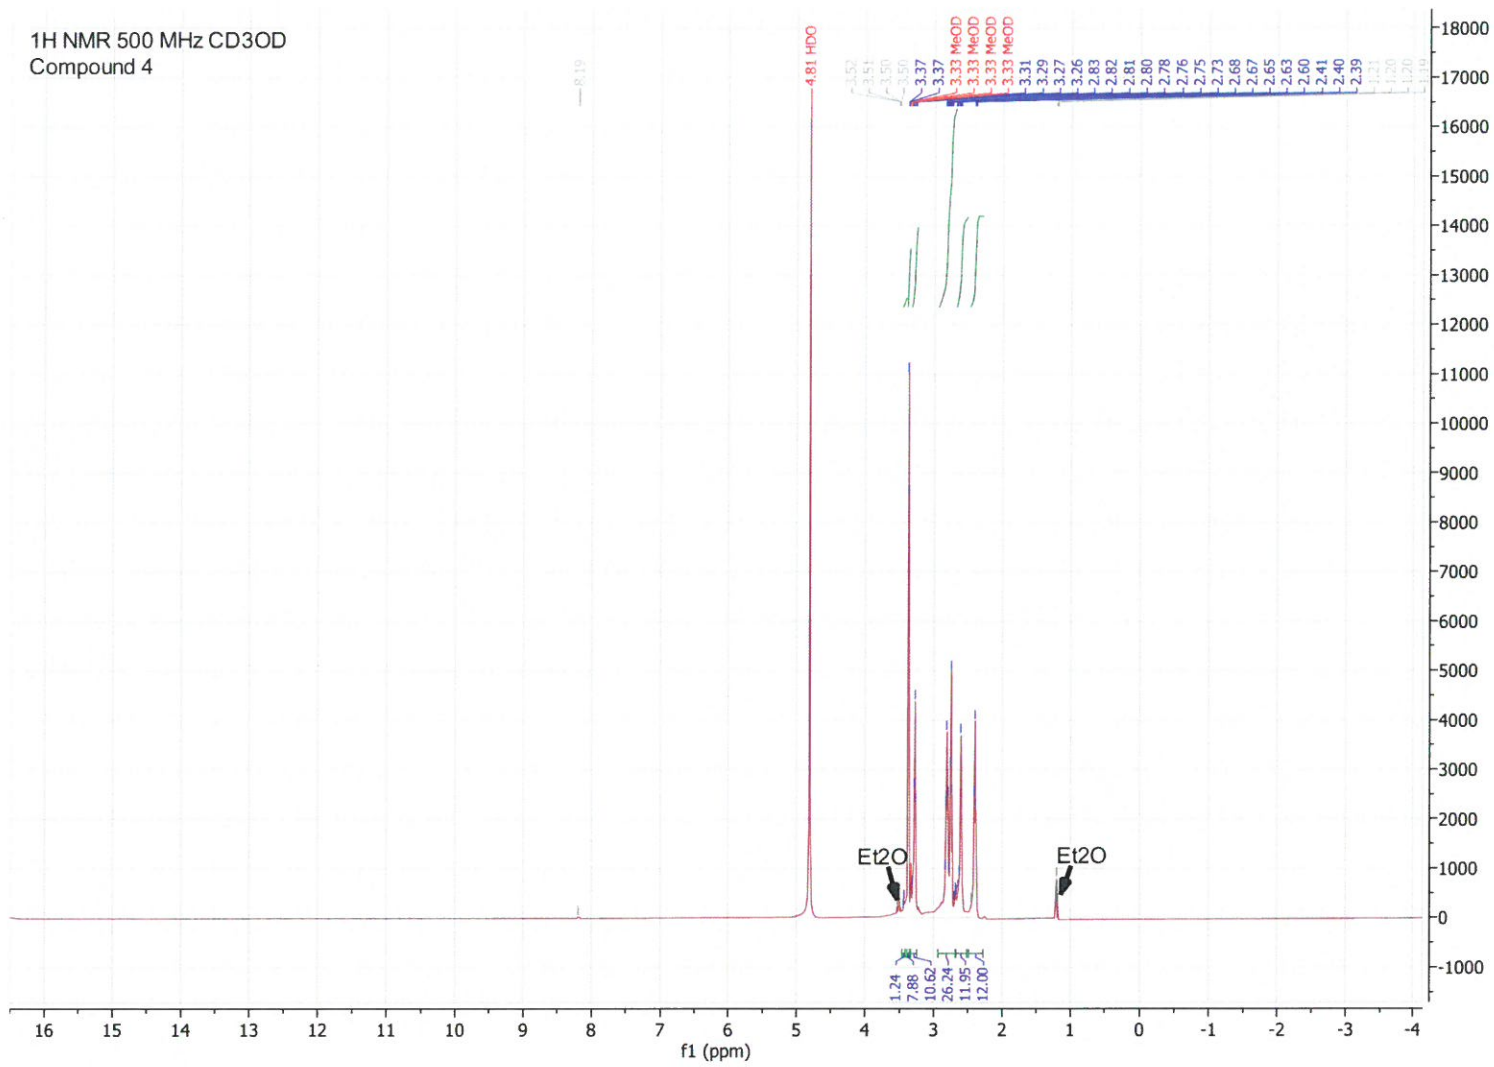

COSY NMR 500 MHz CD3OD  
Compound 4

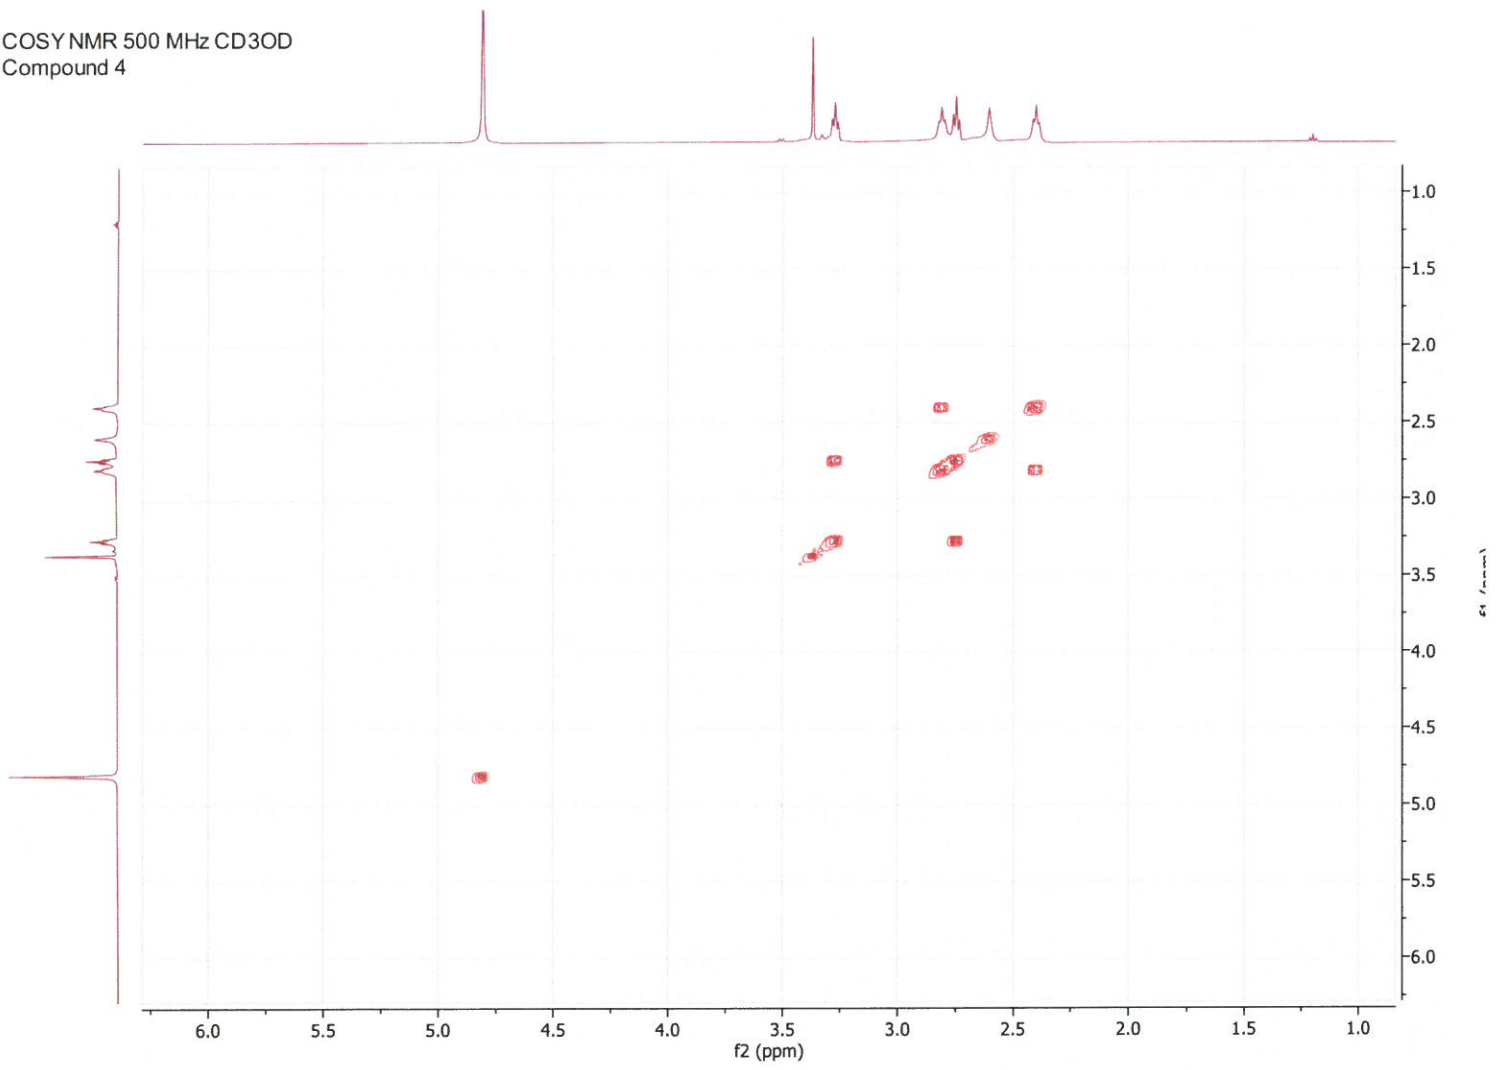

<sup>13</sup>C NMR 125 MHz CD<sub>3</sub>OD  
Compound 4

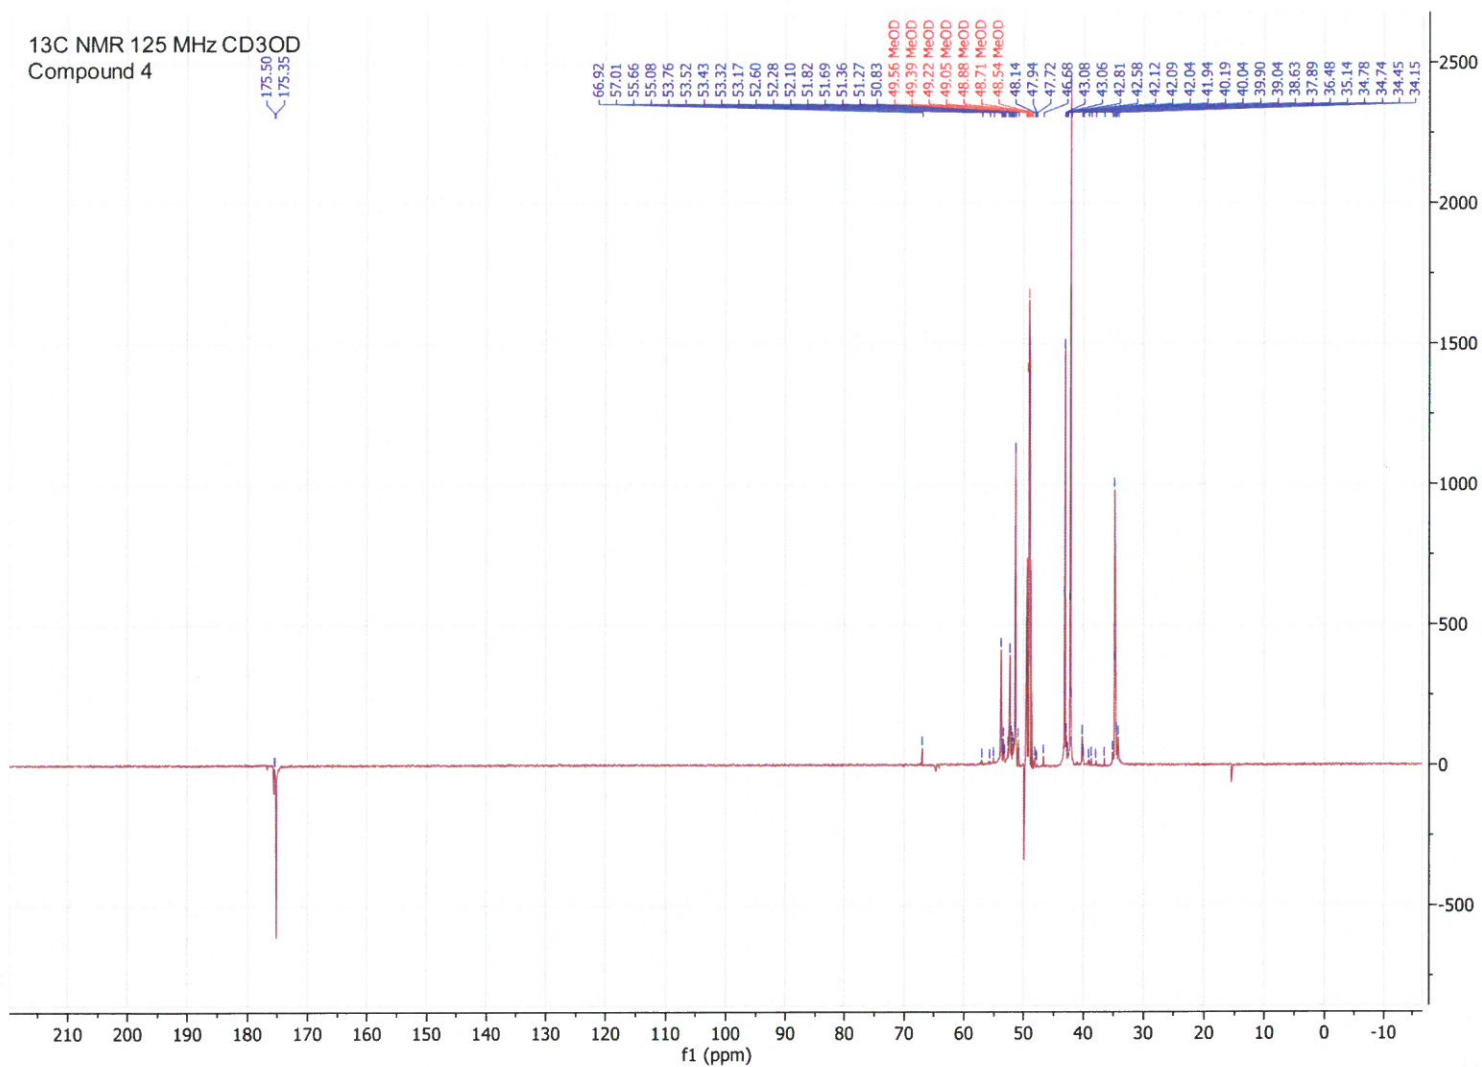



Compound 4

Window Display Report

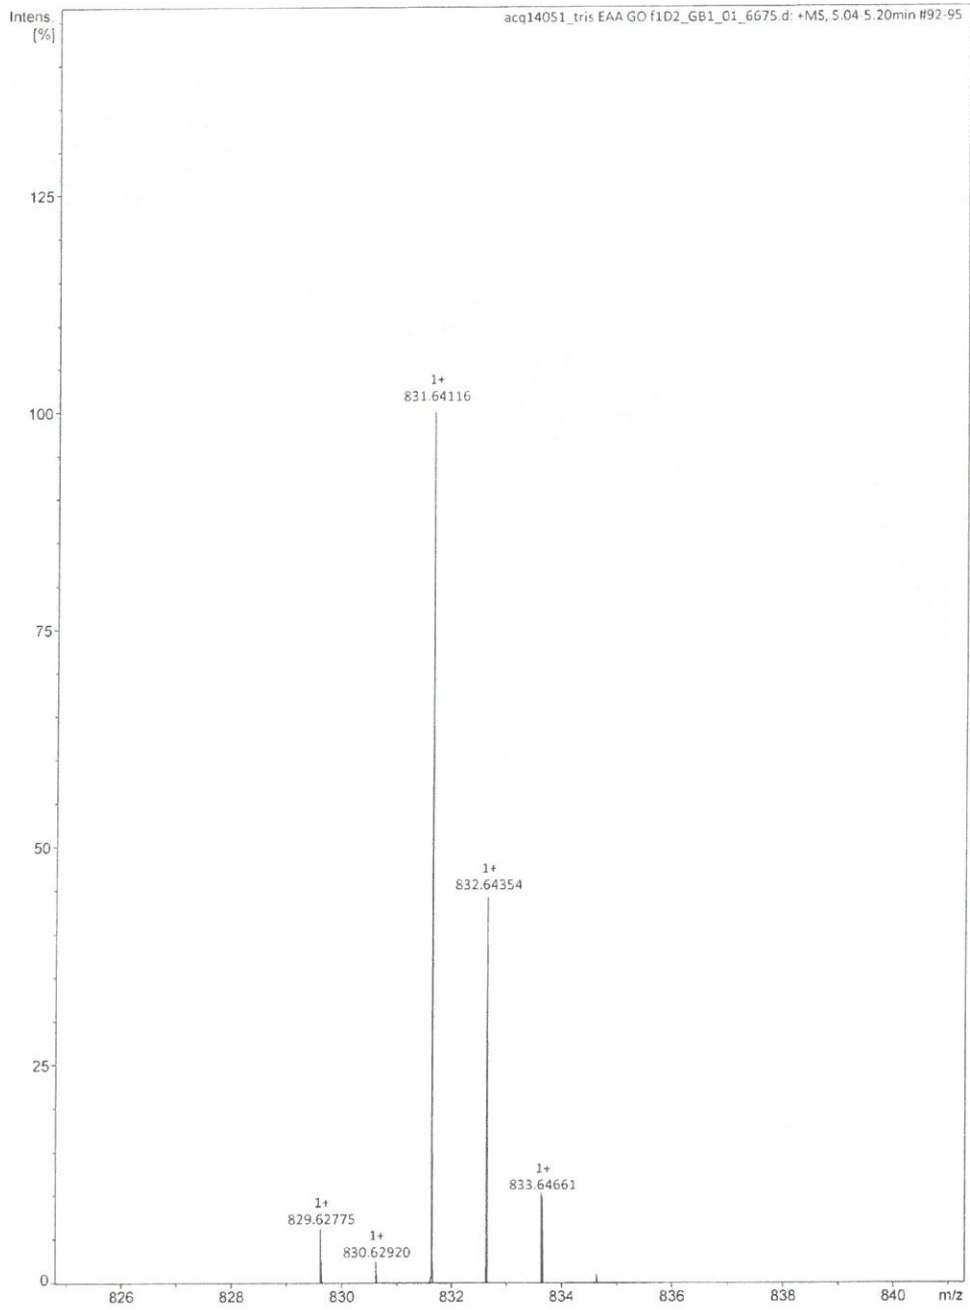

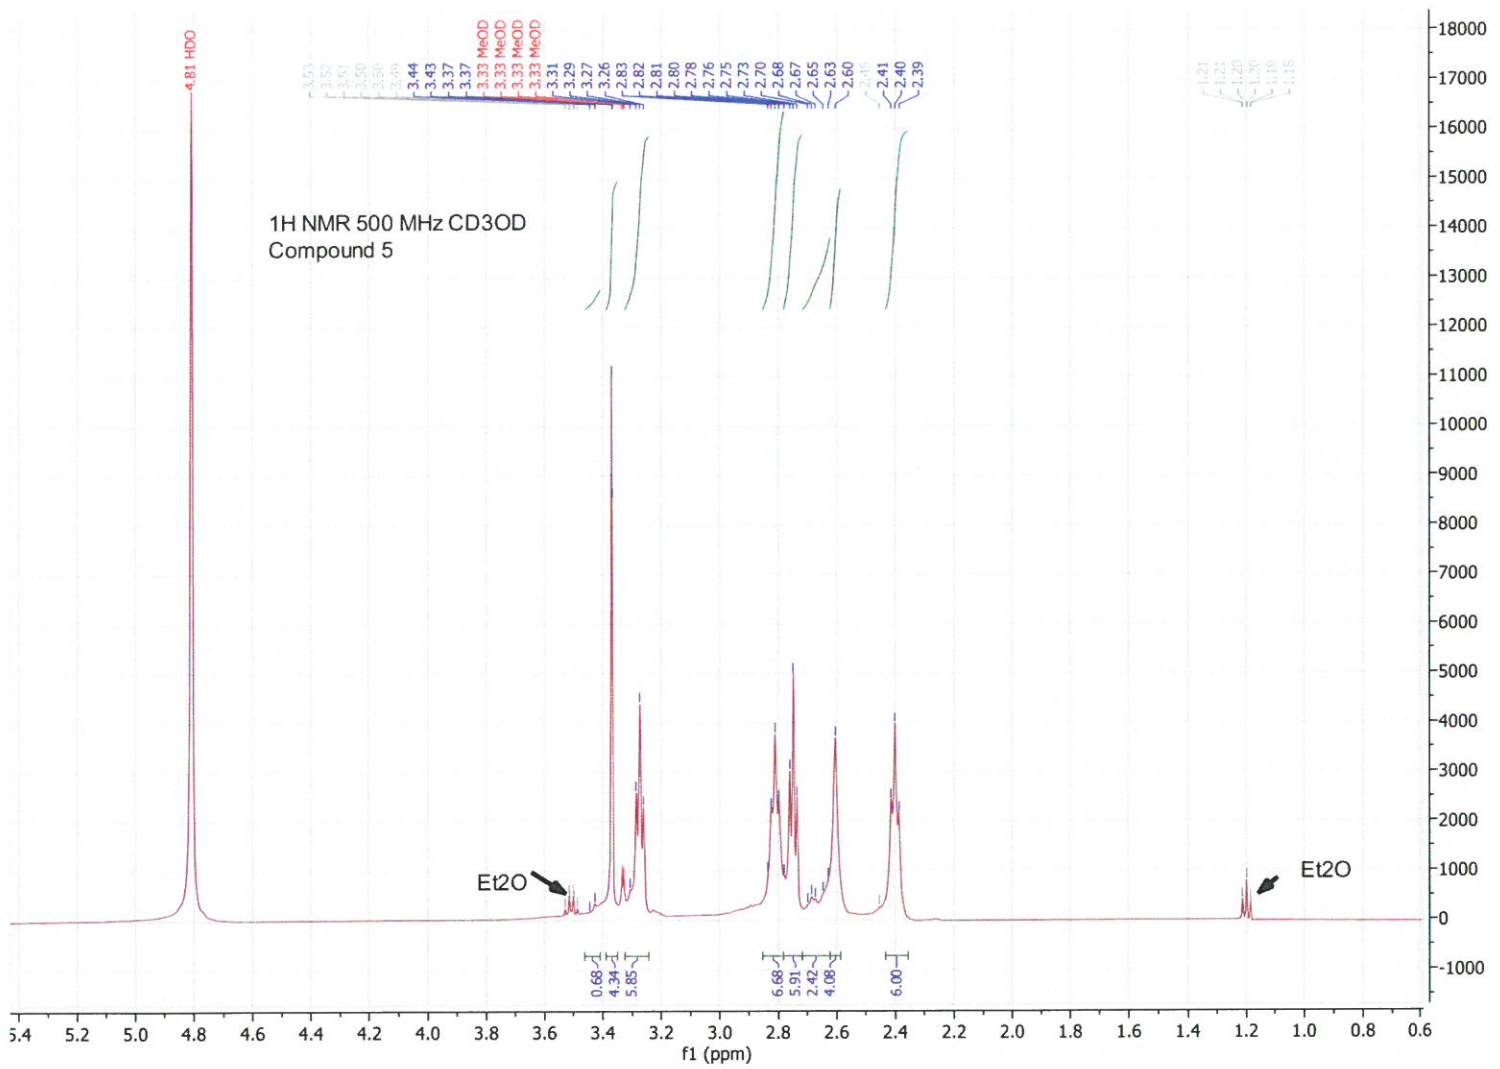

COSY NMR 500 MHz CD3OD  
Compound 5

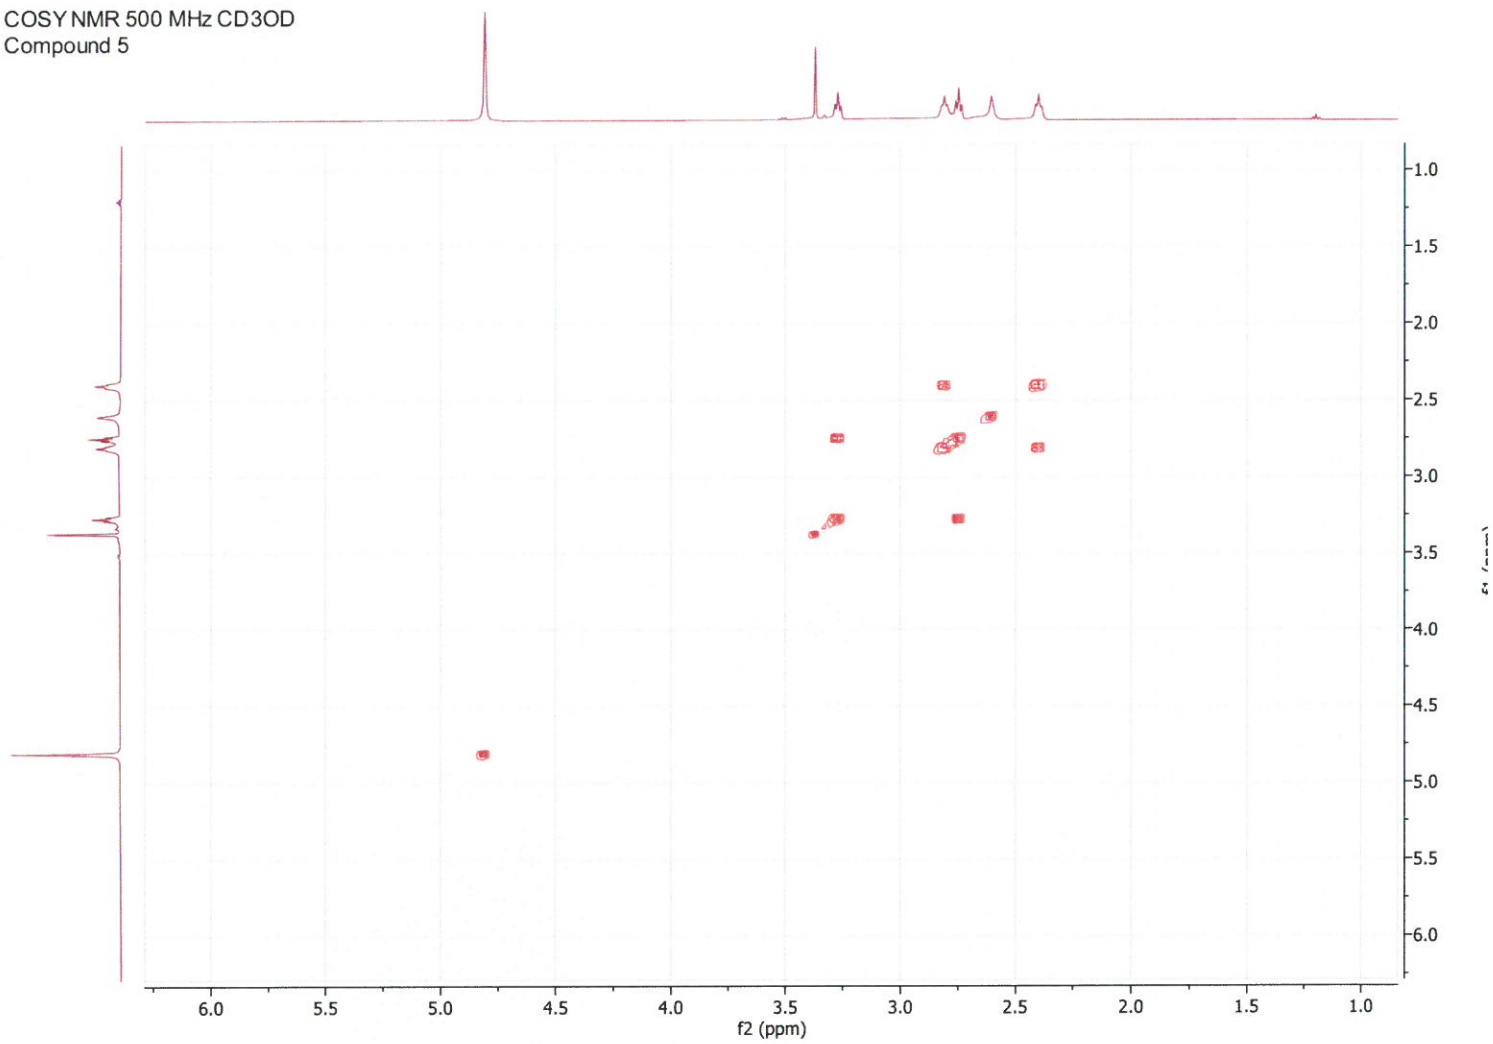

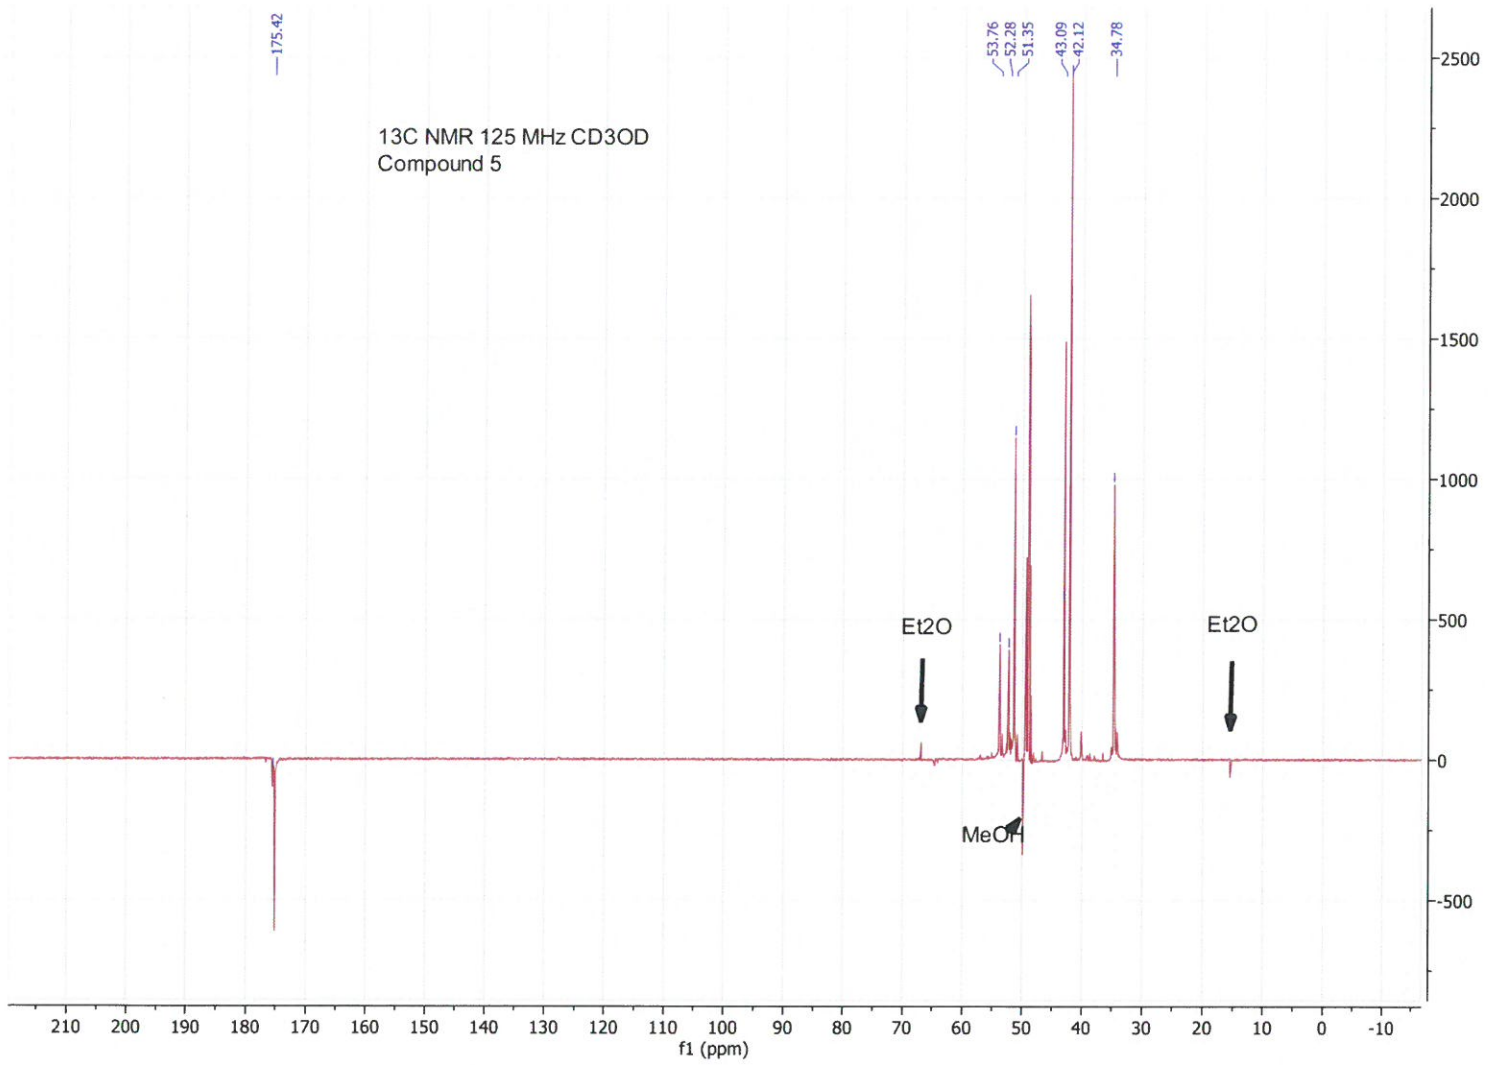

Compound 5

Window Display Report

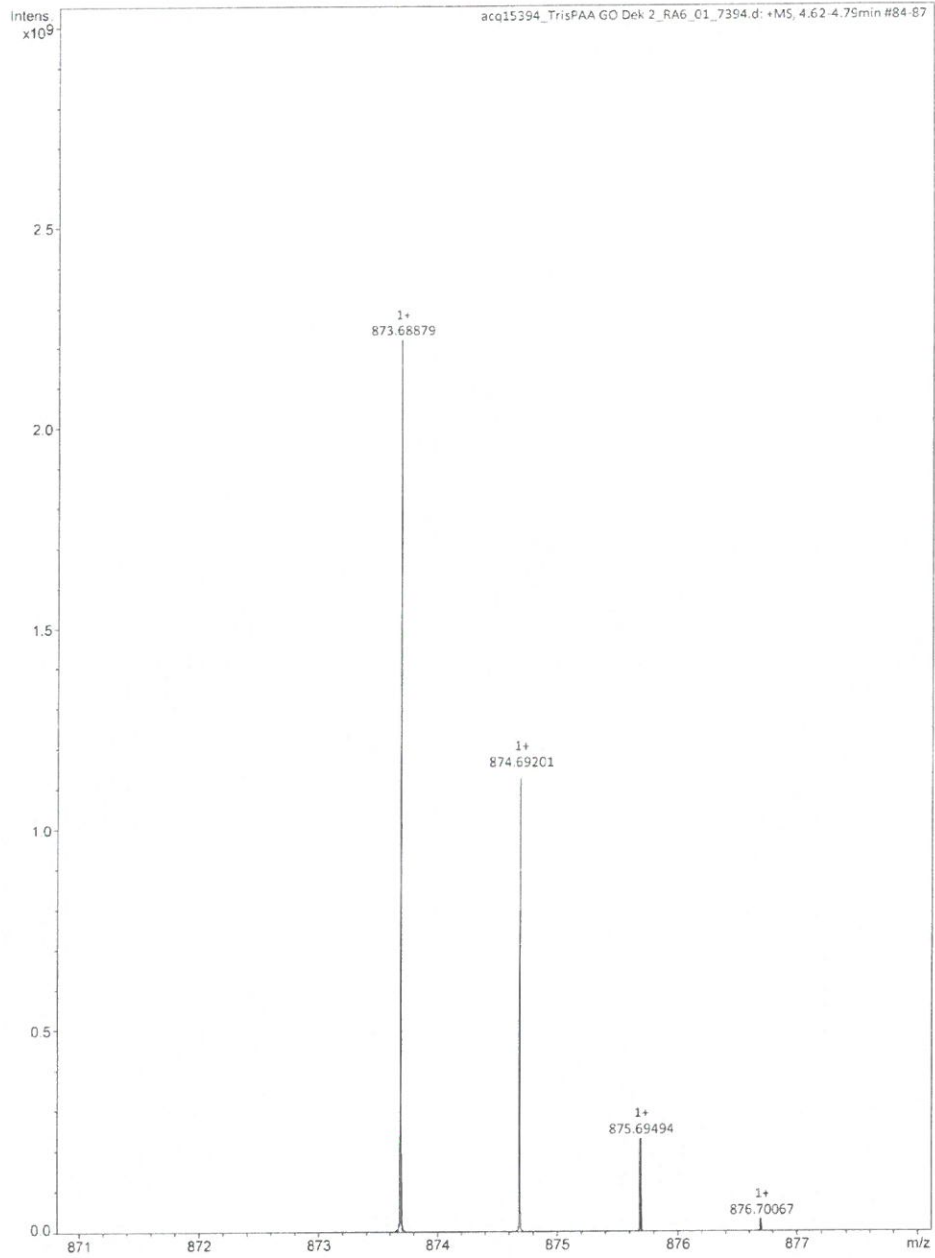

1H NMR 500 MHz CD3OD  
Compound 6

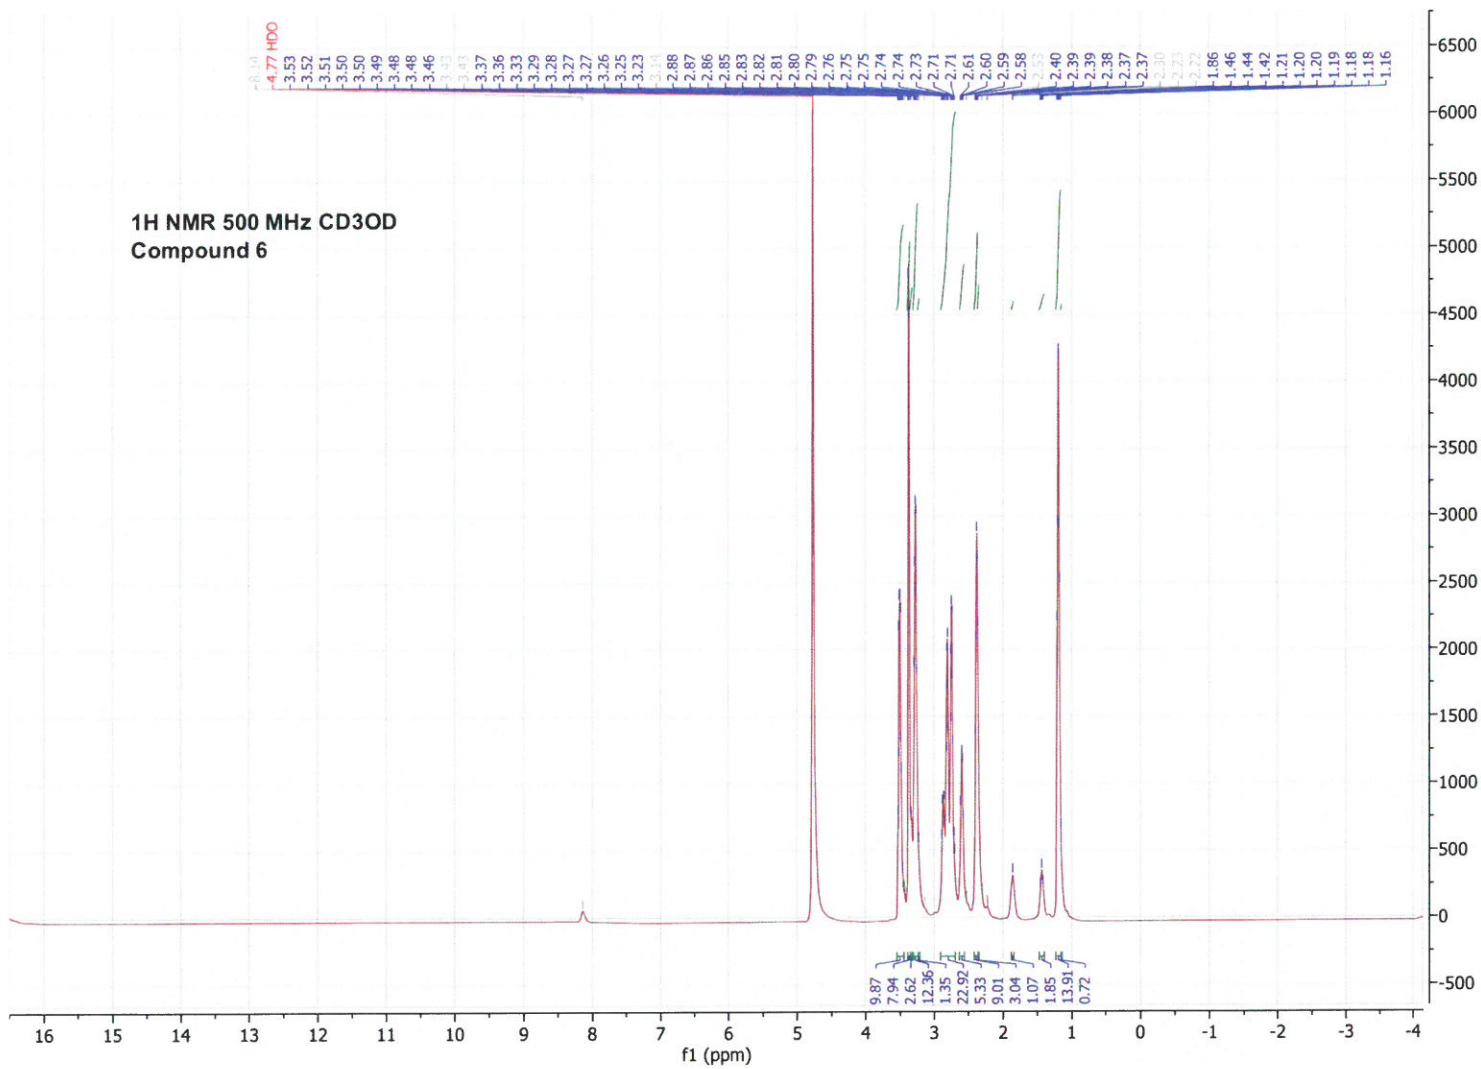

COSY NMR 500 MHz CD3OD  
Compound 6

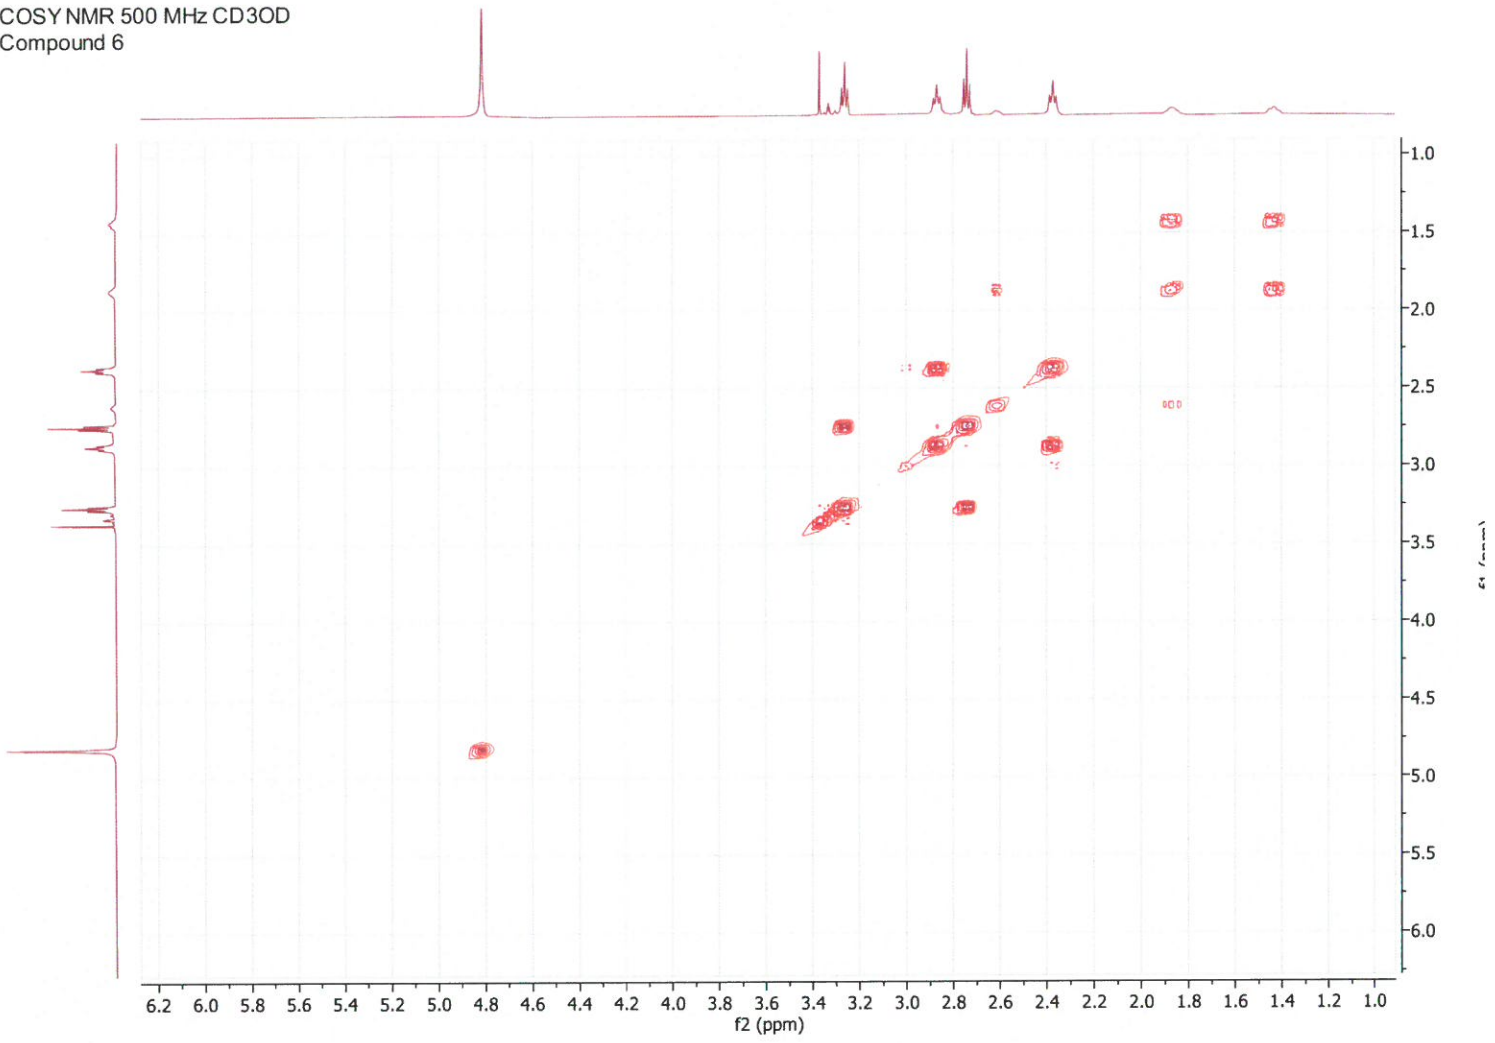

13C NMR 125 MHz CD3OD  
Compound 6

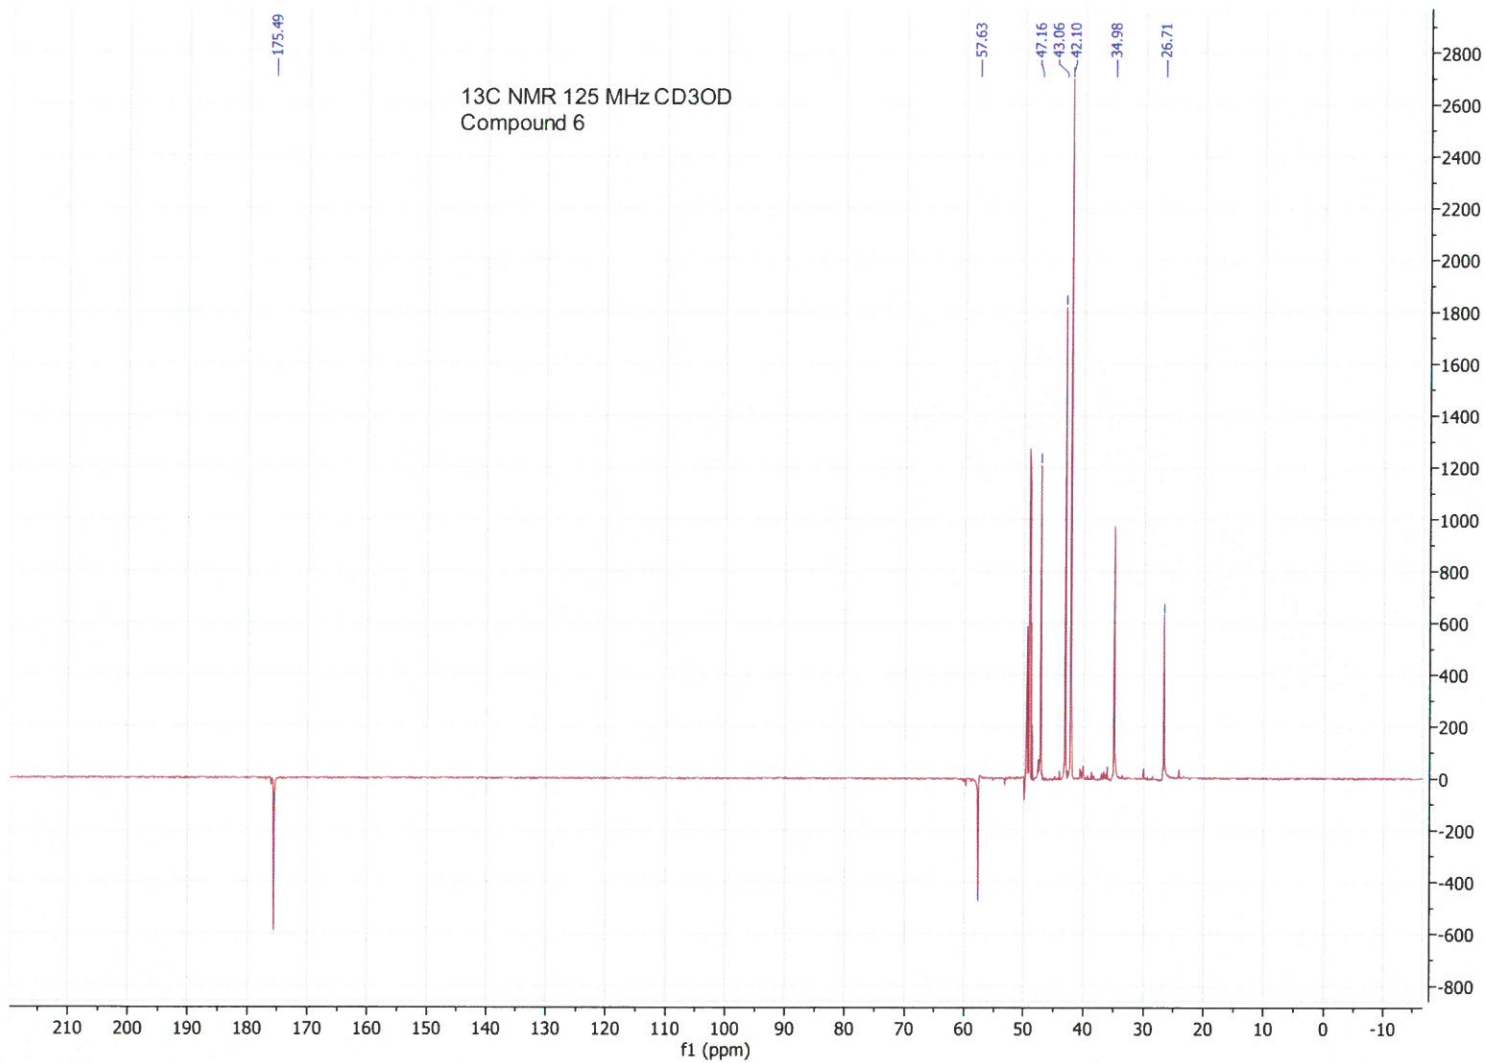

24



Compound 6

Window Display Report

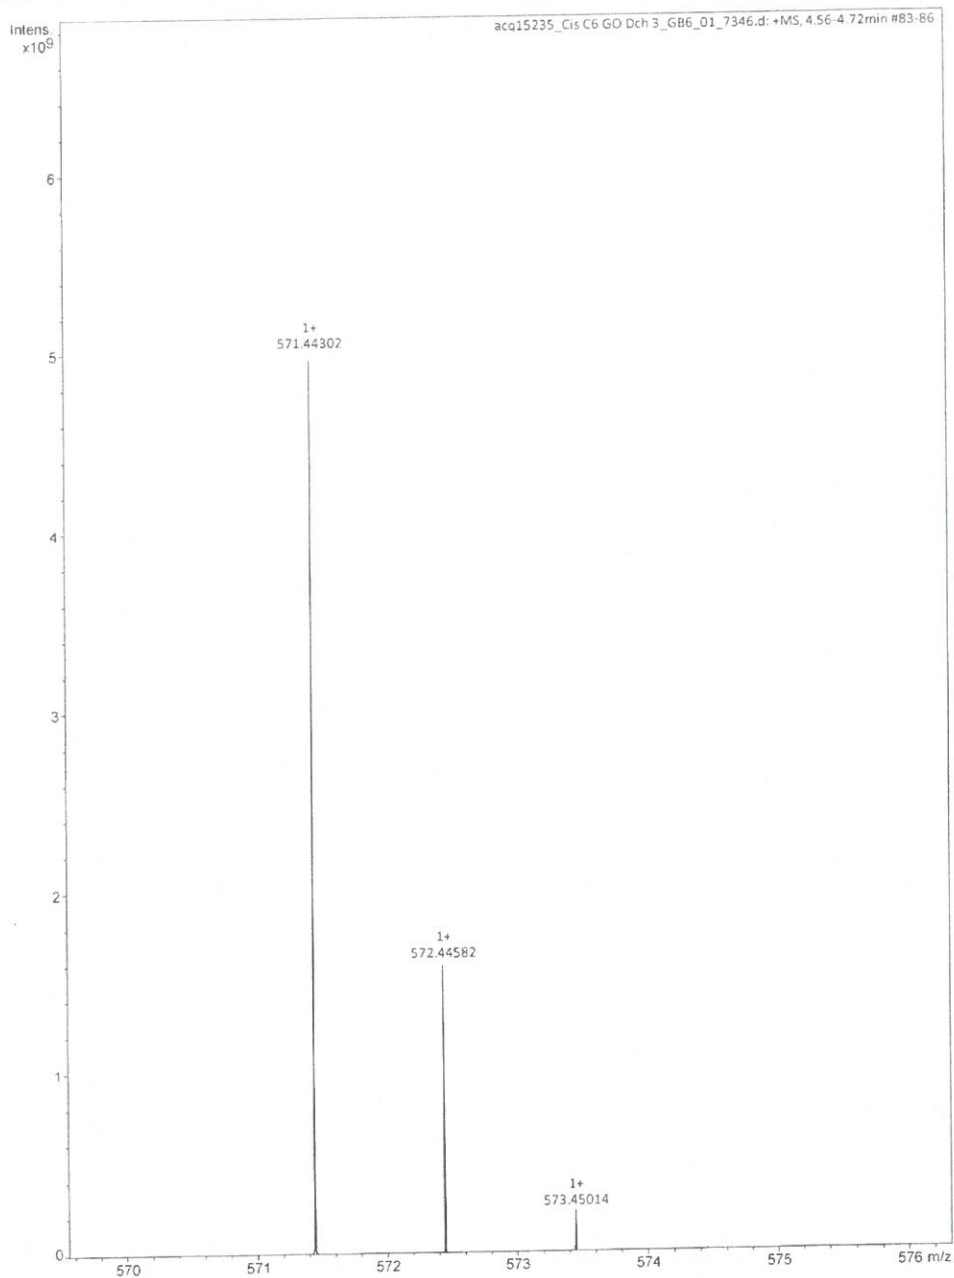

25

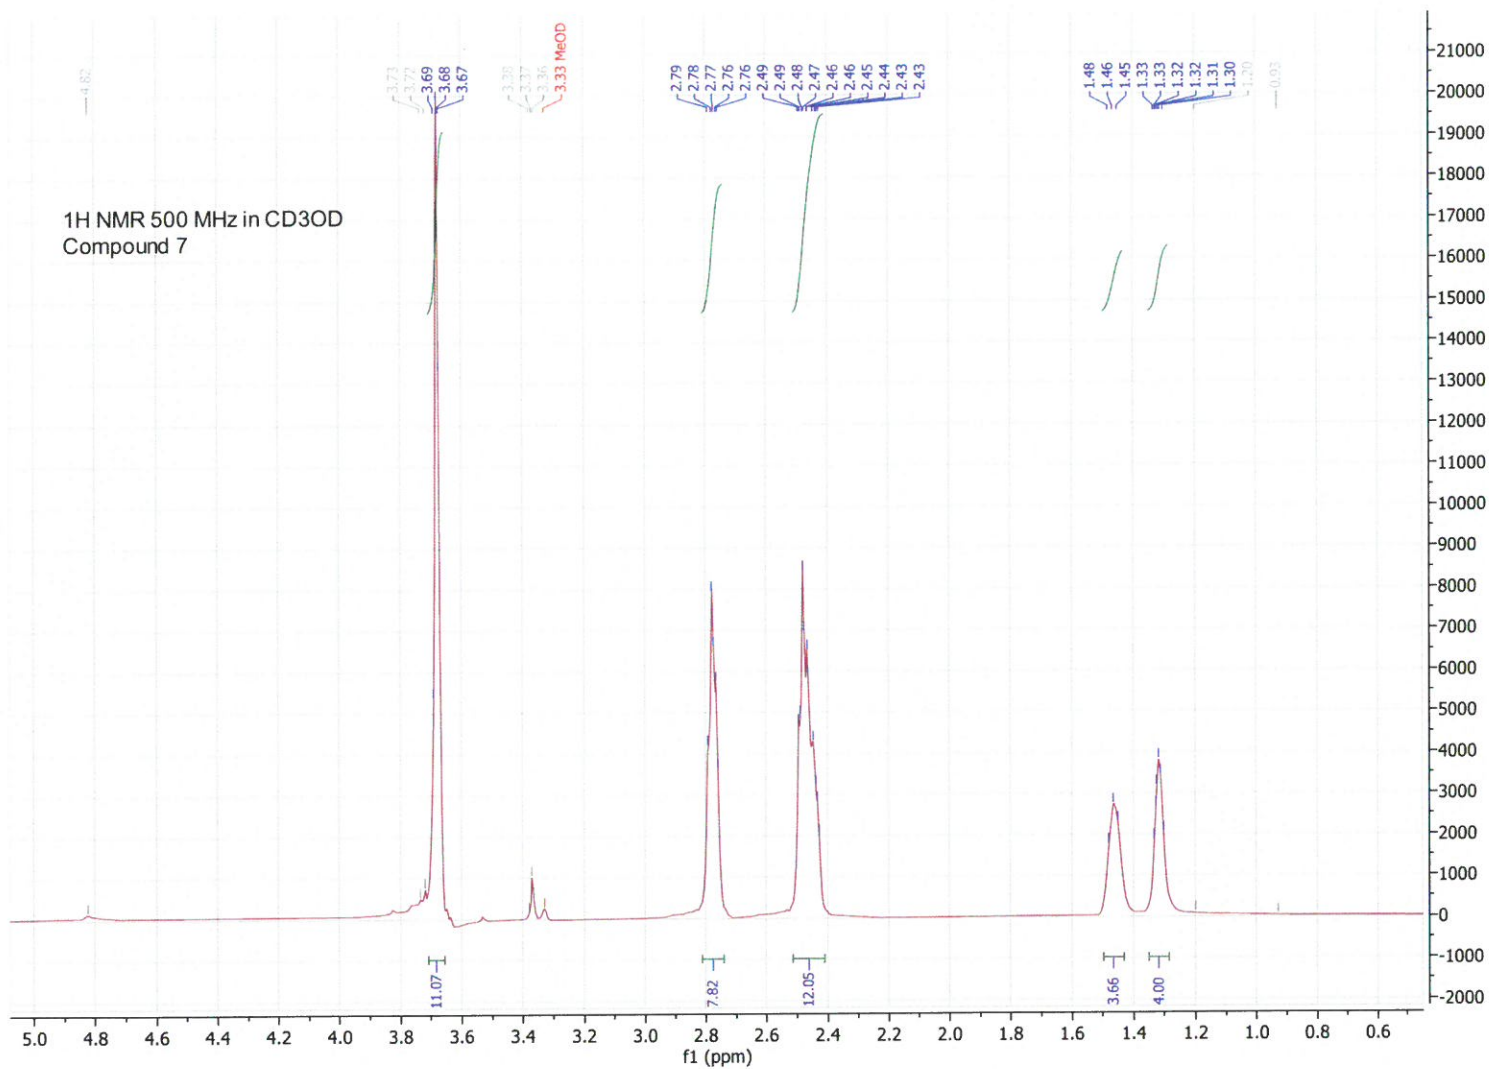

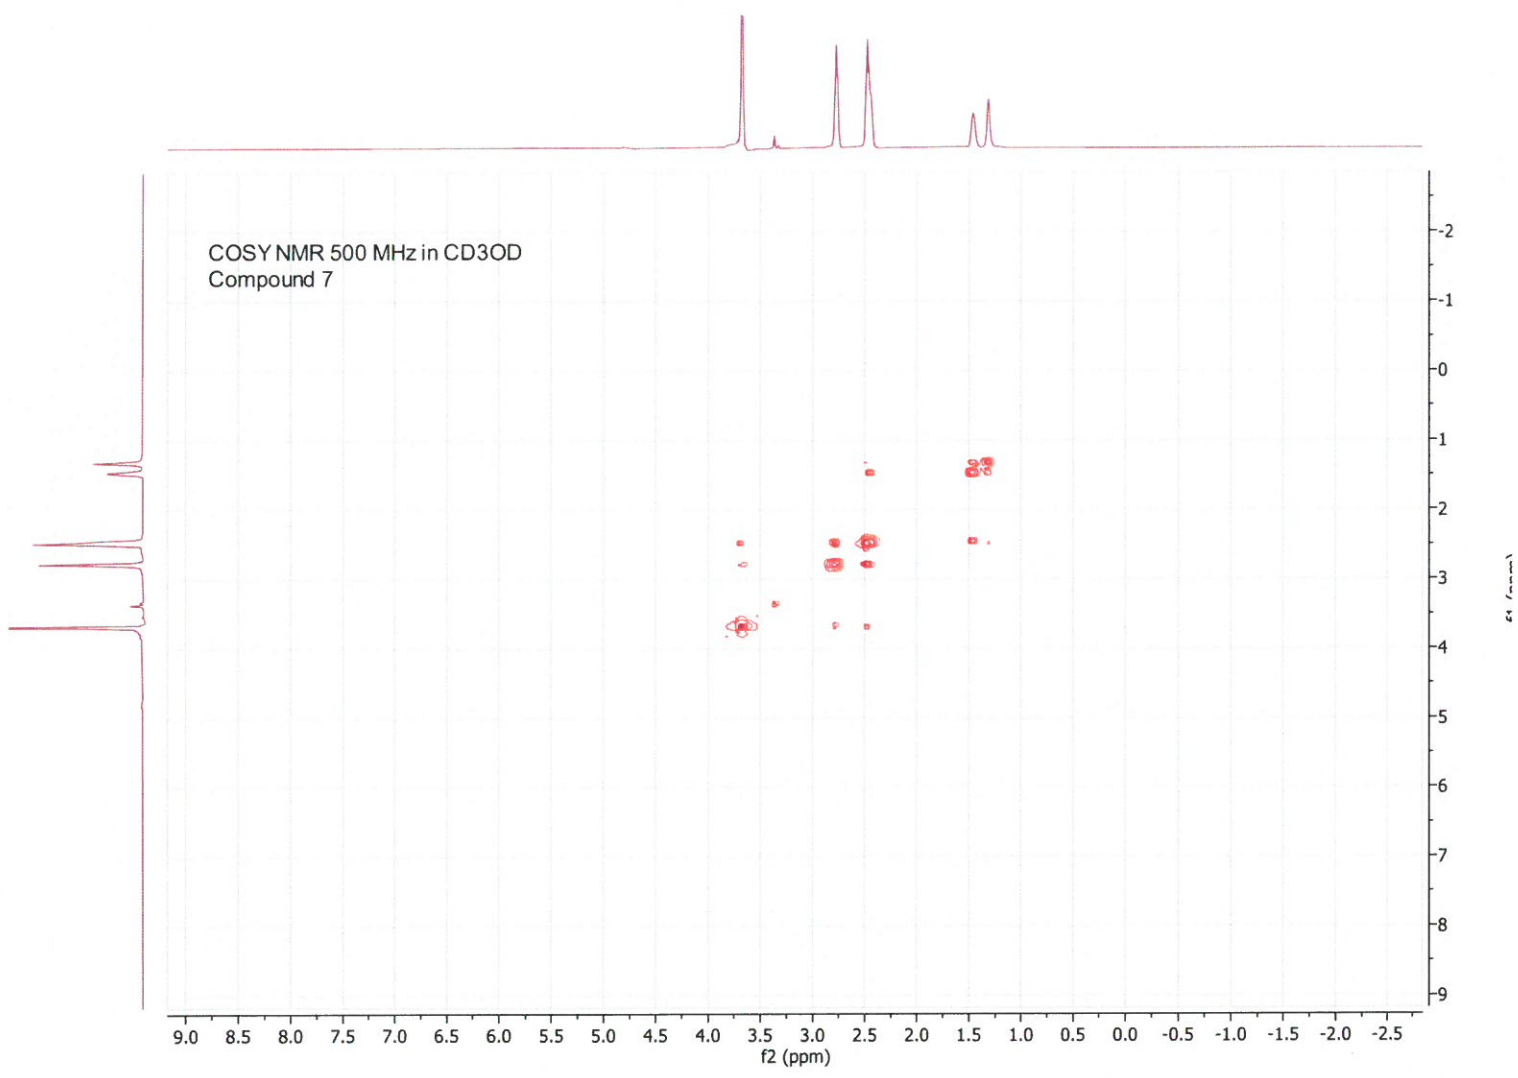

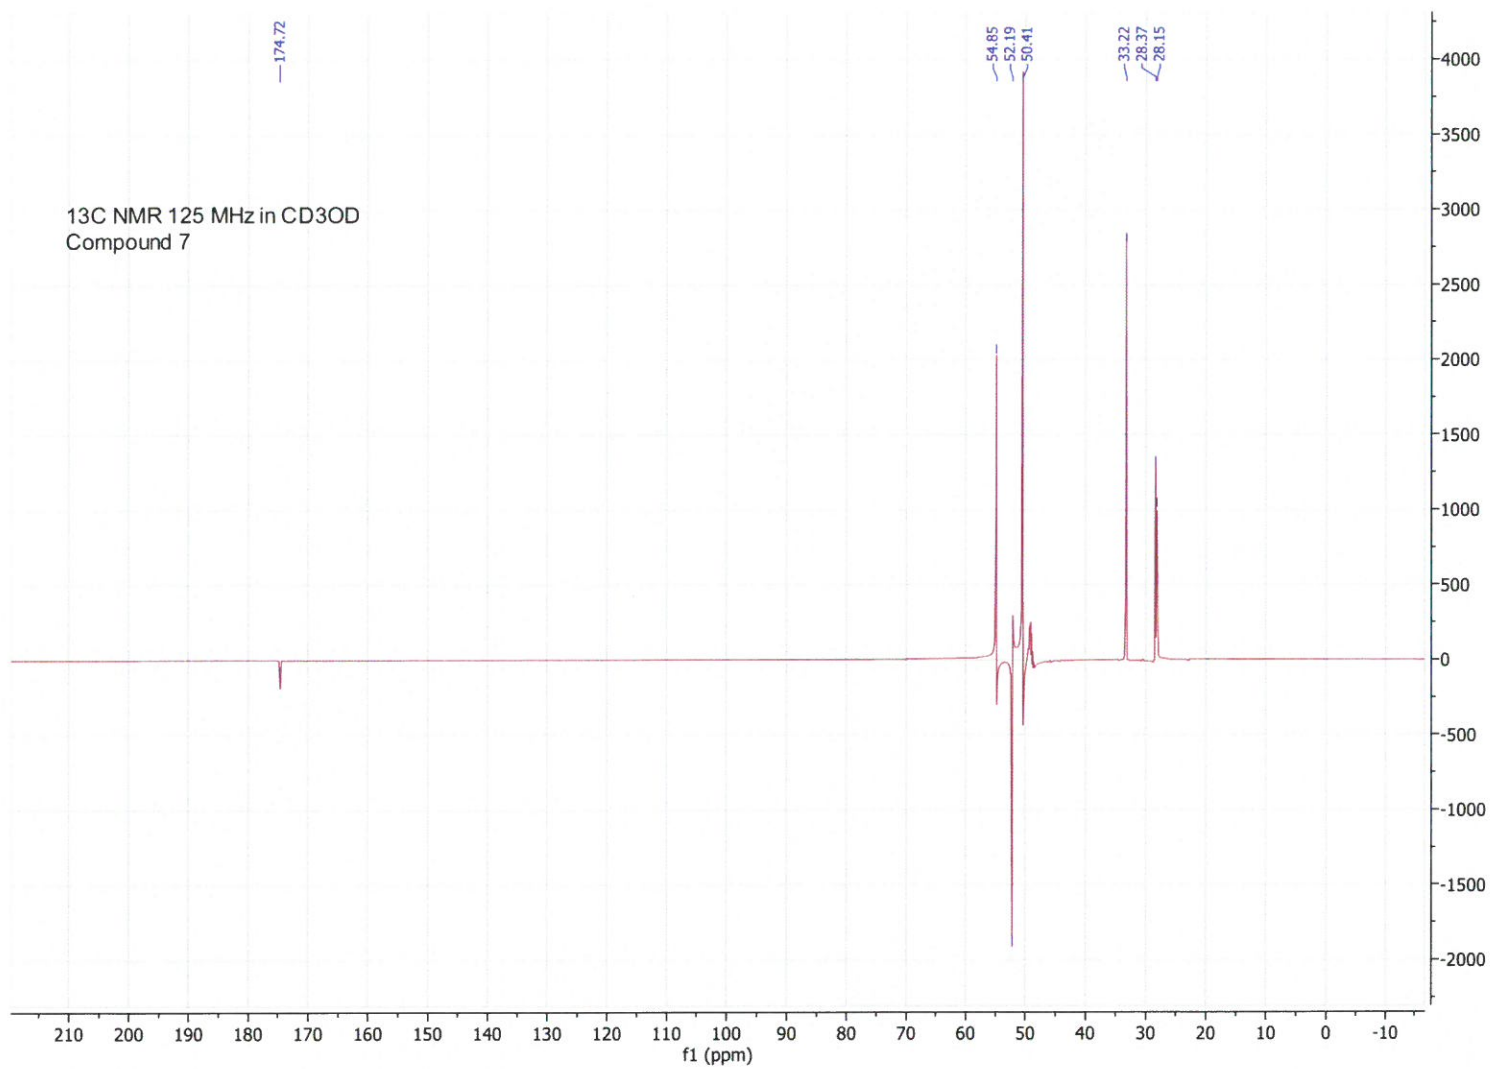

Compound 7

Window Display Report

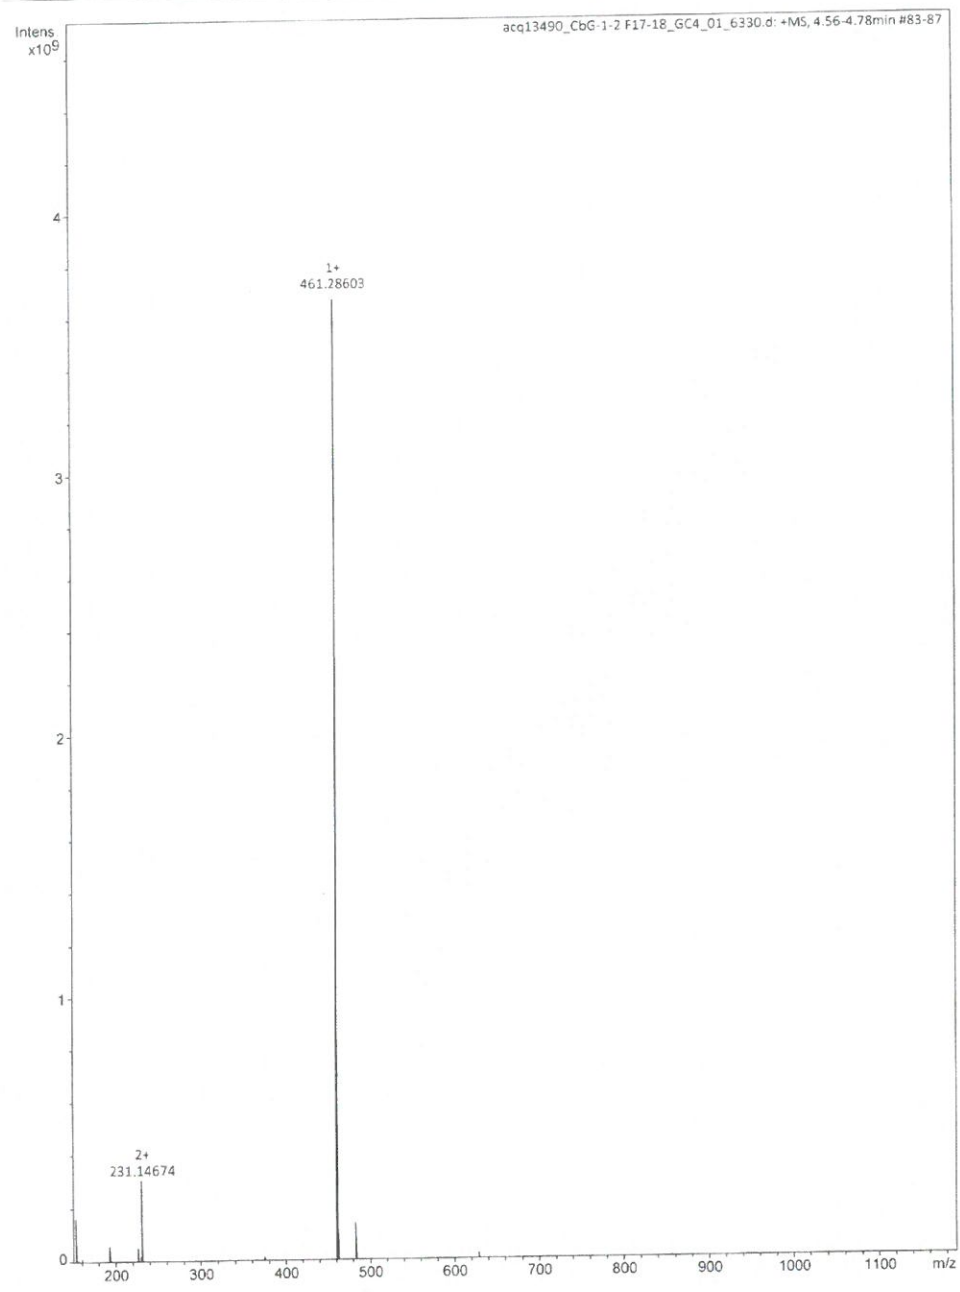

29

1H NMR 500 MHz CD3OD  
Compound 8

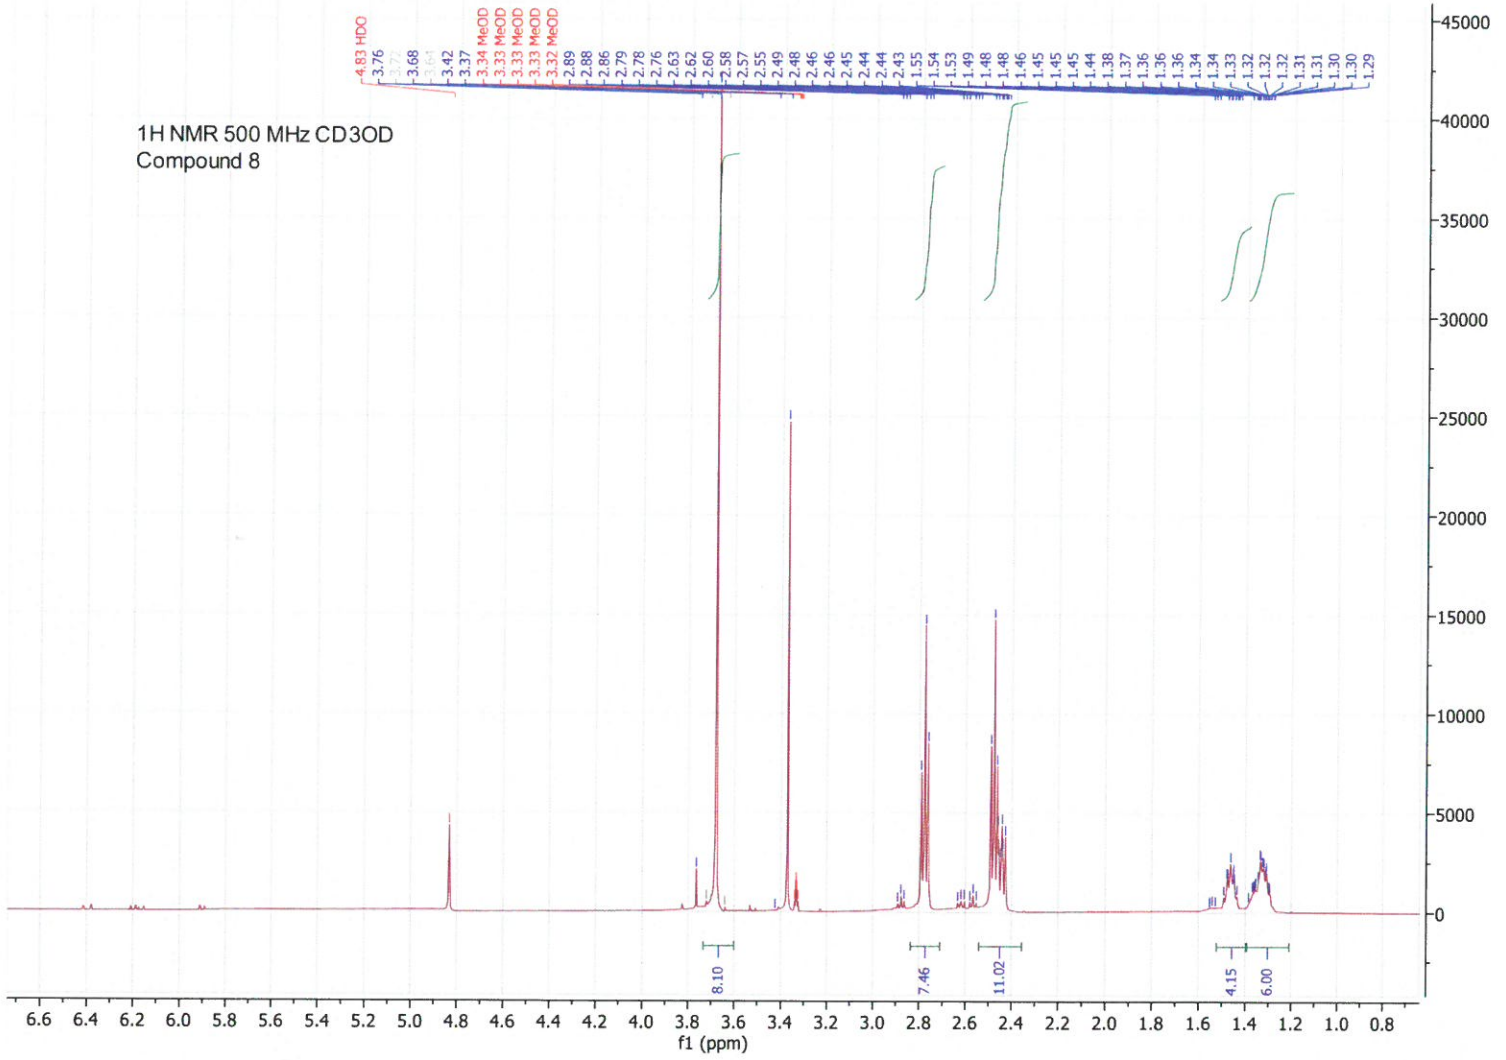

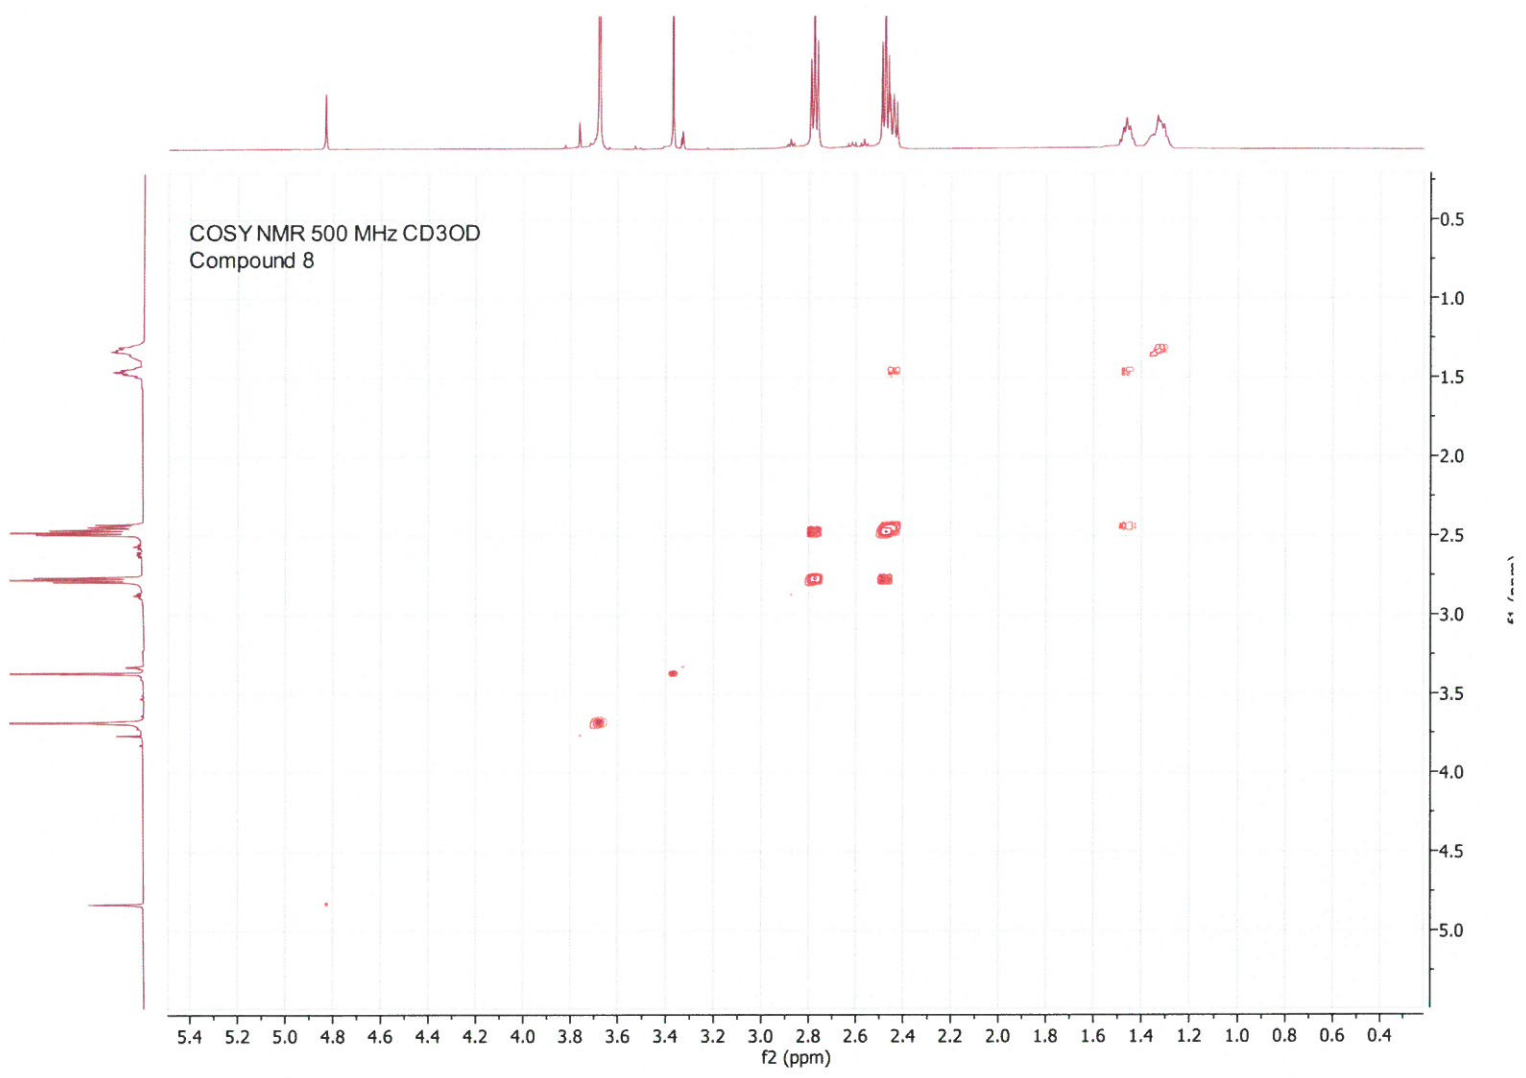

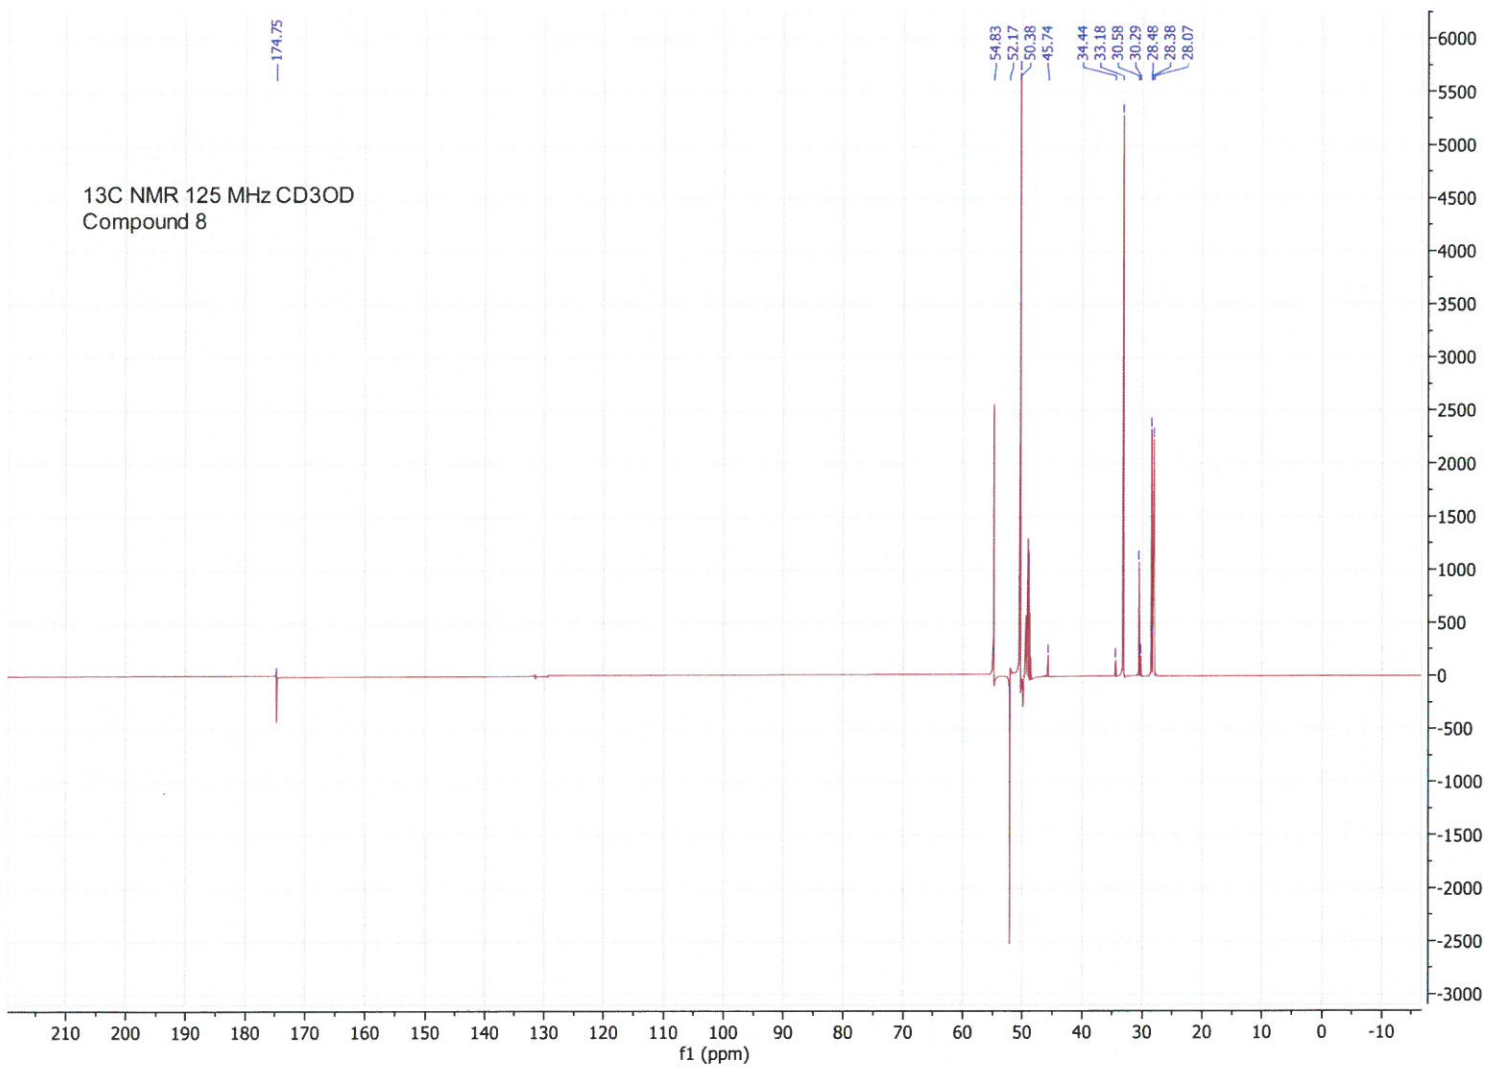



Compound 8

Window Display Report

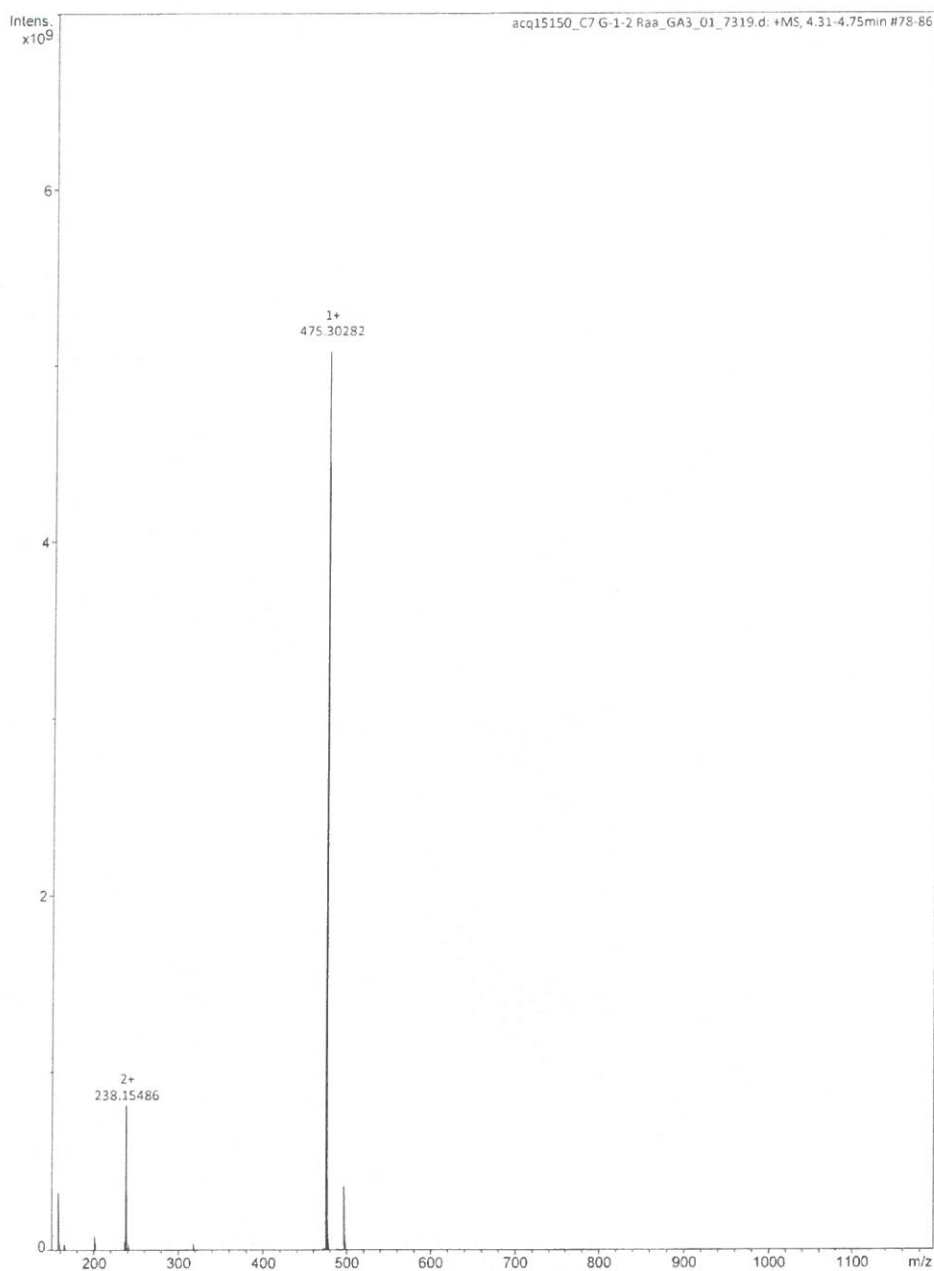

1H NMR 500 MHz in CD3OD  
Compound 9

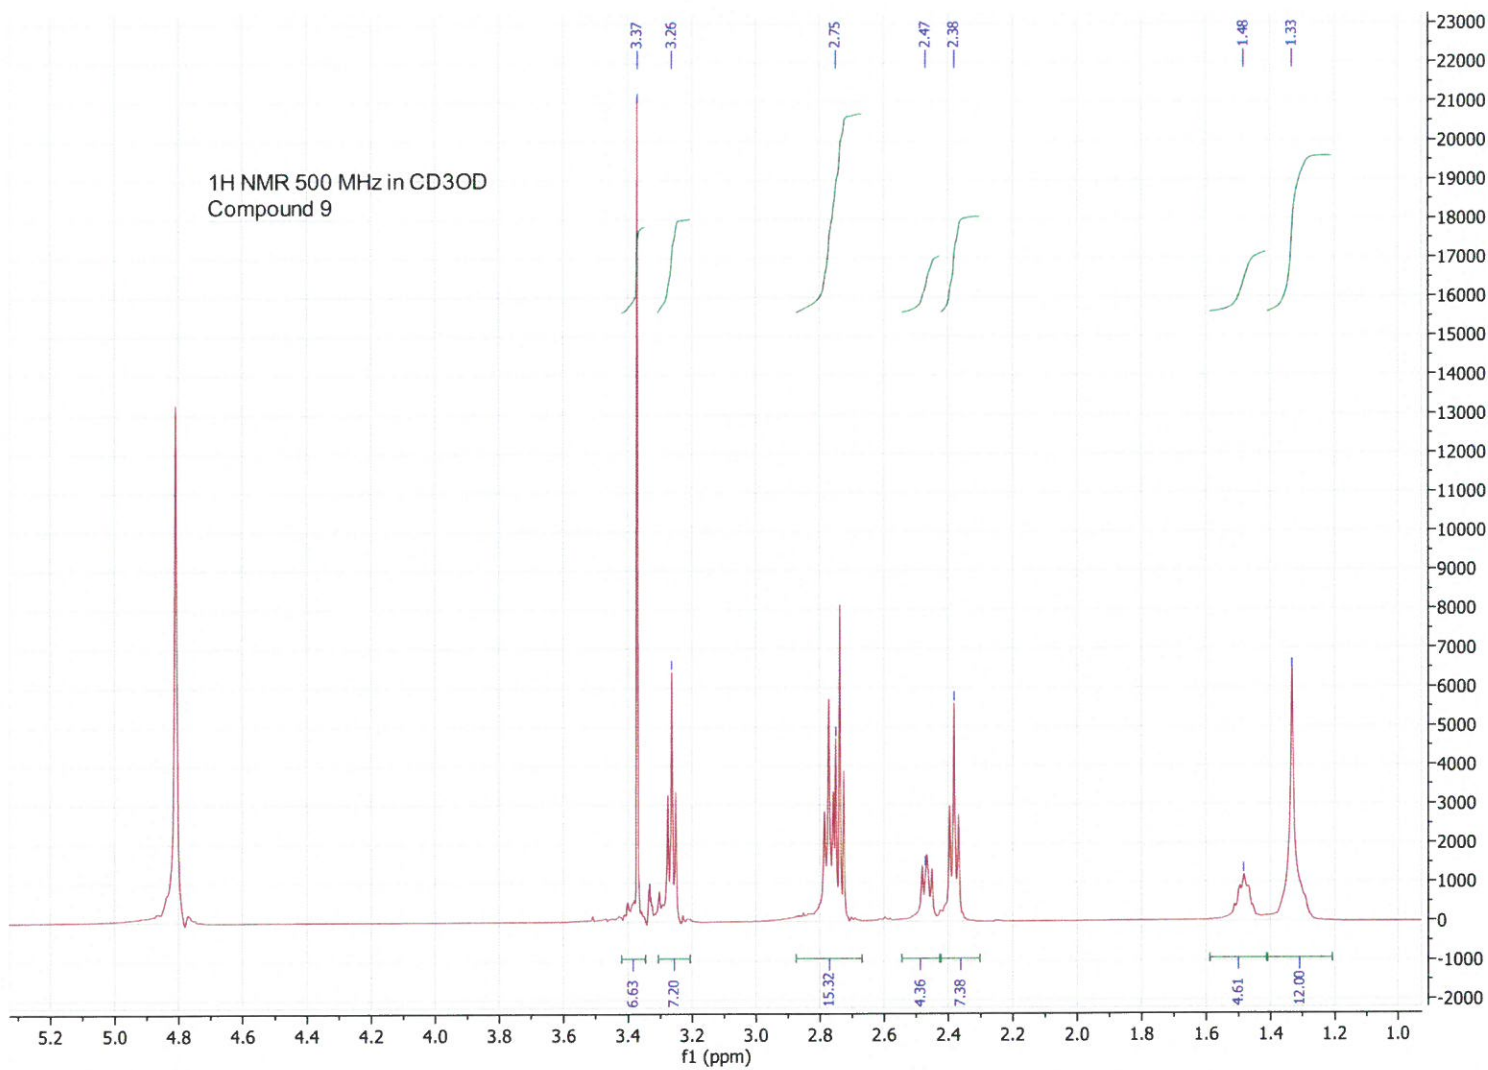

COSY NMR 500 MHz in CD3OD  
Compound 9

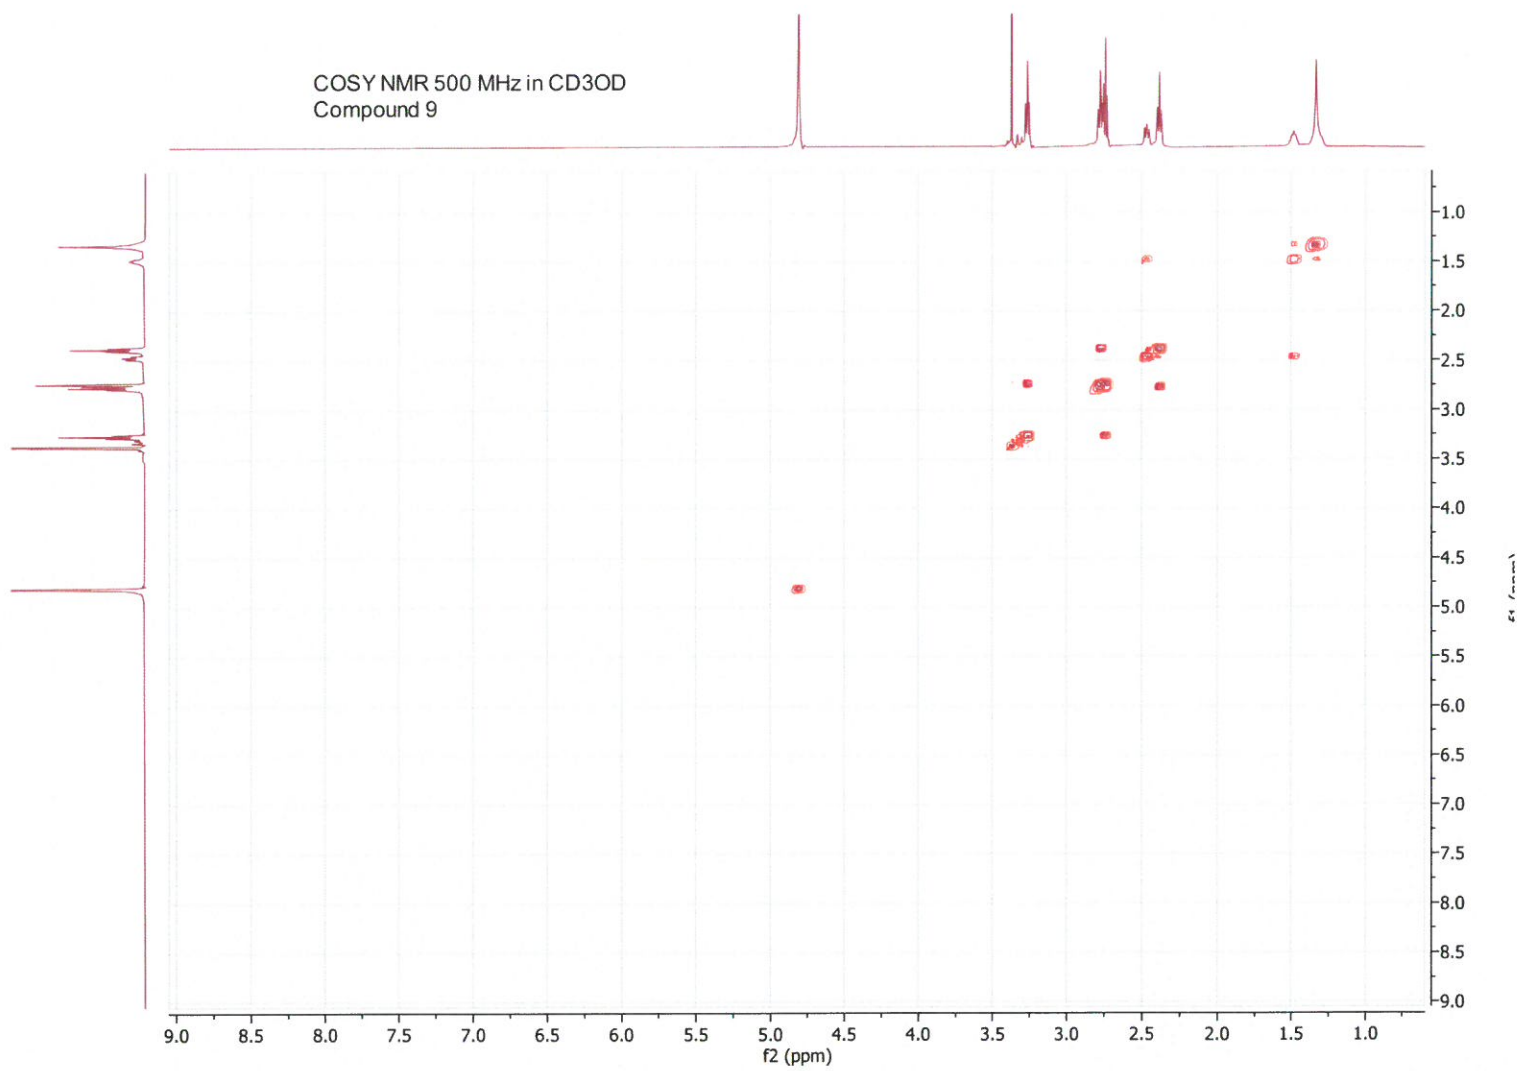

35

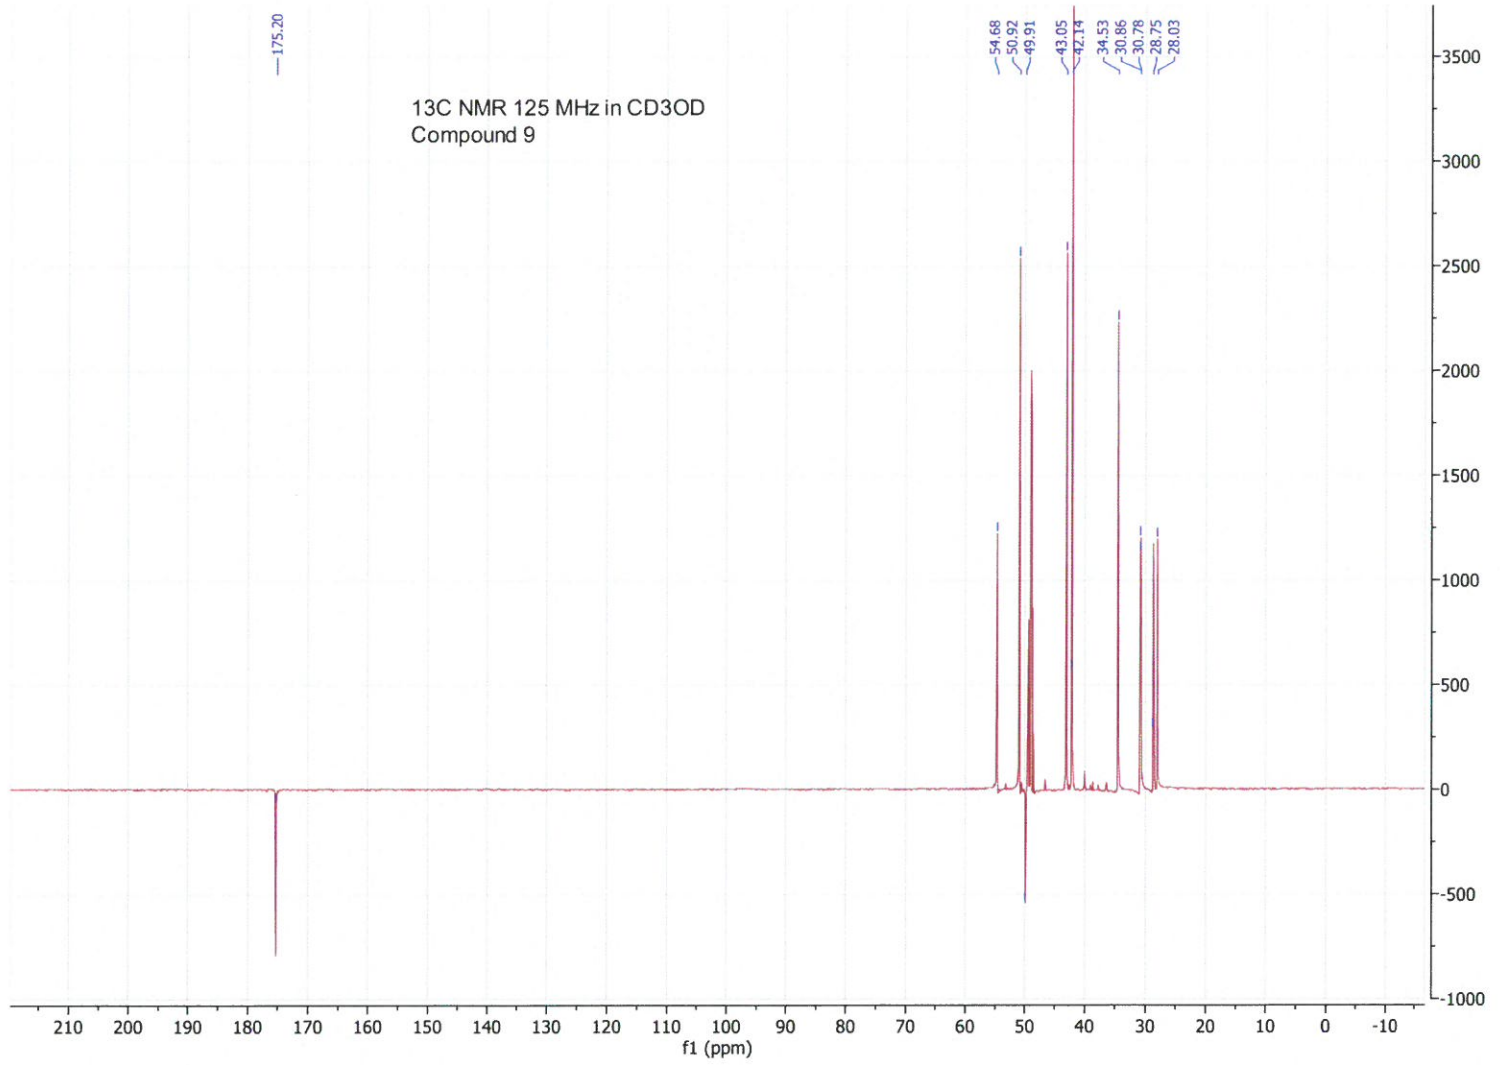

Window Display Report

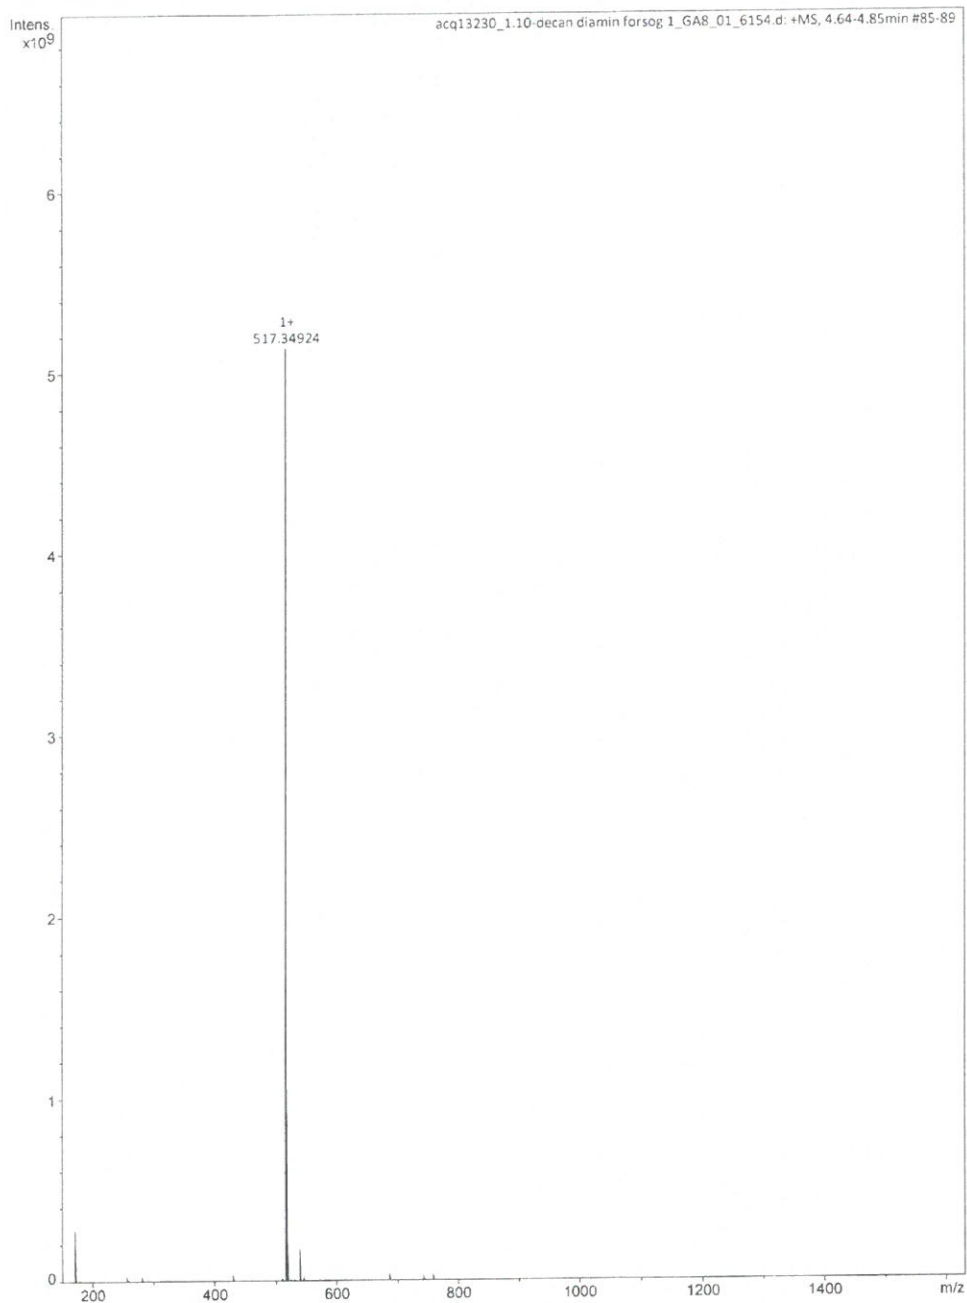

1H NMR 500 MHz CD3OD  
Compound 10

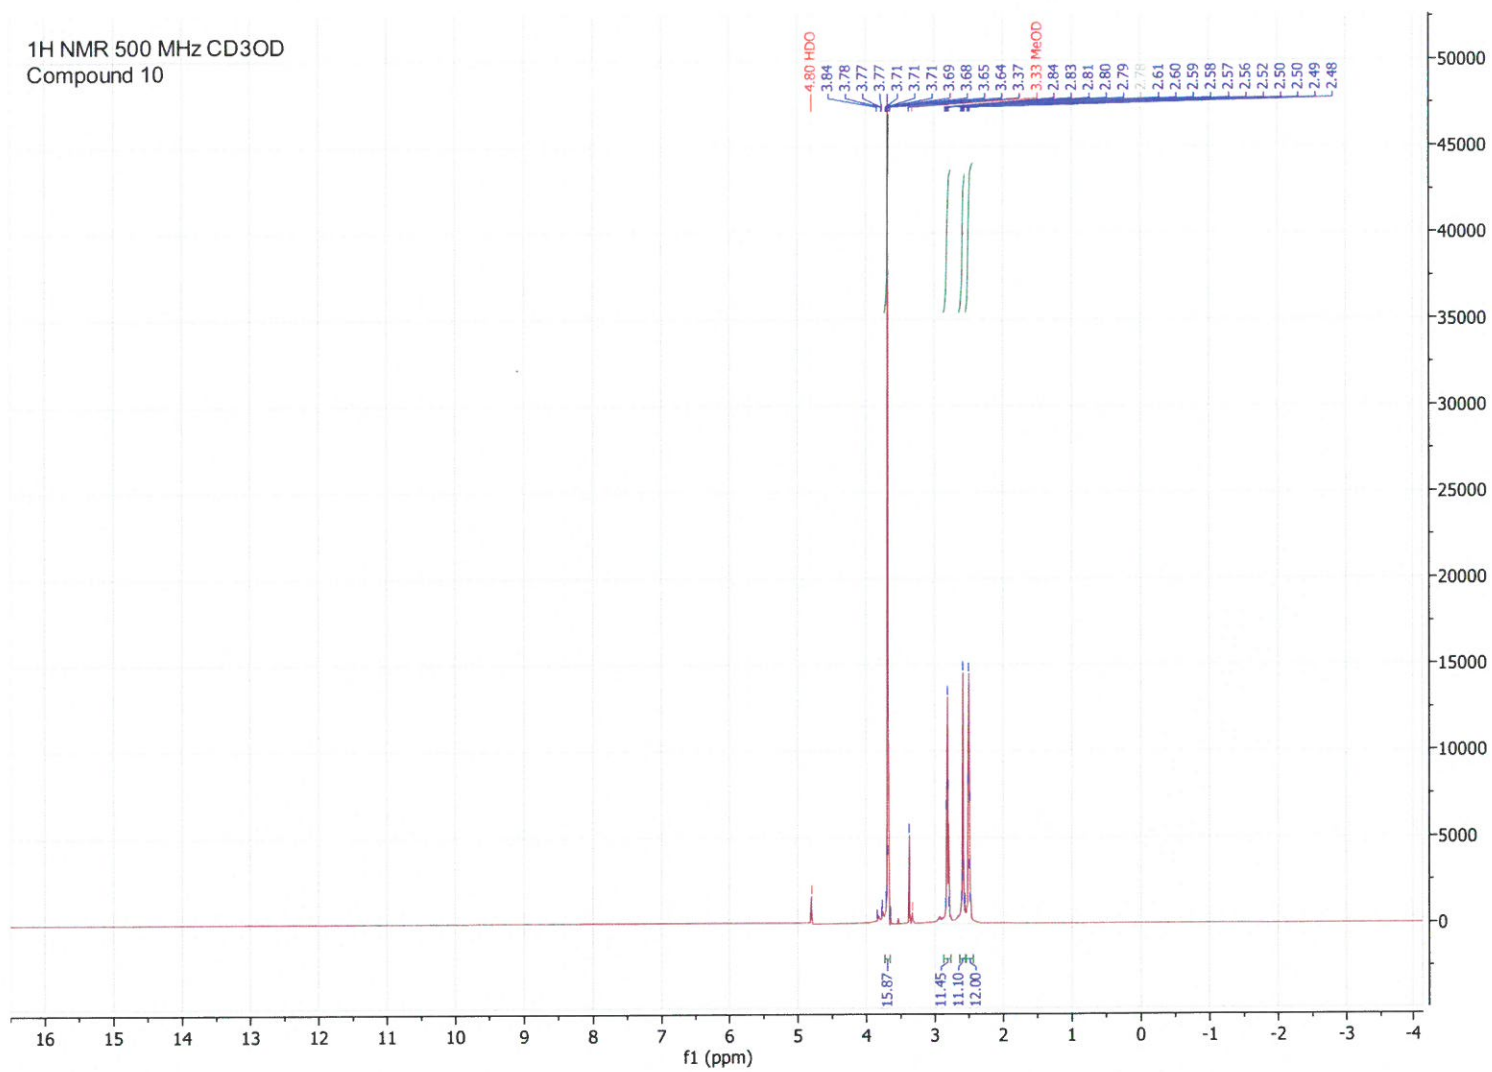

COSY NMR 500 MHz CD3OD  
Compound 10

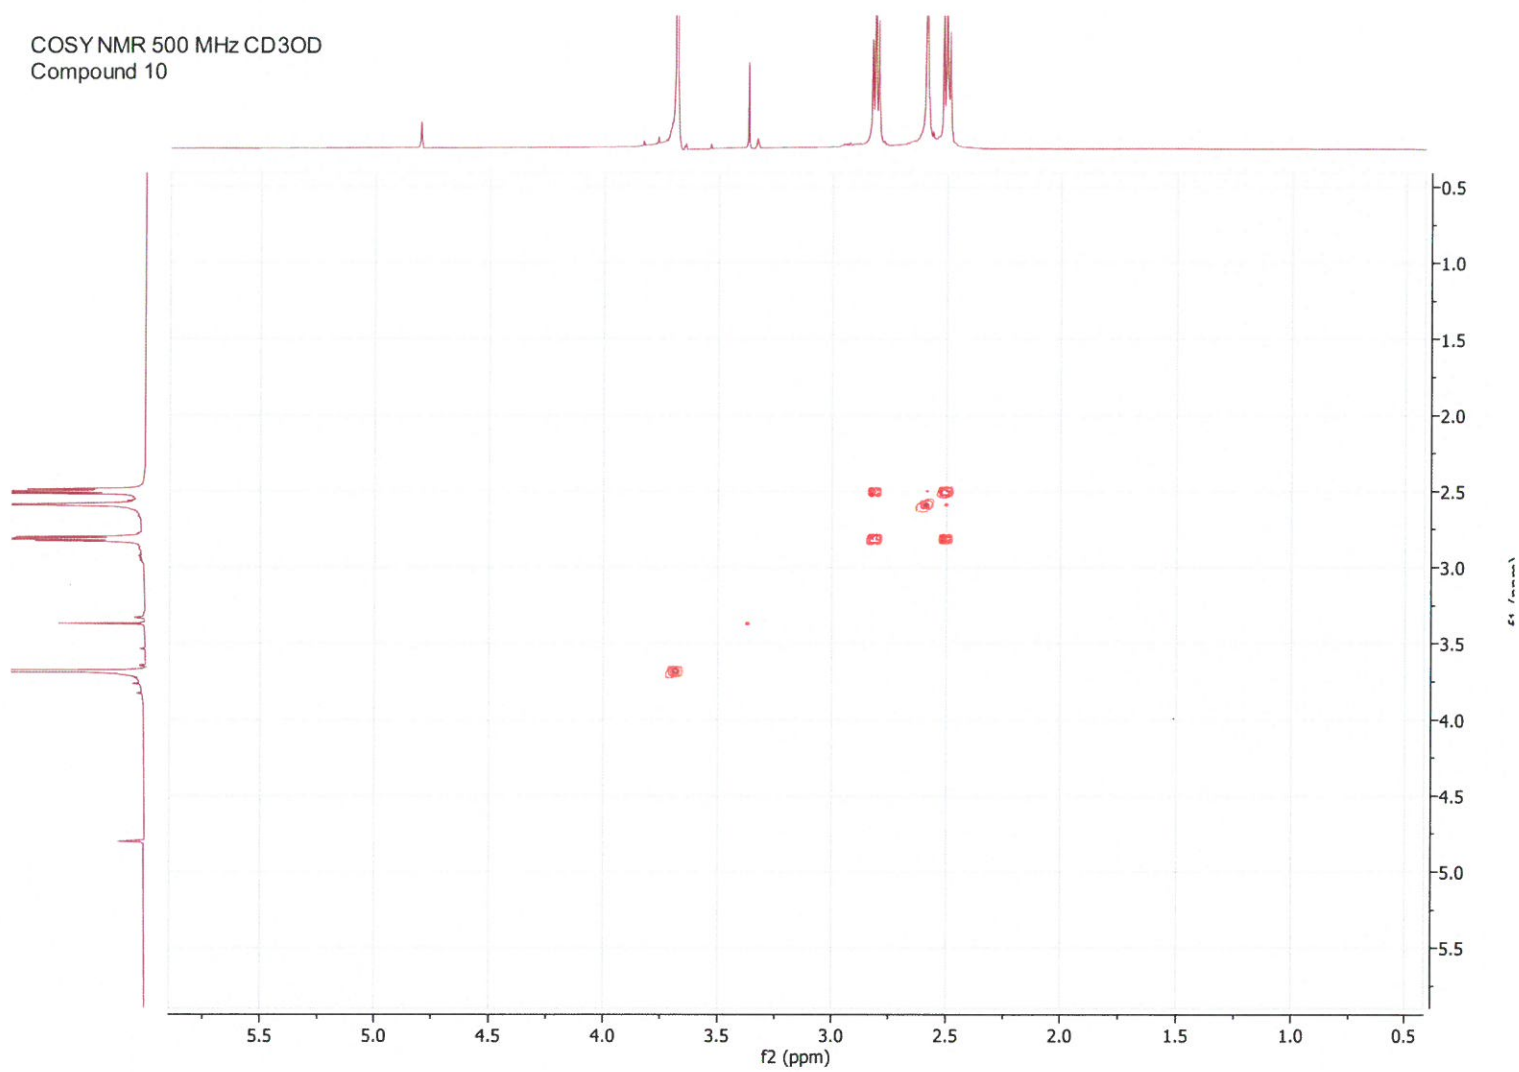

<sup>13</sup>C NMR 125 MHz CD<sub>3</sub>OD  
Compound 10

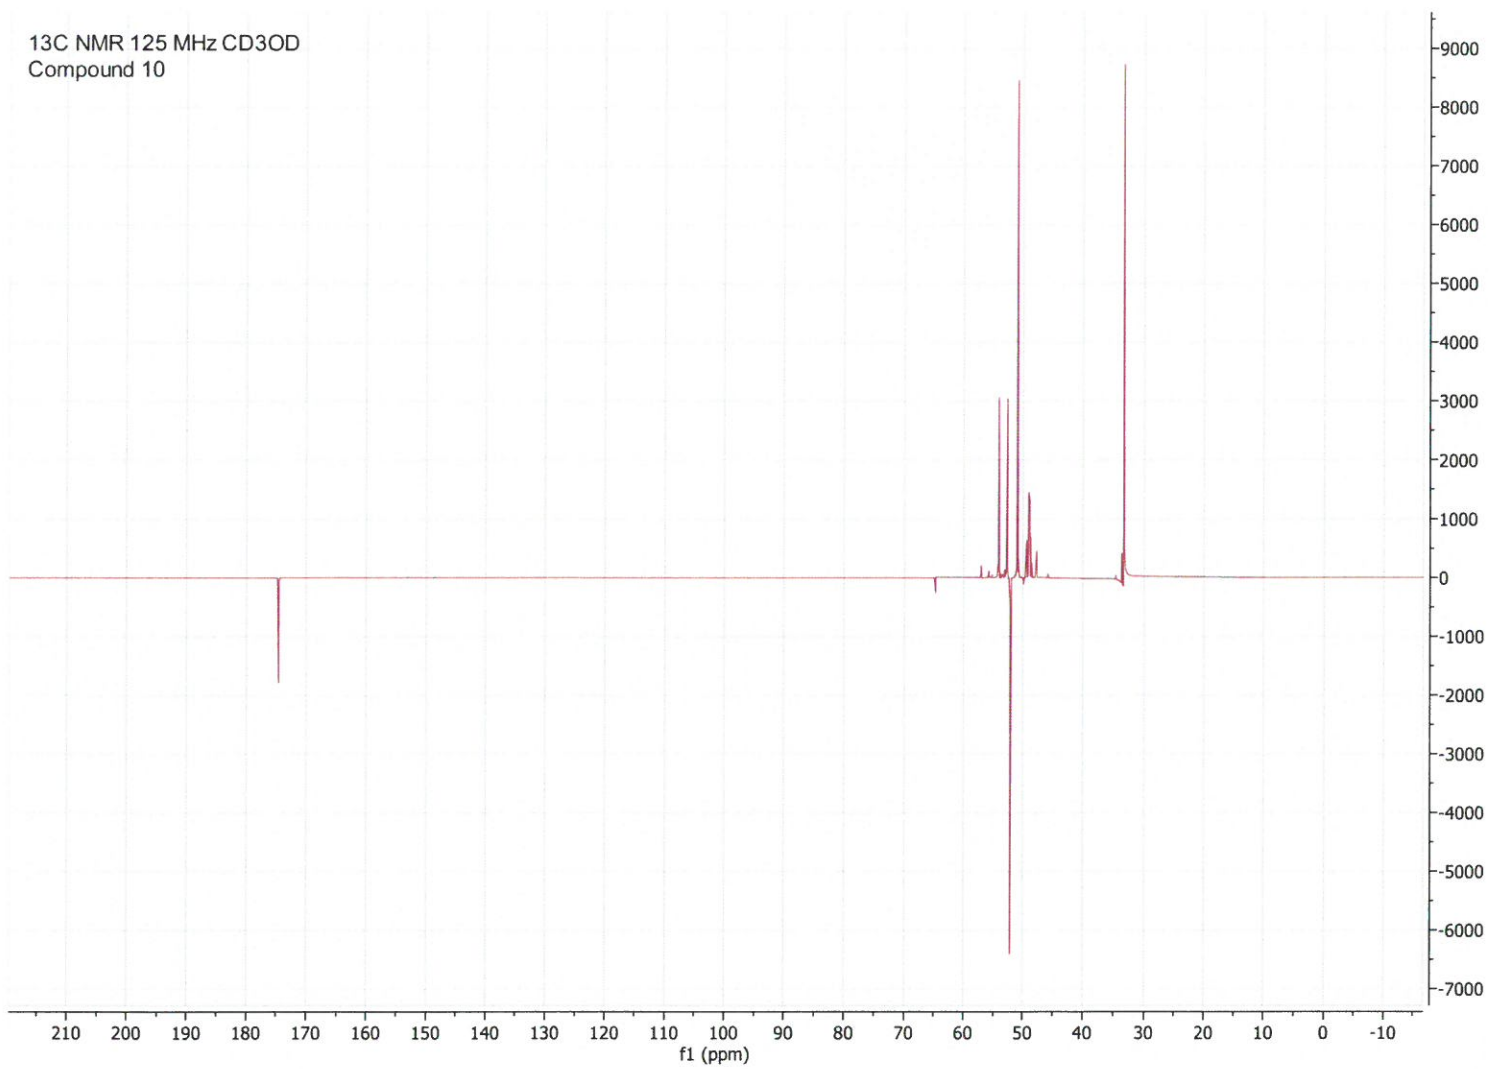

40



Compound 10

Window Display Report

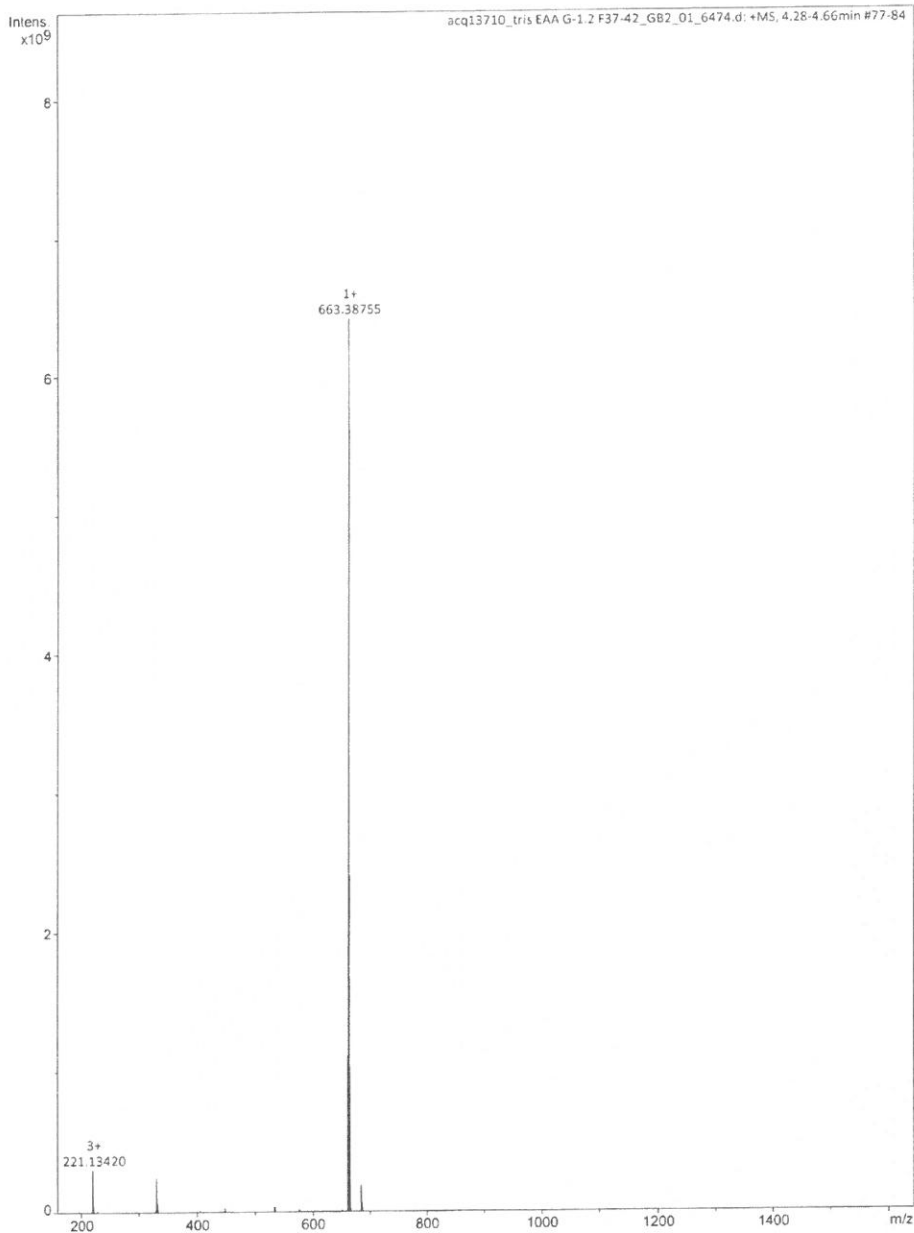

91

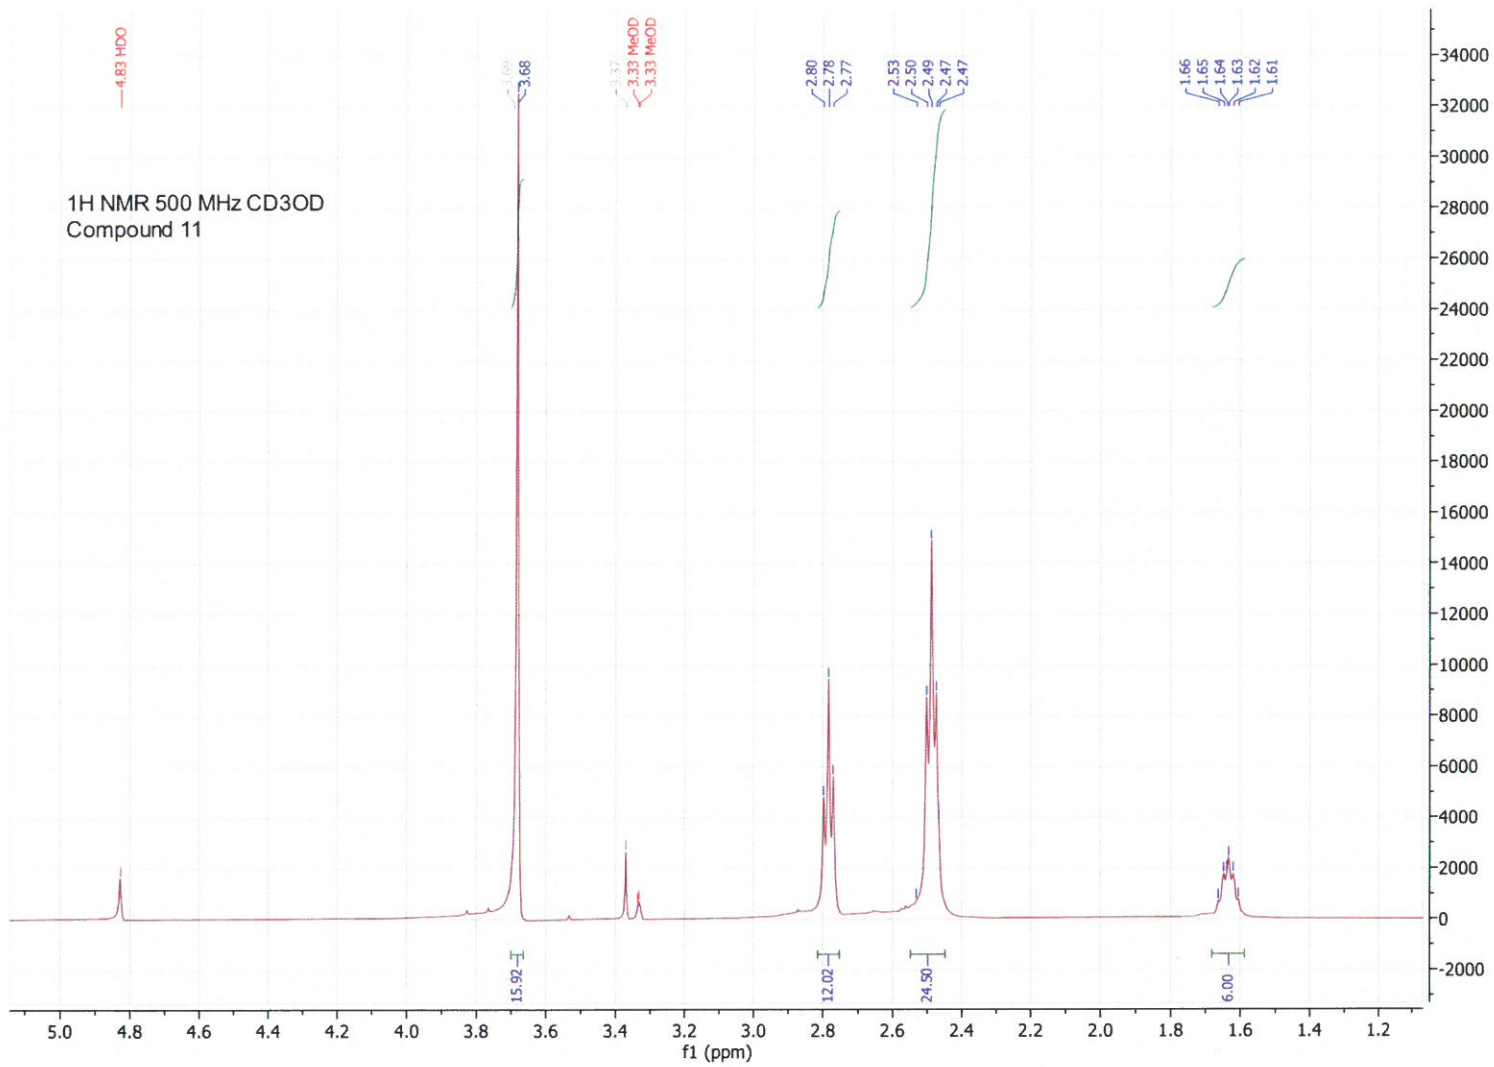

COSY NMR 500 MHz CD3OD  
Compound 11

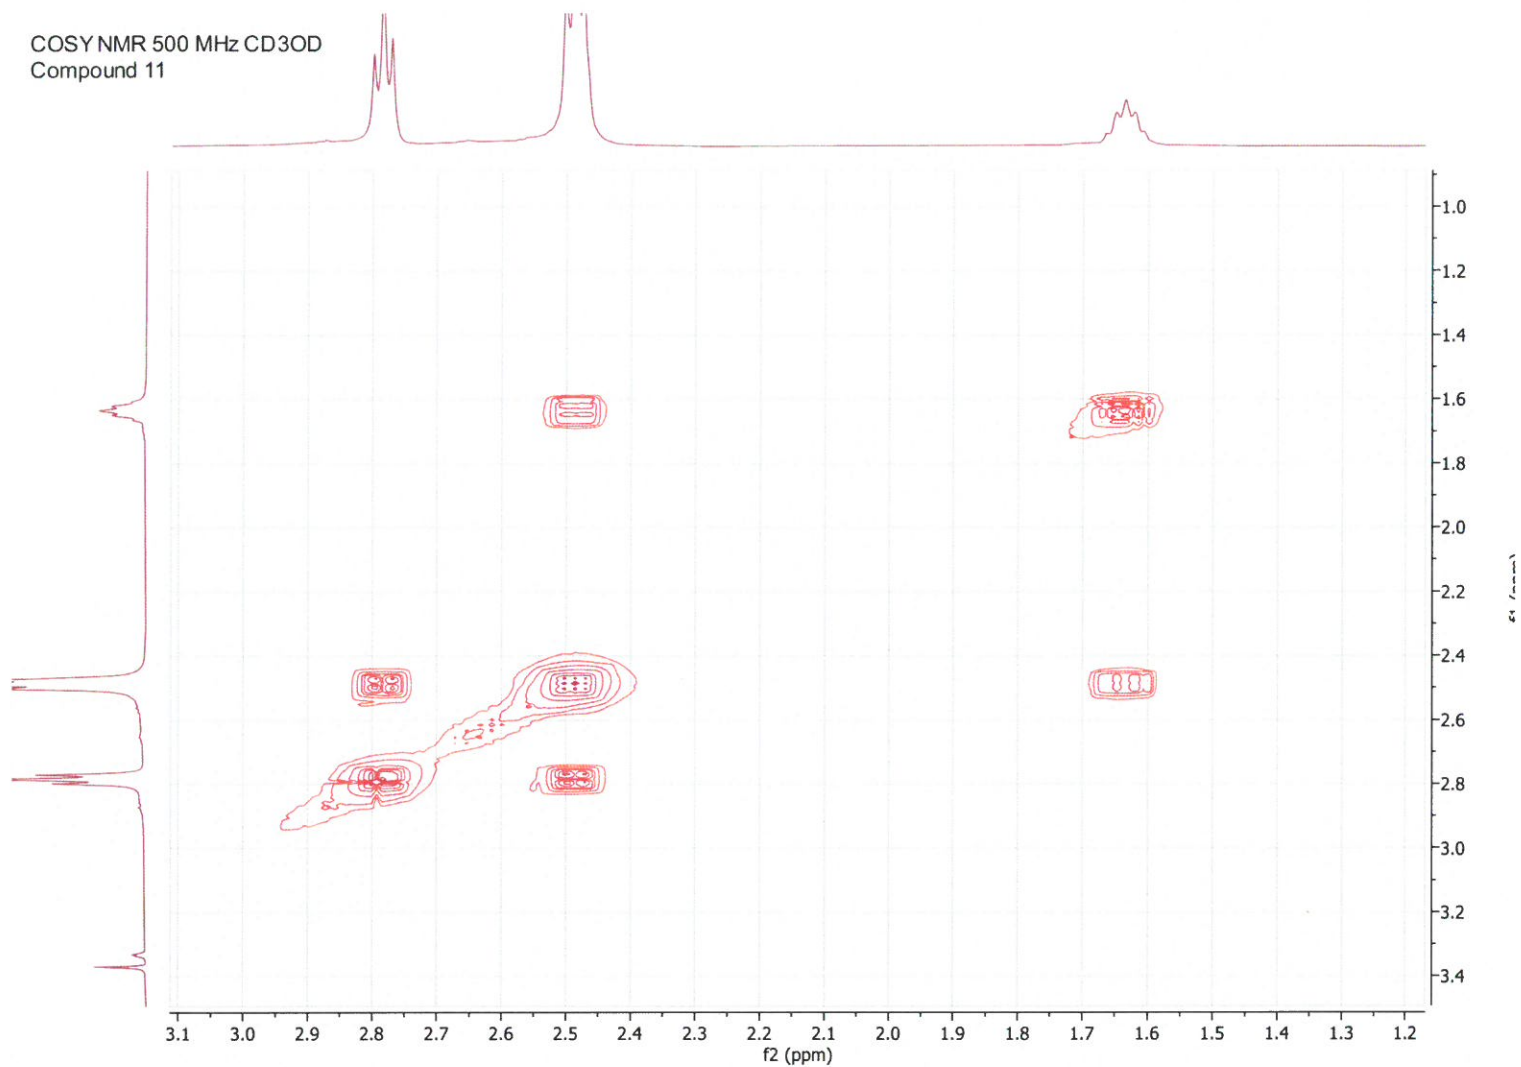

43

<sup>13</sup>C NMR 125 MHz CD<sub>3</sub>OD  
Compound 11

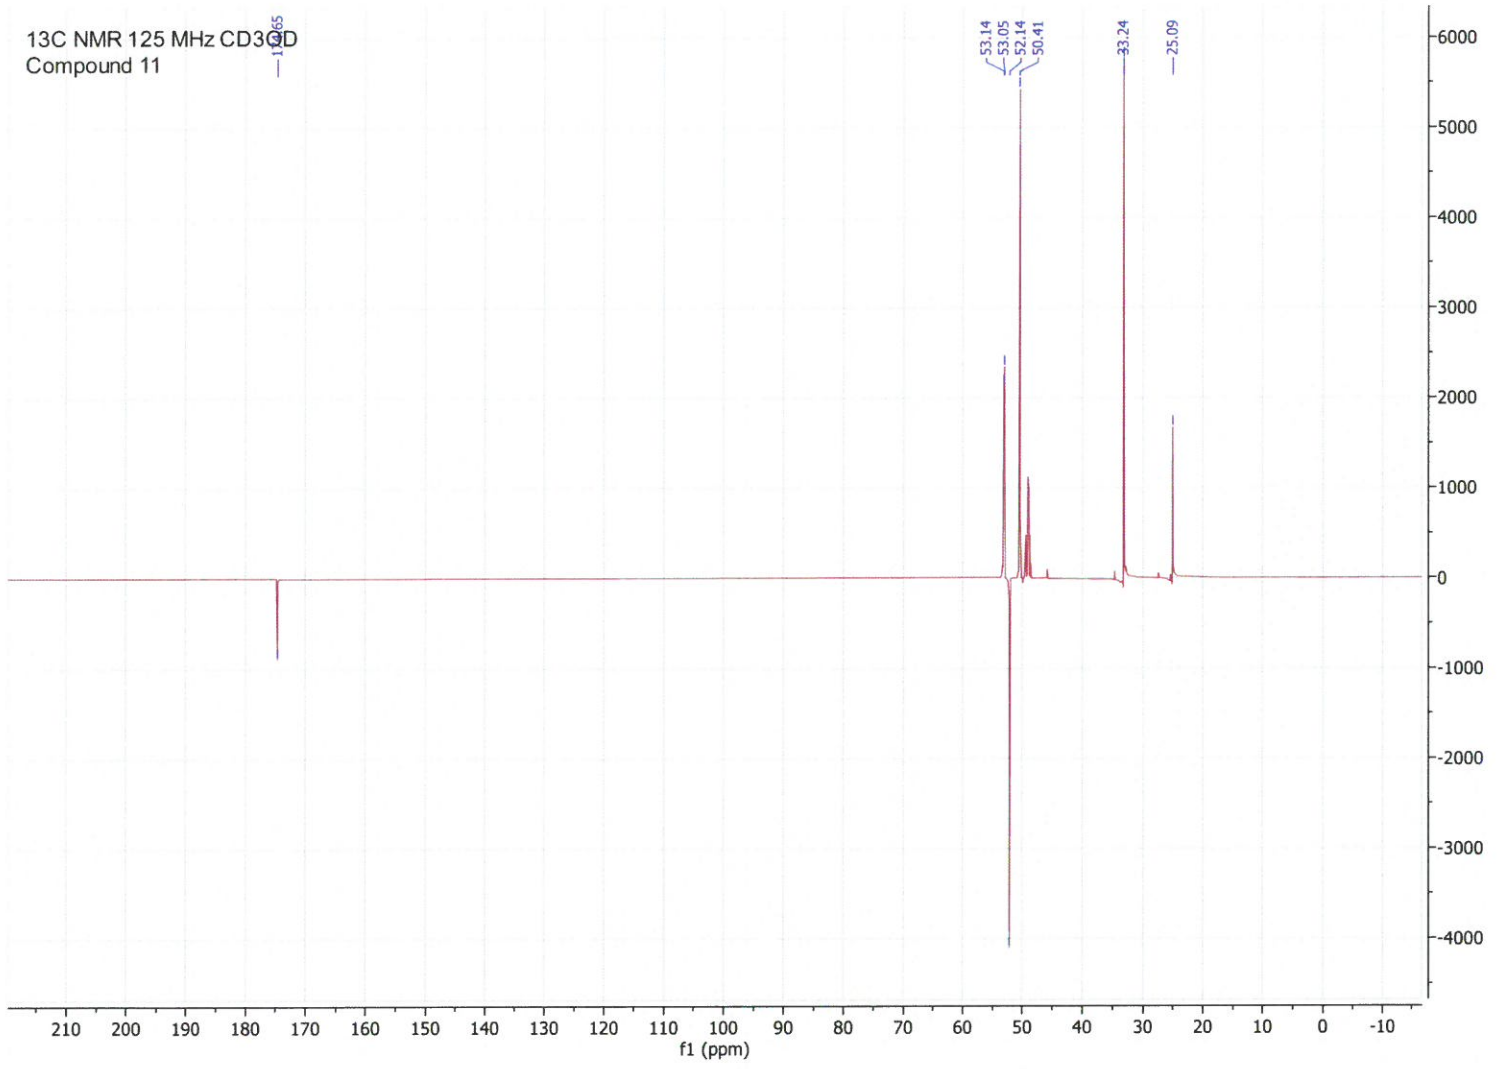

94

Compound 11

Window Display Report

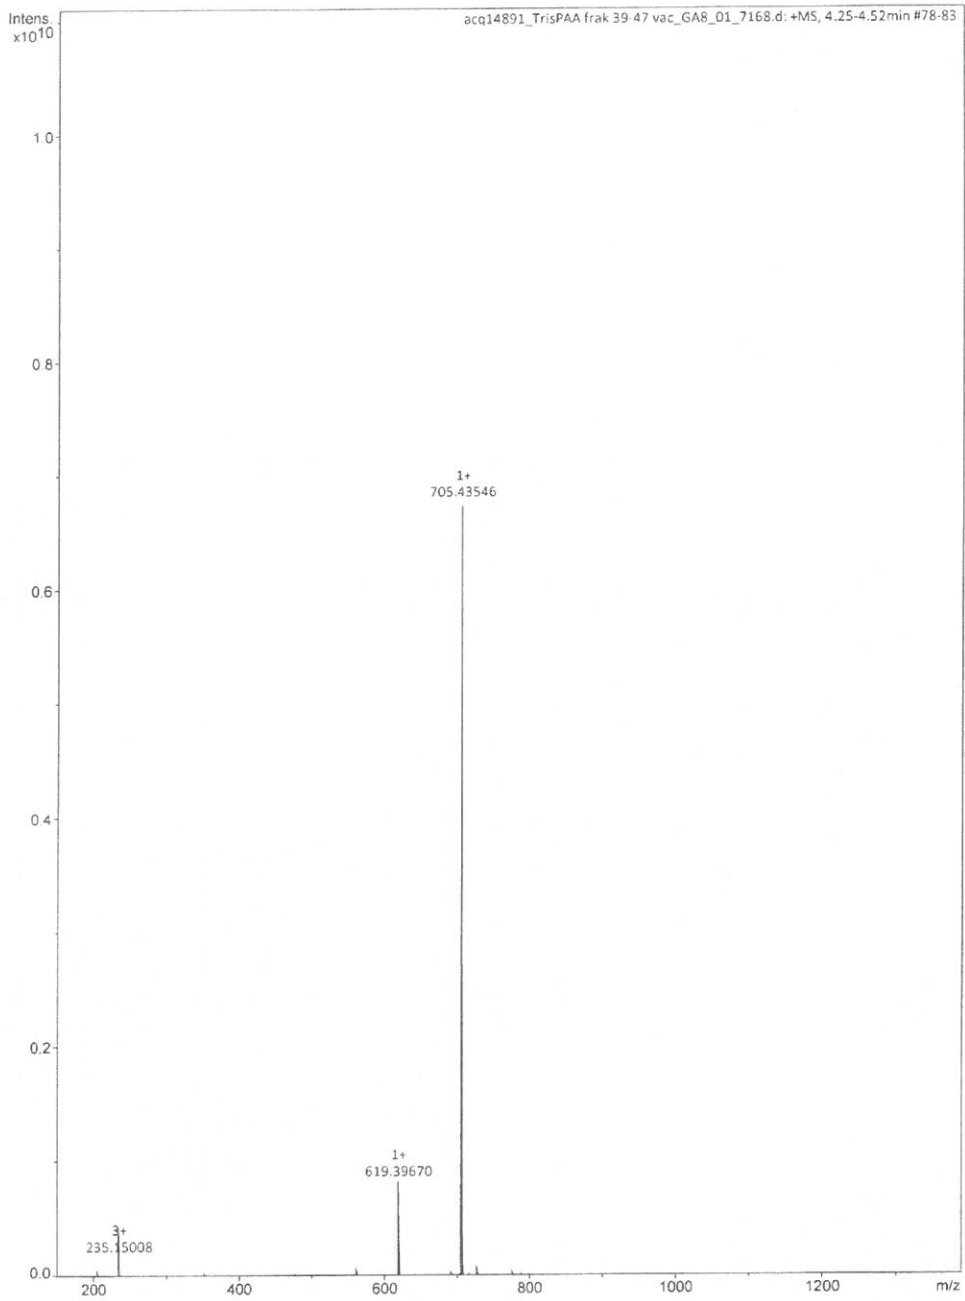

45

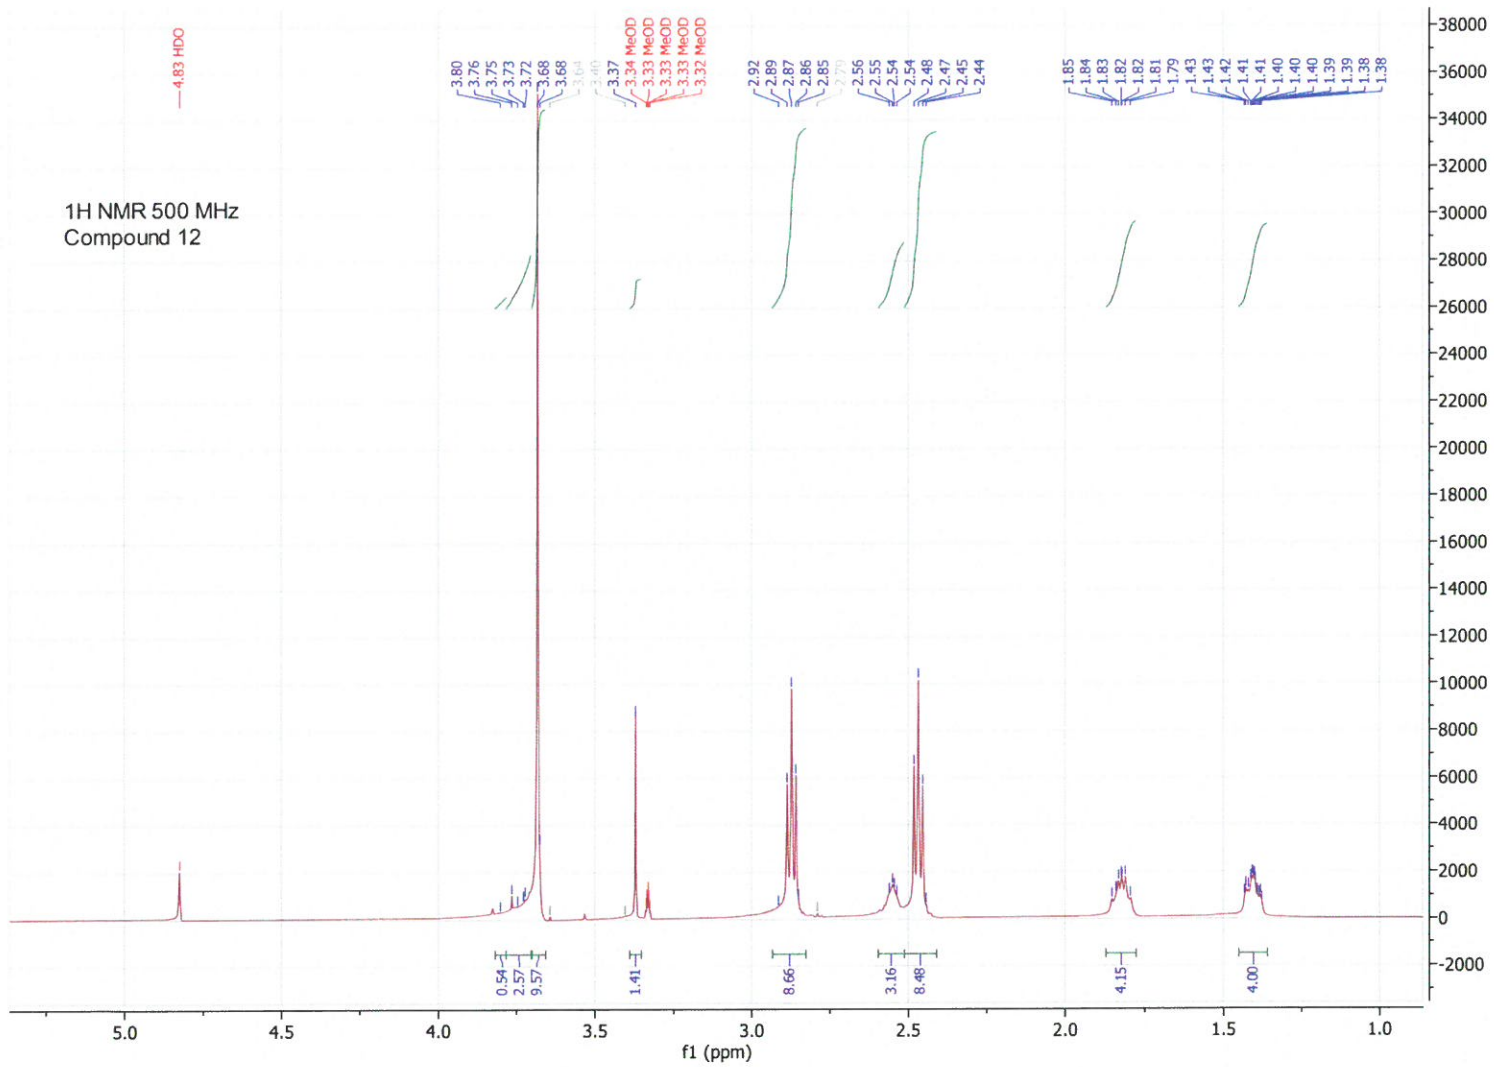

COSY NMR 500 MHz  
Compound 12

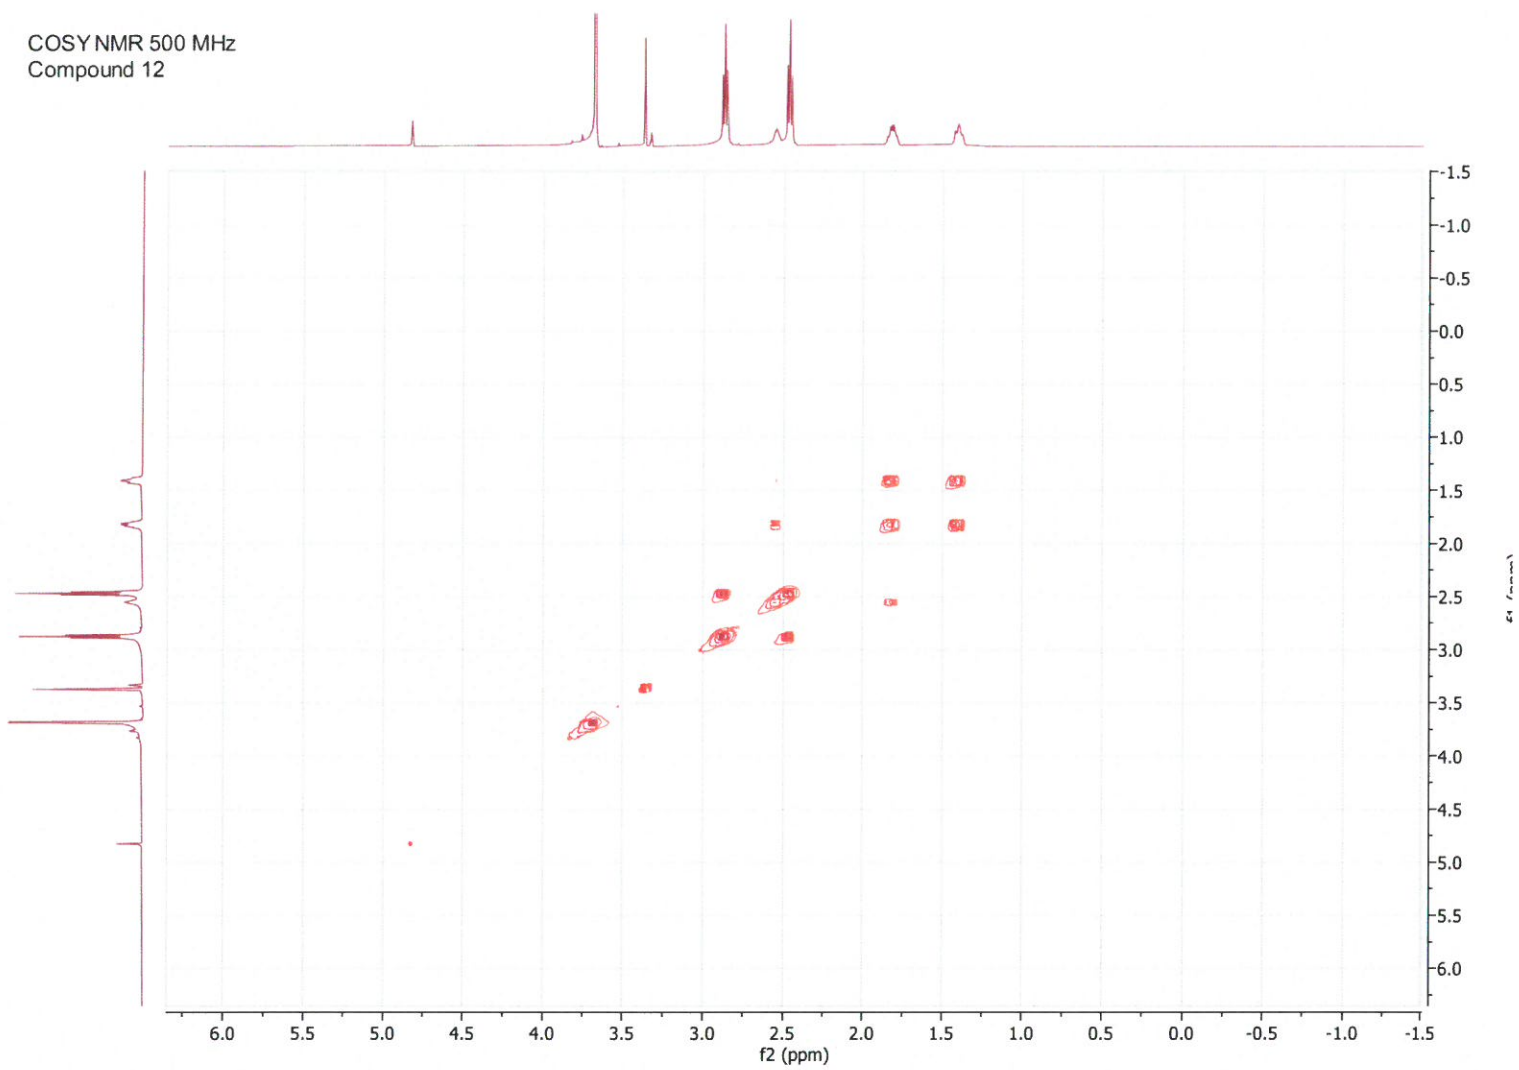

<sup>13</sup>C NMR 125 MHz  
Compound 12

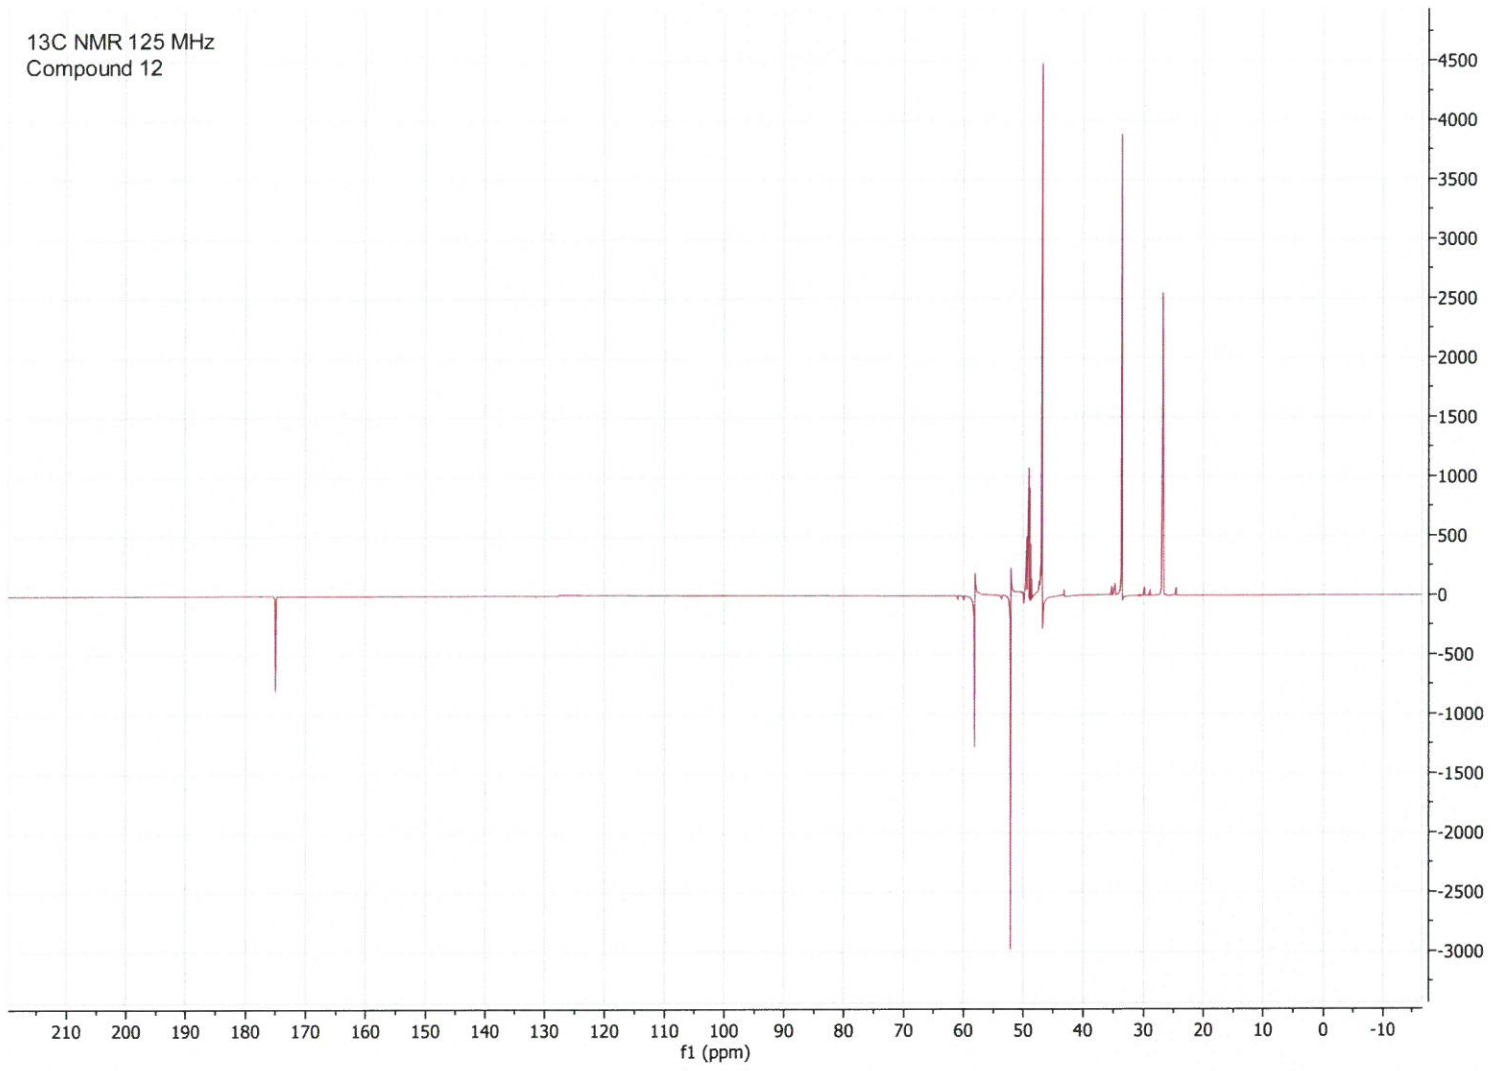



Compound 12

Window Display Report

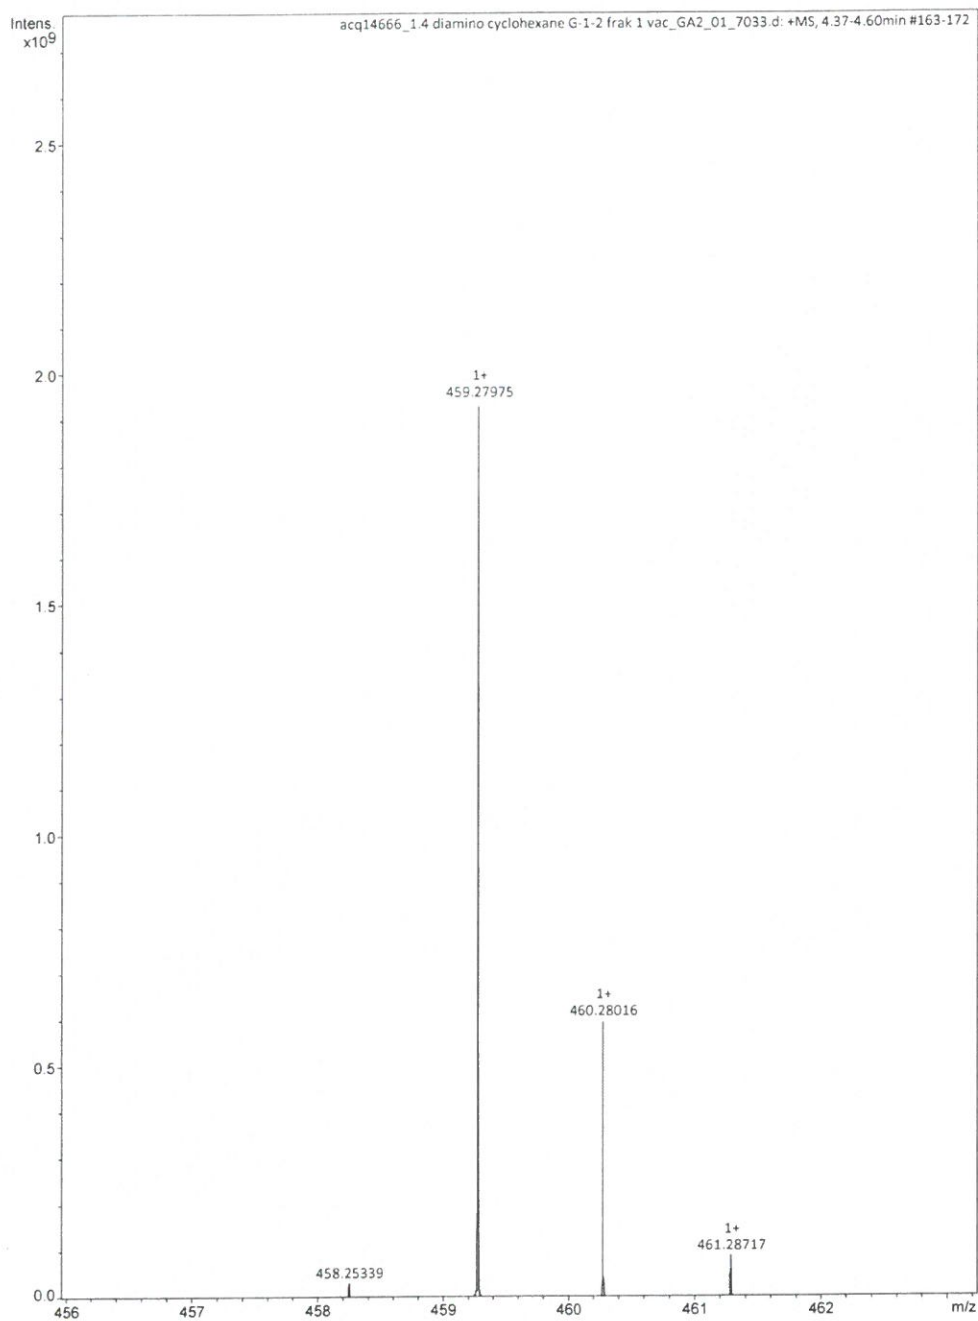

49
